# Supplementary material for: Association between changes in social capital and mental well-being among older people in China
Source: PeerJ. 2022 Aug 25;10:e13938. doi: 10.7717/peerj.13938 (PMC9420402; doi:10.7717/peerj.13938)
Supplement: Supplemental Information 2 [file peerj-10-13938-s002.xlsx]

## Sheet: Sheet1
id	time	residence	gender	age	education	marriage	y	x1	x2
110020101	1	2	2	65	2	4	1	6	10
110020101	2	2	2	67	2	4	1	10	17
110020101	3	2	2	69	2	4	0	11	17
110020101	4	2	2	71	2	4	0	10	20
110020101	5	2	2	73	2	4	0	9	21
110020101	6	2	2	75	2	4	0	9	18
110026104	1	2	2	66	2	3	0	6	17
110026104	2	2	2	68	2	3	0	8	14
110026104	3	2	2	70	2	3	0	9	15
110026104	4	2	2	72	2	3	0	11	13
110026104	5	2	2	74	2	3	0	11	17
110026104	6	2	2	76	2	3	0	10	16
110060101	1	2	1	63	2	4	1	9	16
110060101	2	2	1	65	2	4	1	8	16
110060101	3	2	1	67	2	4	1	9	17
110060101	4	2	1	69	2	4	0	11	13
110060101	5	2	1	71	2	4	1	8	14
110060101	6	2	1	73	2	4	1	8	15
110060102	1	2	2	60	2	4	1	7	6
110060102	2	2	2	62	2	4	0	11	12
110060102	3	2	2	64	2	4	0	12	19
110060102	4	2	2	66	2	4	0	12	14
110060102	5	2	2	68	2	4	0	11	13
110060102	6	2	2	70	2	4	0	9	13
110074102	1	2	2	60	2	4	1	7	6
110074102	2	2	2	62	2	4	0	10	16
110074102	3	2	2	64	2	4	0	8	16
110074102	4	2	2	66	2	4	0	8	16
110074102	5	2	2	68	2	4	0	8	17
110074102	6	2	2	70	2	3	0	6	16
110078103	1	2	2	71	1	4	1	7	12
110078103	2	2	2	73	1	4	1	9	20
110078103	3	2	2	75	1	4	0	11	15
110078103	4	2	2	78	1	4	0	11	20
110078103	5	2	2	79	1	4	0	11	19
110078103	6	2	2	81	1	4	0	9	19
110119101	1	2	2	66	3	1	0	8	17
110119101	2	2	2	68	3	1	1	8	16
110119101	3	2	2	70	3	1	0	8	19
110119101	4	2	2	72	3	1	0	6	17
110119101	5	2	2	74	3	1	0	10	22
110119101	6	2	2	76	3	1	0	8	18
110123102	1	2	2	73	3	4	1	7	9
110123102	2	2	2	75	3	4	1	10	18
110123102	3	2	2	77	3	4	1	11	22
110123102	4	2	2	79	3	4	1	10	22
110123102	5	2	2	81	3	4	1	11	24
110123102	6	2	2	83	3	4	0	10	23
120004101	1	2	1	64	2	4	1	7	10
120004101	2	2	1	66	2	4	1	9	17
120004101	3	2	1	68	2	4	1	11	14
120004101	4	2	1	70	2	4	1	10	18
120004101	5	2	1	72	2	4	1	10	19
120004101	6	2	1	74	2	4	1	6	19
120004102	1	2	2	63	2	4	1	6	10
120004102	2	2	2	65	2	4	1	8	15
120004102	3	2	2	67	2	4	1	11	17
120004102	4	2	2	69	2	4	1	10	17
120004102	5	2	2	71	2	4	1	10	19
120004102	6	2	2	73	2	4	0	9	18
120024103	1	2	1	62	1	4	1	5	11
120024103	2	2	1	64	1	4	1	11	18
120024103	3	2	1	66	1	4	1	11	17
120024103	4	2	1	68	1	4	1	10	18
120024103	5	2	1	70	1	4	1	11	18
120024103	6	2	1	72	1	4	1	11	21
120094101	1	1	1	64	2	4	1	9	21
120094101	2	1	1	66	2	4	0	11	18
120094101	3	2	1	68	2	4	1	10	19
120094101	4	2	1	70	2	4	1	10	17
120094101	5	2	1	72	2	4	1	11	20
120094101	6	2	1	74	2	4	1	10	18
130005101	1	1	1	60	2	4	0	7	11
130005101	2	1	1	62	2	4	0	11	17
130005101	3	1	1	64	2	4	0	12	20
130005101	4	1	1	66	2	4	0	10	15
130005101	5	1	1	68	2	4	0	10	15
130005101	6	1	1	70	2	4	1	12	17
130103103	1	1	2	60	1	4	1	6	12
130103103	2	1	2	62	1	4	0	9	17
130103103	3	1	2	64	1	4	1	9	17
130103103	4	1	2	66	1	4	0	9	15
130103103	5	1	2	68	1	4	1	10	18
130103103	6	1	2	70	1	4	0	10	15
130106102	1	1	2	64	1	4	1	6	10
130106102	2	1	2	66	1	4	0	9	14
130106102	3	1	2	68	1	4	0	11	19
130106102	4	1	2	70	1	4	0	9	16
130106102	5	1	2	72	1	4	1	7	18
130106102	6	1	2	74	1	4	0	5	19
130141102	1	2	1	66	3	4	1	6	11
130141102	2	2	1	68	3	4	1	11	22
130141102	3	2	1	70	3	4	1	11	19
130141102	4	2	1	72	3	4	0	11	16
130141102	5	2	1	74	3	4	0	11	19
130141102	6	2	1	76	3	4	0	11	21
130154101	1	1	2	61	1	4	1	6	10
130154101	2	1	2	63	1	3	1	9	23
130154101	3	2	2	65	1	3	1	10	20
130154101	4	2	2	67	1	3	0	10	21
130154101	5	1	2	69	1	3	1	10	23
130154101	6	1	2	71	1	3	1	5	22
130166101	1	1	1	71	1	4	0	7	16
130166101	2	1	1	73	1	4	0	10	14
130166101	3	1	1	75	1	4	0	11	13
130166101	4	1	1	77	1	4	0	11	12
130166101	5	1	1	79	1	4	0	9	9
130166101	6	1	1	81	1	4	1	10	11
130166102	1	1	2	74	1	4	0	7	22
130166102	2	1	2	76	1	4	0	9	15
130166102	3	1	2	78	1	4	0	11	18
130166102	4	1	2	80	1	4	0	9	21
130166102	5	1	2	82	1	4	0	9	24
130166102	6	1	2	84	1	4	0	9	23
130179101	1	2	2	61	2	4	0	7	12
130179101	2	2	2	63	2	4	0	10	16
130179101	3	2	2	65	2	4	0	11	19
130179101	4	2	2	67	2	4	0	10	20
130179101	5	2	2	69	2	4	0	11	20
130179101	6	2	2	71	2	4	0	10	19
130199101	1	2	2	60	3	4	0	6	11
130199101	2	2	2	62	3	4	0	7	17
130199101	3	2	2	64	3	4	0	11	18
130199101	4	2	2	66	3	4	0	10	17
130199101	5	2	2	68	3	4	0	11	19
130199101	6	2	2	70	3	4	0	8	17
130227101	1	2	2	65	1	4	1	8	23
130227101	2	2	2	67	1	3	0	10	18
130227101	3	2	2	69	1	3	1	10	24
130227101	4	2	2	71	1	3	1	11	21
130227101	5	2	2	73	1	3	0	12	19
130227101	6	2	2	75	1	3	0	11	18
130299106	1	2	2	65	2	4	0	7	15
130299106	2	2	2	67	2	4	1	10	15
130299106	3	2	2	69	2	4	1	10	13
130299106	4	2	2	71	2	4	0	12	15
130299106	5	2	2	73	2	4	1	8	16
130299106	6	2	2	75	2	4	0	5	15
130311101	1	2	2	65	1	4	1	7	8
130311101	2	2	2	67	1	4	1	8	17
130311101	3	2	2	69	1	4	0	12	19
130311101	4	2	2	71	1	4	0	11	15
130311101	5	2	2	73	1	4	1	9	20
130311101	6	2	2	75	1	4	0	8	21
130311102	1	2	1	64	1	4	1	8	18
130311102	2	2	1	66	1	4	1	8	18
130311102	3	2	1	68	1	4	1	10	17
130311102	4	2	1	70	1	4	1	9	15
130311102	5	2	1	72	1	4	1	8	21
130311102	6	2	1	74	1	4	1	7	19
130318101	1	2	2	63	1	4	0	8	16
130318101	2	2	2	65	1	4	0	9	20
130318101	3	2	2	67	1	4	1	10	19
130318101	4	2	2	69	1	4	1	11	22
130318101	5	2	2	71	1	4	1	11	17
130318101	6	2	2	73	1	4	0	12	17
130318102	1	2	1	65	2	4	0	8	17
130318102	2	2	1	67	2	4	1	9	15
130318102	3	2	1	69	2	4	1	12	20
130318102	4	2	1	71	2	4	1	11	23
130318102	5	2	1	73	2	4	1	10	15
130318102	6	2	1	75	2	4	0	12	21
130330101	1	1	1	67	1	4	1	7	12
130330101	2	1	1	69	1	4	1	10	16
130330101	3	1	1	71	1	4	1	12	18
130330101	4	1	1	73	1	4	1	10	17
130330101	5	1	1	75	1	4	1	9	18
130330101	6	1	1	77	1	4	1	11	16
130330102	1	1	2	66	1	4	1	8	15
130330102	2	1	2	68	1	4	1	10	12
130330102	3	1	2	70	1	4	1	7	16
130330102	4	1	2	72	1	4	1	10	16
130330102	5	1	2	74	1	4	1	9	18
130330102	6	1	2	76	1	4	1	11	21
130336101	1	1	1	70	2	4	1	8	16
130336101	2	1	1	72	2	4	1	12	20
130336101	3	1	1	74	2	4	0	10	19
130336101	4	1	1	76	2	4	1	9	21
130336101	5	1	1	78	2	4	1	11	20
130336101	6	1	1	80	2	4	0	11	23
130368101	1	2	1	61	2	4	1	4	11
130368101	2	2	1	63	2	4	1	8	17
130368101	3	2	1	65	2	4	1	8	20
130368101	4	2	1	67	2	4	1	7	20
130368101	5	2	1	69	2	4	1	5	21
130368101	6	2	1	71	2	4	1	6	20
130368102	1	2	2	61	1	4	1	6	13
130368102	2	2	2	63	1	4	1	11	16
130368102	3	2	2	65	1	4	1	8	17
130368102	4	2	2	67	1	4	1	10	19
130368102	5	2	2	69	1	4	1	8	21
130368102	6	2	2	71	1	4	1	8	20
130370101	1	2	1	65	2	4	1	7	17
130370101	2	2	1	67	2	4	1	7	19
130370101	3	2	1	69	2	4	1	8	17
130370101	4	2	1	71	2	4	1	10	15
130370101	5	2	1	73	2	4	1	7	20
130370101	6	2	1	75	2	4	0	7	18
130398101	1	1	1	61	1	4	1	8	20
130398101	2	1	1	63	1	4	1	9	18
130398101	3	1	1	65	1	4	1	10	15
130398101	4	1	1	67	1	4	1	10	19
130398101	5	1	1	69	1	4	0	10	20
130398101	6	1	1	71	1	4	1	6	22
130424101	1	1	2	61	1	4	0	9	16
130424101	2	1	2	63	1	4	0	10	17
130424101	3	1	2	65	1	4	0	10	17
130424101	4	1	2	67	1	4	0	10	19
130424101	5	1	2	69	1	4	0	11	20
130424101	6	1	2	71	1	4	0	6	15
130424102	1	1	1	61	1	4	1	9	19
130424102	2	1	1	63	1	4	1	10	21
130424102	3	1	1	65	1	4	1	10	17
130424102	4	1	1	67	1	4	1	10	19
130424102	5	1	1	69	1	4	1	7	19
130424102	6	1	1	71	1	4	1	6	19
130425101	1	1	1	70	2	4	0	9	16
130425101	2	1	1	72	2	4	0	8	17
130425101	3	1	1	74	2	4	1	12	19
130425101	4	1	1	76	2	4	1	11	21
130425101	5	1	1	78	2	4	0	9	22
130425101	6	1	1	80	2	4	0	8	23
130425102	1	1	2	68	1	4	0	8	17
130425102	2	1	2	70	1	4	0	9	17
130425102	3	1	2	72	1	4	0	8	18
130425102	4	1	2	74	1	4	1	11	19
130425102	5	1	2	76	1	4	0	11	21
130425102	6	1	2	78	1	4	0	5	21
130433101	1	1	1	61	1	4	1	6	13
130433101	2	1	1	63	1	4	1	10	16
130433101	3	1	1	65	1	4	1	9	16
130433101	4	1	1	67	1	4	1	6	19
130433101	5	1	1	69	1	4	1	6	20
130433101	6	1	1	71	1	4	1	8	21
130435101	1	1	1	65	1	4	1	8	22
130435101	2	1	1	67	1	4	1	9	22
130435101	3	1	1	69	1	4	1	10	20
130435101	4	1	1	71	1	4	1	9	22
130435101	5	1	1	73	1	4	1	9	21
130435101	6	1	1	75	1	4	0	9	24
130437101	1	1	1	64	2	4	0	6	5
130437101	2	1	1	66	2	4	0	9	17
130437101	3	1	1	68	2	4	0	12	19
130437101	4	1	1	70	2	4	0	9	17
130437101	5	1	1	72	2	4	0	9	18
130437101	6	1	1	74	2	4	0	11	19
130437102	1	1	2	63	1	4	0	6	11
130437102	2	1	2	65	1	4	0	10	17
130437102	3	1	2	67	1	4	0	12	17
130437102	4	1	2	69	1	4	0	9	16
130437102	5	1	2	71	1	4	0	11	19
130437102	6	1	2	73	1	4	0	11	18
130438102	1	1	1	63	2	4	1	8	16
130438102	2	1	1	65	2	4	1	8	17
130438102	3	1	1	67	2	4	1	10	17
130438102	4	1	1	69	2	4	1	8	20
130438102	5	1	1	71	2	4	1	8	19
130438102	6	1	1	73	2	4	1	8	19
130471102	1	2	2	60	2	4	0	6	11
130471102	2	2	2	62	2	4	1	8	19
130471102	3	2	2	64	2	4	1	5	21
130471102	4	2	2	66	2	4	0	5	21
130471102	5	2	2	68	2	4	1	7	22
130471102	6	2	2	70	2	4	1	9	21
130504101	1	1	2	61	1	4	0	7	10
130504101	2	1	2	63	1	4	1	6	13
130504101	3	1	2	65	1	3	0	6	11
130504101	4	1	2	67	1	3	0	11	15
130504101	5	1	2	69	1	3	0	11	15
130504101	6	1	2	71	1	3	0	8	19
130505102	1	1	2	61	1	4	1	6	9
130505102	2	1	2	63	1	4	1	8	16
130505102	3	1	2	65	1	4	0	7	18
130505102	4	1	2	67	1	4	0	12	22
130505102	5	1	2	69	1	4	0	7	20
130505102	6	1	2	71	1	4	0	9	13
130568102	1	1	1	64	2	4	1	8	19
130568102	2	1	1	66	2	4	1	10	16
130568102	3	1	1	68	2	4	1	10	17
130568102	4	1	1	70	2	4	1	12	23
130568102	5	1	1	72	2	4	1	10	21
130568102	6	1	1	74	2	4	1	12	21
130568103	1	1	2	62	1	4	0	8	19
130568103	2	1	2	64	1	4	0	9	16
130568103	3	1	2	66	1	4	1	10	15
130568103	4	1	2	68	1	4	1	8	23
130568103	5	1	2	70	1	4	1	10	20
130568103	6	1	2	72	1	4	1	9	21
130572101	1	1	1	63	1	1	1	5	14
130572101	2	1	1	65	1	1	0	7	16
130572101	3	1	1	67	1	1	0	7	18
130572101	4	1	1	69	1	1	1	4	20
130572101	5	1	1	71	1	1	0	7	18
130572101	6	1	1	73	1	1	0	5	19
130588101	1	1	1	60	2	4	1	7	13
130588101	2	1	1	62	2	4	1	9	16
130588101	3	1	1	64	2	4	0	10	15
130588101	4	1	1	66	2	4	0	7	17
130588101	5	1	1	68	2	4	1	10	22
130588101	6	1	1	70	2	4	1	10	24
130591101	1	1	1	72	1	4	1	6	10
130591101	2	1	1	74	1	4	1	9	15
130591101	3	1	1	76	1	3	1	9	19
130591101	4	1	1	78	1	3	0	9	17
130591101	5	1	1	80	1	3	1	7	19
130591101	6	1	1	82	1	3	1	11	20
130593102	1	1	2	63	1	4	1	8	20
130593102	2	1	2	65	1	3	0	6	17
130593102	3	1	2	67	1	3	0	6	12
130593102	4	1	2	69	1	3	0	9	14
130593102	5	1	2	71	1	3	0	9	19
130593102	6	1	2	73	1	3	1	9	22
130596101	1	1	1	65	1	4	0	7	13
130596101	2	1	1	67	1	4	1	10	17
130596101	3	1	1	69	1	4	1	10	18
130596101	4	1	1	71	1	4	0	10	19
130596101	5	1	1	73	1	4	0	10	17
130596101	6	1	1	75	1	4	0	11	20
130598101	1	1	1	62	1	4	0	7	5
130598101	2	1	1	64	1	4	0	9	16
130598101	3	1	1	66	1	4	0	10	14
130598101	4	1	1	68	1	4	0	9	12
130598101	5	1	1	70	1	4	0	11	12
130598101	6	1	1	72	1	4	0	9	18
130599102	1	1	2	64	1	4	0	7	7
130599102	2	1	2	66	1	4	0	9	17
130599102	3	1	2	68	1	4	0	10	17
130599102	4	1	2	70	1	4	0	7	18
130599102	5	1	2	72	1	4	0	9	16
130599102	6	1	2	74	1	4	0	12	16
130600101	1	1	1	66	2	4	1	8	13
130600101	2	1	1	68	2	4	1	8	14
130600101	3	1	1	70	2	4	1	10	14
130600101	4	1	1	72	2	4	0	11	17
130600101	5	1	1	74	2	4	0	9	15
130600101	6	1	1	76	2	4	0	8	16
130613101	1	1	1	65	1	1	0	7	18
130613101	2	1	1	67	1	1	0	7	14
130613101	3	1	1	69	1	1	0	6	20
130613101	4	1	1	71	1	1	0	8	24
130613101	5	1	1	73	1	1	0	6	24
130613101	6	1	1	75	1	1	1	7	24
130643101	1	2	1	61	1	4	0	7	7
130643101	2	2	1	63	1	4	0	9	18
130643101	3	2	1	65	1	4	1	10	22
130643101	4	2	1	67	1	4	0	9	21
130643101	5	2	1	69	1	4	0	10	20
130643101	6	2	1	71	1	4	1	10	16
130643102	1	2	2	60	1	4	0	6	10
130643102	2	2	2	62	1	4	0	10	16
130643102	3	2	2	64	1	4	0	10	19
130643102	4	2	2	66	1	4	0	10	20
130643102	5	2	2	68	1	4	0	9	18
130643102	6	2	2	70	1	4	0	9	21
130649102	1	2	2	63	2	4	1	6	10
130649102	2	2	2	65	2	4	1	10	20
130649102	3	2	2	67	2	4	1	9	16
130649102	4	2	2	69	2	4	0	10	16
130649102	5	2	2	71	2	4	1	9	19
130649102	6	2	2	73	2	4	0	11	21
130654102	1	2	2	65	1	4	1	7	11
130654102	2	2	2	67	1	4	1	12	18
130654102	3	2	2	69	1	4	1	10	18
130654102	4	2	2	71	1	4	1	10	19
130654102	5	2	2	73	1	4	1	10	21
130654102	6	2	2	75	1	4	0	10	21
130659102	1	2	2	60	1	4	1	7	13
130659102	2	2	2	62	1	4	1	10	22
130659102	3	2	2	64	1	4	1	10	20
130659102	4	2	2	66	1	3	0	10	20
130659102	5	2	2	68	1	3	1	7	24
130659102	6	2	2	70	1	3	1	6	19
130677101	1	1	2	61	1	4	1	6	17
130677101	2	1	2	63	1	4	1	11	19
130677101	3	1	2	65	1	4	1	10	19
130677101	4	1	2	67	1	4	0	11	21
130677101	5	1	2	69	1	4	1	10	18
130677101	6	1	2	71	1	4	1	11	20
130677102	1	1	1	62	1	4	1	7	7
130677102	2	1	1	64	1	4	1	11	17
130677102	3	1	1	66	1	4	0	12	21
130677102	4	1	1	68	1	4	0	12	19
130677102	5	1	1	70	1	4	1	12	18
130677102	6	1	1	72	1	4	0	12	18
130686101	1	1	1	61	1	4	0	6	10
130686101	2	1	1	63	1	4	0	9	14
130686101	3	1	1	65	1	4	1	10	19
130686101	4	1	1	67	1	4	0	8	12
130686101	5	1	1	69	1	4	0	7	14
130686101	6	1	1	71	1	4	0	8	17
130688101	1	1	1	72	1	1	0	3	7
130688101	2	1	1	74	1	1	0	7	16
130688101	3	1	1	76	1	1	0	9	19
130688101	4	1	1	78	1	1	1	6	17
130688101	5	1	1	80	1	1	0	6	15
130688101	6	1	1	82	1	1	1	5	23
130689101	1	1	1	61	1	4	1	9	20
130689101	2	1	1	63	1	4	0	8	18
130689101	3	1	1	65	1	4	1	7	18
130689101	4	1	1	67	1	4	0	9	16
130689101	5	1	1	69	1	4	0	9	18
130689101	6	1	1	71	1	4	0	10	17
130713101	1	1	2	68	1	4	1	8	18
130713101	2	1	2	70	1	4	0	8	11
130713101	3	1	2	72	1	4	1	9	17
130713101	4	1	2	74	1	4	0	6	18
130713101	5	1	2	76	1	4	1	6	15
130713101	6	1	2	78	1	4	0	4	17
130723101	1	1	1	62	2	4	1	7	7
130723101	2	1	1	64	2	4	0	9	16
130723101	3	1	1	66	2	4	1	9	16
130723101	4	1	1	68	2	4	1	12	17
130723101	5	1	1	70	2	4	1	6	19
130723101	6	1	1	72	2	4	1	11	16
130746103	1	2	2	60	2	4	1	7	10
130746103	2	2	2	62	2	4	1	10	18
130746103	3	2	2	64	2	4	1	11	22
130746103	4	2	2	66	2	4	1	10	20
130746103	5	2	2	68	2	4	1	9	19
130746103	6	2	2	70	2	4	0	8	21
130795101	1	1	1	63	1	4	1	6	9
130795101	2	1	1	65	1	4	0	9	15
130795101	3	1	1	67	1	4	1	10	18
130795101	4	1	1	69	1	4	0	10	16
130795101	5	1	1	71	1	4	0	10	20
130795101	6	1	1	73	1	4	1	7	18
130802102	1	1	2	60	1	4	0	6	12
130802102	2	1	2	62	1	4	0	8	19
130802102	3	1	2	64	1	4	0	9	14
130802102	4	1	2	66	1	3	0	9	13
130802102	5	1	2	68	1	3	0	9	20
130802102	6	1	2	70	1	4	0	9	22
130804101	1	1	2	77	1	4	0	3	12
130804101	2	1	2	79	1	4	0	8	17
130804101	3	1	2	81	1	3	0	8	14
130804101	4	1	2	83	1	3	1	9	16
130804101	5	1	2	85	1	3	1	9	23
130804101	6	1	2	87	1	3	0	9	22
130810101	1	1	1	71	1	4	1	7	16
130810101	2	1	1	73	1	4	0	9	11
130810101	3	1	1	75	1	4	0	10	13
130810101	4	1	1	77	1	4	0	10	14
130810101	5	1	1	79	1	4	0	10	10
130810101	6	1	1	81	1	4	0	9	20
130810102	1	1	2	69	1	4	0	6	8
130810102	2	1	2	71	1	4	0	9	15
130810102	3	1	2	73	1	4	0	10	14
130810102	4	1	2	75	1	4	0	10	15
130810102	5	1	2	77	1	4	0	8	17
130810102	6	1	2	79	1	4	0	8	8
130818101	1	1	2	69	1	3	0	7	16
130818101	2	1	2	71	1	3	1	6	17
130818101	3	1	2	73	1	3	0	6	21
130818101	4	1	2	75	1	3	0	9	20
130818101	5	1	2	77	1	3	0	9	23
130818101	6	1	2	79	1	3	0	9	22
130824101	1	1	1	70	2	4	0	6	13
130824101	2	1	1	72	2	4	0	7	16
130824101	3	1	1	74	2	4	1	12	19
130824101	4	1	1	76	2	4	0	6	20
130824101	5	1	1	78	2	4	0	6	18
130824101	6	1	1	80	2	4	0	10	21
130824102	1	1	2	65	1	4	0	8	17
130824102	2	1	2	67	1	4	0	7	17
130824102	3	1	2	69	1	4	0	8	19
130824102	4	1	2	71	1	4	0	7	17
130824102	5	1	2	73	1	4	0	4	19
130824102	6	1	2	75	1	4	0	9	19
130825101	1	1	1	66	2	4	1	9	16
130825101	2	1	1	68	2	4	0	8	17
130825101	3	1	1	70	2	4	1	10	22
130825101	4	1	1	72	2	4	0	10	21
130825101	5	1	1	74	2	4	0	10	23
130825101	6	1	1	76	2	4	0	10	24
130827101	1	1	2	60	1	4	0	8	18
130827101	2	1	2	62	1	4	0	8	18
130827101	3	1	2	64	1	4	0	9	15
130827101	4	1	2	66	1	4	0	8	20
130827101	5	1	2	68	1	4	0	9	20
130827101	6	1	2	70	1	4	0	9	24
130827102	1	1	1	63	1	4	1	8	20
130827102	2	1	1	65	1	4	1	9	17
130827102	3	1	1	67	1	4	1	10	16
130827102	4	1	1	69	1	4	1	8	20
130827102	5	1	1	71	1	4	1	9	19
130827102	6	1	1	73	1	4	0	10	17
130831101	1	1	1	68	1	3	0	7	10
130831101	2	1	1	70	1	3	0	8	16
130831101	3	1	1	72	1	3	1	12	20
130831101	4	1	1	74	1	3	0	10	17
130831101	5	1	1	76	1	3	0	7	17
130831101	6	1	1	78	1	3	0	10	19
130838102	1	1	2	62	1	4	1	6	6
130838102	2	1	2	64	1	4	1	9	14
130838102	3	1	2	66	1	4	0	9	21
130838102	4	1	2	68	1	4	0	10	14
130838102	5	1	2	70	1	4	1	10	16
130838102	6	1	2	72	1	4	0	10	22
130839101	1	1	1	69	2	4	1	8	24
130839101	2	1	1	71	2	4	1	9	22
130839101	3	1	1	73	2	4	0	8	24
130839101	4	1	1	75	2	4	0	10	23
130839101	5	1	1	77	2	4	0	9	24
130839101	6	1	1	79	2	4	1	11	24
130839102	1	1	2	67	1	4	0	8	21
130839102	2	1	2	69	1	4	1	8	17
130839102	3	1	2	71	1	4	1	8	24
130839102	4	1	2	73	1	4	0	9	23
130839102	5	1	2	75	1	4	0	8	24
130839102	6	1	2	77	1	4	0	9	24
130850102	1	1	2	60	1	4	0	7	13
130850102	2	1	2	62	1	4	0	10	12
130850102	3	1	2	64	1	4	0	10	19
130850102	4	1	2	66	1	4	0	12	19
130850102	5	1	2	68	1	4	0	9	19
130850102	6	1	2	70	1	4	0	9	17
130877102	1	1	1	65	1	4	0	6	8
130877102	2	1	1	67	1	4	0	9	18
130877102	3	1	1	69	1	4	0	7	17
130877102	4	1	1	71	1	4	1	10	16
130877102	5	1	1	73	1	4	1	10	22
130877102	6	1	1	75	1	4	0	9	22
130881101	1	1	2	62	1	4	1	7	13
130881101	2	1	2	64	1	4	1	9	17
130881101	3	1	2	66	1	4	0	6	15
130881101	4	1	2	68	1	3	0	11	17
130881101	5	1	2	70	1	3	0	7	20
130881101	6	1	2	72	1	3	0	5	23
130894102	1	1	1	62	2	4	1	7	8
130894102	2	1	1	64	2	4	0	9	13
130894102	3	1	1	66	2	4	0	10	15
130894102	4	1	1	68	2	4	1	8	18
130894102	5	1	1	70	2	4	0	10	17
130894102	6	1	1	72	2	4	0	9	18
130894103	1	1	2	60	1	4	1	6	8
130894103	2	1	2	62	1	4	0	9	15
130894103	3	1	2	64	1	4	0	10	17
130894103	4	1	2	66	1	4	1	10	18
130894103	5	1	2	68	1	4	0	10	19
130894103	6	1	2	70	1	4	0	8	18
130896105	1	1	2	68	1	3	0	6	10
130896105	2	1	2	70	1	3	0	8	17
130896105	3	1	2	72	1	3	0	9	17
130896105	4	1	2	74	1	3	0	6	18
130896105	5	1	2	76	1	3	0	11	16
130896105	6	1	2	78	1	3	0	8	20
130907103	1	1	2	64	1	4	1	7	14
130907103	2	1	2	66	1	4	1	9	20
130907103	3	1	2	68	1	4	1	9	21
130907103	4	1	2	70	1	4	1	11	20
130907103	5	1	2	72	1	4	0	5	23
130907103	6	2	2	74	1	4	1	9	21
130919102	1	1	2	61	1	4	0	9	17
130919102	2	1	2	63	1	4	1	8	18
130919102	3	1	2	65	1	4	1	9	20
130919102	4	1	2	67	1	4	0	10	21
130919102	5	1	2	69	1	4	0	6	22
130919102	6	1	2	71	1	4	1	10	20
130930101	1	1	1	61	1	4	1	3	14
130930101	2	1	1	63	1	3	0	9	16
130930101	3	1	1	65	1	3	0	5	21
130930101	4	1	1	67	1	3	0	4	20
130930101	5	1	1	69	1	3	0	5	17
130930101	6	1	1	71	1	3	0	5	20
140066102	1	1	1	61	1	4	0	6	8
140066102	2	1	1	63	1	4	1	10	19
140066102	3	1	1	65	1	4	0	10	17
140066102	4	1	1	67	1	4	0	9	16
140066102	5	1	1	69	1	4	0	10	21
140066102	6	1	1	71	1	4	0	10	17
140119101	1	2	1	66	1	4	1	6	14
140119101	2	2	1	68	1	4	0	9	12
140119101	3	2	1	70	1	4	1	8	16
140119101	4	2	1	72	1	4	0	9	21
140119101	5	2	1	74	1	4	0	8	20
140119101	6	2	1	76	1	3	1	11	15
140132101	1	2	1	68	1	4	0	6	14
140132101	2	2	1	70	1	4	0	9	19
140132101	3	2	1	72	1	4	1	9	20
140132101	4	2	1	74	1	4	0	9	20
140132101	5	2	1	76	1	4	0	9	19
140132101	6	2	1	78	1	4	0	9	18
140132102	1	2	2	61	1	4	0	6	13
140132102	2	2	2	63	1	4	0	9	20
140132102	3	2	2	65	1	4	0	9	20
140132102	4	2	2	67	1	4	1	9	23
140132102	5	2	2	69	1	4	0	9	17
140132102	6	2	2	71	1	4	0	9	22
140146102	1	1	1	70	1	4	1	8	13
140146102	2	1	1	72	1	4	1	7	19
140146102	3	1	1	74	1	4	0	9	19
140146102	4	2	1	77	1	3	0	9	20
140146102	5	1	1	78	1	3	0	10	21
140146102	6	1	1	80	1	3	1	7	21
140148102	1	1	1	60	2	4	0	9	14
140148102	2	1	1	62	2	4	1	9	16
140148102	3	1	1	64	2	4	1	11	15
140148102	4	1	1	66	2	4	1	7	17
140148102	5	1	1	68	2	4	1	7	17
140148102	6	1	1	70	2	4	0	6	21
140149101	1	1	1	61	1	4	1	8	12
140149101	2	1	1	63	1	4	1	10	18
140149101	3	1	1	65	1	4	1	7	16
140149101	4	1	1	67	1	3	0	10	19
140149101	5	1	1	69	1	3	0	7	16
140149101	6	1	1	71	1	3	0	10	23
140159102	1	1	1	60	2	4	1	8	13
140159102	2	1	1	62	2	4	1	11	20
140159102	3	1	1	64	2	4	1	11	15
140159102	4	1	1	66	2	4	0	12	21
140159102	5	1	1	68	2	4	1	12	19
140159102	6	1	1	70	2	4	0	11	21
140194102	1	1	2	69	1	4	1	8	9
140194102	2	1	2	71	1	4	1	10	13
140194102	3	1	2	73	1	4	1	9	17
140194102	4	1	2	75	1	4	0	9	17
140194102	5	1	2	77	1	4	0	9	15
140194102	6	1	2	79	1	3	0	9	17
140201102	1	1	1	61	1	4	0	6	9
140201102	2	1	1	63	1	4	1	9	14
140201102	3	1	1	65	1	4	0	10	18
140201102	4	1	1	67	1	4	0	9	14
140201102	5	1	1	69	1	4	0	9	20
140201102	6	1	1	71	1	4	0	10	21
140214101	1	1	2	65	2	4	0	6	10
140214101	2	1	2	67	2	4	0	9	14
140214101	3	1	2	69	2	3	1	10	14
140214101	4	1	2	71	2	3	0	11	18
140214101	5	1	2	73	2	3	0	9	9
140214101	6	1	2	75	2	3	0	11	11
140219101	1	1	1	65	2	4	0	10	14
140219101	2	1	1	67	2	4	0	10	15
140219101	3	1	1	69	2	4	0	9	16
140219101	4	1	1	71	2	4	1	10	19
140219101	5	1	1	73	2	4	1	10	21
140219101	6	1	1	75	2	4	1	11	18
140224101	1	1	2	60	1	3	0	3	6
140224101	2	1	2	62	1	3	1	7	20
140224101	3	1	2	64	1	3	0	10	18
140224101	4	1	2	66	1	3	1	7	19
140224101	5	1	2	68	1	3	0	10	17
140224101	6	1	2	70	1	3	0	6	17
140227101	1	1	2	69	1	4	0	6	8
140227101	2	1	2	71	1	4	0	10	17
140227101	3	1	2	73	1	4	1	9	21
140227101	4	1	2	75	1	4	0	8	16
140227101	5	1	2	77	1	4	0	10	15
140227101	6	1	2	79	1	3	0	10	18
140245101	1	1	2	62	1	4	0	7	6
140245101	2	1	2	64	1	4	0	7	12
140245101	3	1	2	66	1	4	0	8	13
140245101	4	1	2	68	1	4	0	7	14
140245101	5	1	2	70	1	4	0	4	11
140245101	6	1	2	72	1	4	0	9	15
140363101	1	1	2	64	1	4	1	8	10
140363101	2	1	2	66	1	4	1	12	18
140363101	3	1	2	68	1	4	1	11	20
140363101	4	1	2	70	1	4	0	9	19
140363101	5	1	2	72	1	4	0	11	18
140363101	6	1	2	74	1	4	0	11	20
140372101	1	1	1	61	2	4	1	7	10
140372101	2	1	1	63	2	4	1	9	20
140372101	3	1	1	65	2	4	1	9	18
140372101	4	1	1	67	2	4	1	8	13
140372101	5	1	1	69	2	4	1	9	19
140372101	6	1	1	71	2	4	0	8	19
140486104	1	2	2	65	2	3	1	7	8
140486104	2	2	2	67	2	3	1	10	15
140486104	3	2	2	69	2	3	1	11	15
140486104	4	2	2	71	2	3	1	10	20
140486104	5	2	2	73	2	3	1	8	21
140486104	6	2	2	75	2	3	1	10	23
140487101	1	2	2	64	2	4	1	7	21
140487101	2	2	2	66	2	4	1	10	15
140487101	3	2	2	68	2	4	0	9	18
140487101	4	2	2	70	2	4	1	10	22
140487101	5	2	2	72	2	4	1	8	21
140487101	6	2	2	74	2	4	1	10	21
140487102	1	2	1	78	2	4	1	6	18
140487102	2	2	1	80	2	4	1	10	15
140487102	3	2	1	82	2	4	1	9	16
140487102	4	2	1	84	2	4	1	10	22
140487102	5	2	1	86	2	4	1	11	20
140487102	6	2	1	78	2	4	1	11	22
140496101	1	2	1	64	2	4	1	6	11
140496101	2	2	1	66	2	4	1	10	15
140496101	3	2	1	68	2	4	0	11	16
140496101	4	2	1	70	2	4	1	8	20
140496101	5	2	1	72	2	4	1	5	20
140496101	6	2	1	74	2	4	1	8	23
140513102	1	1	1	61	2	4	1	6	11
140513102	2	1	1	63	2	4	1	10	18
140513102	3	1	1	65	2	4	1	9	15
140513102	4	1	1	68	2	4	0	11	22
140513102	5	1	1	69	2	4	1	11	16
140513102	6	1	1	71	2	4	1	11	22
140523101	1	1	2	62	1	4	0	6	9
140523101	2	1	2	64	1	4	1	11	16
140523101	3	1	2	66	1	4	0	11	17
140523101	4	1	2	68	1	4	0	11	16
140523101	5	1	2	70	1	4	0	10	19
140523101	6	1	2	72	1	4	0	12	22
140569102	1	1	2	64	1	4	0	6	8
140569102	2	1	2	66	1	3	0	9	14
140569102	3	1	2	68	1	3	0	10	20
140569102	4	1	2	70	1	3	0	10	17
140569102	5	1	2	72	1	3	0	12	20
140569102	6	1	2	74	1	3	0	11	16
140571102	1	1	2	69	1	4	1	6	8
140571102	2	1	2	71	1	4	1	12	15
140571102	3	1	2	73	1	4	1	7	20
140571102	4	1	2	75	1	3	0	6	19
140571102	5	1	2	77	1	3	0	9	20
140571102	6	1	2	79	1	3	0	11	14
140581101	1	1	2	60	1	4	1	6	9
140581101	2	1	2	62	1	4	1	9	14
140581101	3	1	2	64	1	4	0	10	16
140581101	4	1	2	66	1	4	0	9	21
140581101	5	1	2	68	1	4	0	9	17
140581101	6	1	2	70	1	4	0	12	22
140582101	1	1	1	70	1	3	1	6	9
140582101	2	1	1	72	1	3	1	7	17
140582101	3	1	1	74	1	3	1	8	16
140582101	4	1	1	76	1	3	1	7	15
140582101	5	1	1	78	1	3	1	7	13
140582101	6	1	1	80	1	3	1	4	17
140590101	1	1	1	65	1	4	0	7	8
140590101	2	1	1	67	1	4	1	12	16
140590101	3	1	1	69	1	4	1	12	15
140590101	4	1	1	71	1	4	0	12	16
140590101	5	1	1	73	1	4	0	11	20
140590101	6	1	1	75	1	4	1	9	16
140590102	1	1	2	66	1	4	0	7	9
140590102	2	1	2	68	1	4	1	8	16
140590102	3	1	2	70	1	4	1	12	15
140590102	4	1	2	72	1	4	0	8	18
140590102	5	1	2	74	1	4	0	12	20
140590102	6	1	2	76	1	4	1	12	21
140591101	1	1	1	61	1	4	0	7	8
140591101	2	1	1	63	1	4	0	9	10
140591101	3	1	1	65	1	4	1	10	14
140591101	4	1	1	67	1	4	1	9	19
140591101	5	1	1	69	1	4	0	12	19
140591101	6	1	1	71	1	4	1	12	17
140603101	1	2	1	61	1	4	0	6	11
140603101	2	2	1	63	1	4	0	6	14
140603101	3	2	1	65	1	4	1	10	16
140603101	4	2	1	67	1	4	0	8	16
140603101	5	2	1	69	1	4	0	10	19
140603101	6	2	1	71	1	4	0	8	18
140614102	1	2	2	62	1	4	1	6	13
140614102	2	2	2	64	1	4	1	8	18
140614102	3	2	2	66	1	4	1	8	16
140614102	4	2	2	68	1	4	0	11	20
140614102	5	2	2	70	1	4	0	11	19
140614102	6	2	2	72	1	4	1	9	19
140625101	1	1	1	60	1	4	0	7	5
140625101	2	1	1	62	1	4	0	9	16
140625101	3	1	1	64	1	4	0	10	13
140625101	4	1	1	66	1	4	0	9	17
140625101	5	1	1	68	1	4	0	10	21
140625101	6	1	1	70	1	4	0	10	19
140628101	1	1	1	60	2	4	1	7	11
140628101	2	1	1	62	2	4	1	10	20
140628101	3	1	1	64	2	4	1	10	17
140628101	4	1	1	66	2	4	1	10	20
140628101	5	1	1	68	2	4	1	10	19
140628101	6	1	1	70	2	4	1	7	19
140636101	1	1	1	66	1	3	1	6	15
140636101	2	1	1	68	1	3	0	6	14
140636101	3	1	1	70	1	3	1	9	15
140636101	4	1	1	72	1	3	0	6	18
140636101	5	1	1	74	1	3	0	6	21
140636101	6	1	1	76	1	3	0	6	21
140663101	1	1	1	60	1	4	0	7	7
140663101	2	1	1	62	1	4	1	10	15
140663101	3	1	1	64	1	4	0	10	21
140663101	4	1	1	67	1	4	1	9	23
140663101	5	1	1	68	1	4	0	12	24
140663101	6	1	1	70	1	4	0	12	16
140721101	1	1	1	62	1	4	0	6	10
140721101	2	1	1	64	1	4	1	10	19
140721101	3	2	1	66	1	4	1	9	17
140721101	4	2	1	68	1	4	1	12	9
140721101	5	2	1	70	1	4	1	12	19
140721101	6	2	1	72	1	4	1	8	20
140721102	1	1	2	60	1	4	0	6	8
140721102	2	1	2	62	1	4	0	11	14
140721102	3	2	2	64	1	4	0	7	17
140721102	4	2	2	66	1	4	1	11	9
140721102	5	2	2	68	1	4	0	12	15
140721102	6	2	2	70	1	4	1	10	21
140733101	1	1	1	64	2	4	1	6	10
140733101	2	1	1	66	2	4	1	9	20
140733101	3	2	1	68	2	4	1	5	22
140733101	4	2	1	70	2	4	0	9	22
140733101	5	2	1	72	2	4	0	11	19
140733101	6	2	1	74	2	4	1	11	21
140733102	1	1	2	61	1	4	0	5	16
140733102	2	1	2	63	1	4	0	11	21
140733102	3	2	2	65	1	4	1	10	20
140733102	4	2	2	67	1	4	0	11	21
140733102	5	2	2	69	1	4	0	11	24
140733102	6	2	2	71	1	4	0	11	22
140794101	1	2	1	63	2	4	1	7	5
140794101	2	2	1	65	2	4	1	10	15
140794101	3	2	1	67	2	4	1	7	18
140794101	4	2	1	69	2	4	0	10	20
140794101	5	2	1	71	2	4	1	10	20
140794101	6	2	1	73	2	4	1	7	20
210097101	1	1	1	68	2	4	0	7	8
210097101	2	1	1	70	2	4	1	9	14
210097101	3	1	1	72	2	4	1	10	16
210097101	4	1	1	74	2	4	1	6	16
210097101	5	1	1	76	2	4	1	6	18
210097101	6	1	1	78	2	4	1	12	19
210098103	1	1	1	60	2	4	0	6	9
210098103	2	1	1	62	2	4	0	9	16
210098103	3	1	1	64	2	4	0	12	19
210098103	4	1	1	66	2	4	0	10	20
210098103	5	1	1	68	2	4	0	12	23
210098103	6	1	1	70	2	4	0	8	23
210103101	1	1	1	70	1	4	0	7	11
210103101	2	1	1	72	1	4	0	9	14
210103101	3	1	1	74	1	4	0	9	12
210103101	4	1	1	76	1	3	0	11	21
210103101	5	1	1	78	1	3	0	10	18
210103101	6	1	1	80	1	3	0	12	23
210104101	1	1	1	63	1	4	1	8	10
210104101	2	1	1	65	1	4	1	9	14
210104101	3	1	1	67	1	4	0	9	12
210104101	4	1	1	69	1	4	0	6	15
210104101	5	1	1	71	1	4	0	12	20
210104101	6	1	1	73	1	4	0	12	17
210116101	1	1	1	63	1	4	0	8	16
210116101	2	1	1	65	1	4	0	9	15
210116101	3	1	1	67	1	4	1	8	17
210116101	4	1	1	69	1	4	0	10	20
210116101	5	1	1	71	1	4	0	12	19
210116101	6	1	1	73	1	4	0	12	17
210146101	1	1	1	60	2	4	1	7	8
210146101	2	1	1	62	2	4	1	9	14
210146101	3	1	1	64	2	4	1	10	16
210146101	4	2	1	66	2	4	1	12	16
210146101	5	2	1	68	2	4	0	12	21
210146101	6	2	1	70	2	4	0	12	21
210146102	1	1	2	63	1	4	0	7	9
210146102	2	1	2	65	1	4	0	12	16
210146102	3	1	2	67	1	4	1	10	20
210146102	4	2	2	69	1	4	0	9	20
210146102	5	2	2	71	1	4	0	9	19
210146102	6	2	2	73	1	4	0	12	22
210149101	1	2	1	61	2	4	1	6	9
210149101	2	2	1	63	2	4	0	12	17
210149101	3	2	1	65	2	4	1	7	11
210149101	4	1	1	67	2	4	1	7	19
210149101	5	1	1	69	2	4	1	5	19
210149101	6	1	1	71	2	4	0	11	22
210166102	1	2	1	60	2	4	1	6	11
210166102	2	2	1	62	2	4	1	8	20
210166102	3	2	1	64	2	4	1	9	18
210166102	4	1	1	66	2	4	1	6	17
210166102	5	1	1	68	2	4	1	9	22
210166102	6	1	1	70	2	4	0	9	22
210261101	1	2	1	73	2	4	0	7	5
210261101	2	2	1	75	2	4	1	10	16
210261101	3	2	1	77	2	4	0	10	15
210261101	4	2	1	79	2	4	1	8	19
210261101	5	2	1	81	2	4	0	10	16
210261101	6	2	1	83	2	4	1	9	17
210269101	1	2	2	71	1	3	1	7	14
210269101	2	2	2	73	1	3	0	9	16
210269101	3	2	2	75	1	3	1	11	23
210269101	4	2	2	77	1	3	1	11	22
210269101	5	2	2	79	1	3	1	7	22
210269101	6	2	2	81	1	3	1	11	22
210271101	1	2	1	76	2	4	1	7	10
210271101	2	2	1	78	2	4	1	9	15
210271101	3	2	1	80	2	4	0	11	17
210271101	4	2	1	82	2	3	0	11	14
210271101	5	2	1	84	2	3	0	9	18
210271101	6	2	1	86	2	3	1	11	18
210313101	1	2	2	65	2	4	1	7	13
210313101	2	2	2	67	2	4	1	10	18
210313101	3	2	2	69	2	4	1	10	20
210313101	4	2	2	71	2	4	1	11	18
210313101	5	2	2	73	2	4	1	11	20
210313101	6	2	2	75	2	4	1	8	21
210317101	1	2	1	66	4	4	1	6	12
210317101	2	2	1	68	4	4	1	7	18
210317101	3	2	1	70	4	4	1	10	18
210317101	4	2	1	72	4	4	1	10	23
210317101	5	2	1	74	4	4	1	11	21
210317101	6	2	1	76	4	4	1	10	19
210317102	1	2	2	64	4	4	1	6	9
210317102	2	2	2	66	4	4	1	10	17
210317102	3	2	2	68	4	4	1	10	17
210317102	4	2	2	70	4	4	1	11	18
210317102	5	2	2	72	4	4	1	11	19
210317102	6	2	2	74	4	4	1	11	17
210331101	1	2	2	65	2	4	1	7	13
210331101	2	2	2	67	2	4	1	10	18
210331101	3	2	2	69	2	4	1	11	18
210331101	4	2	2	71	2	4	1	10	18
210331101	5	2	2	73	2	4	1	11	21
210331101	6	2	2	75	2	4	1	10	21
210331102	1	2	1	66	3	4	1	7	11
210331102	2	2	1	68	3	4	1	10	21
210331102	3	2	1	70	3	4	1	11	19
210331102	4	2	1	72	3	4	1	10	21
210331102	5	2	1	74	3	4	0	11	24
210331102	6	2	1	76	3	4	0	10	21
210339101	1	2	2	62	2	4	1	6	12
210339101	2	2	2	64	2	4	0	7	18
210339101	3	2	2	66	2	4	1	8	21
210339101	4	2	2	68	2	4	1	9	20
210339101	5	2	2	70	2	4	1	8	20
210339101	6	2	2	72	2	4	1	4	24
210342101	1	2	2	68	2	4	1	6	8
210342101	2	2	2	70	2	4	0	10	19
210342101	3	2	2	72	2	4	1	11	14
210342101	4	2	2	74	2	4	0	10	14
210342101	5	2	2	76	2	4	0	11	20
210342101	6	2	2	78	2	4	0	8	20
210342102	1	2	1	68	1	4	1	7	11
210342102	2	2	1	70	1	4	1	10	16
210342102	3	2	1	72	1	4	1	11	20
210342102	4	2	1	74	1	4	1	10	19
210342102	5	2	1	76	1	4	1	11	17
210342102	6	2	1	78	1	4	0	10	20
210353101	1	2	1	62	1	4	0	7	11
210353101	2	2	1	64	1	4	1	10	21
210353101	3	2	1	66	1	4	1	8	16
210353101	4	2	1	68	1	4	1	11	19
210353101	5	2	1	70	1	4	1	9	18
210353101	6	2	1	72	1	4	1	11	23
210353102	1	2	2	62	2	4	1	6	12
210353102	2	2	2	64	2	4	1	10	18
210353102	3	2	2	66	2	4	1	11	19
210353102	4	2	2	68	2	4	1	10	16
210353102	5	2	2	70	2	4	1	11	19
210353102	6	2	2	72	2	4	1	11	20
210402101	1	2	1	60	2	4	1	7	8
210402101	2	2	1	62	2	4	1	10	13
210402101	3	2	1	64	2	4	1	11	19
210402101	4	2	1	66	2	4	1	8	13
210402101	5	2	1	68	2	4	0	11	15
210402101	6	2	1	70	2	4	1	11	14
210402102	1	2	2	60	2	4	1	7	12
210402102	2	2	2	62	2	4	1	10	19
210402102	3	2	2	64	2	4	1	11	21
210402102	4	2	2	66	2	4	1	11	17
210402102	5	2	2	68	2	4	1	11	23
210402102	6	2	2	70	2	4	1	11	19
210415101	1	1	1	61	1	4	0	6	14
210415101	2	1	1	63	1	4	1	12	19
210415101	3	1	1	65	1	4	1	11	22
210415101	4	1	1	68	1	4	1	8	24
210415101	5	1	1	69	1	4	1	8	20
210415101	6	1	1	71	1	4	1	7	21
210423102	1	1	1	62	2	4	1	7	11
210423102	2	1	1	64	2	4	1	11	19
210423102	3	1	1	66	2	4	1	12	19
210423102	4	1	1	68	2	4	1	12	18
210423102	5	1	1	70	2	4	1	11	22
210423102	6	1	1	72	2	4	1	11	20
210424101	1	1	1	71	1	4	0	6	8
210424101	2	1	1	73	1	4	1	12	16
210424101	3	1	1	75	1	1	0	10	17
210424101	4	1	1	77	1	4	0	10	13
210424101	5	1	1	79	1	4	0	12	14
210424101	6	1	1	81	1	4	0	10	16
210424102	1	1	2	63	1	4	0	6	9
210424102	2	1	2	65	1	4	0	9	17
210424102	3	1	2	67	1	4	0	10	23
210424102	4	1	2	69	1	4	0	10	19
210424102	5	1	2	71	1	4	0	10	21
210424102	6	1	2	73	1	4	1	7	21
210426101	1	1	1	60	1	4	0	6	11
210426101	2	1	1	62	1	4	0	10	20
210426101	3	1	1	64	1	4	0	9	20
210426101	4	1	1	66	1	4	0	10	19
210426101	5	1	1	68	1	4	0	9	19
210426101	6	1	1	70	1	4	0	9	14
210437101	1	1	1	67	2	4	1	6	9
210437101	2	1	1	69	2	4	1	9	19
210437101	3	1	1	71	2	4	1	10	16
210437101	4	1	1	73	2	4	1	10	13
210437101	5	1	1	75	2	4	0	10	16
210437101	6	1	1	77	2	4	0	9	21
210437102	1	1	2	69	2	4	1	6	11
210437102	2	1	2	71	2	4	0	7	20
210437102	3	1	2	73	2	4	1	11	18
210437102	4	1	2	75	2	4	1	10	17
210437102	5	1	2	77	2	4	0	10	21
210437102	6	1	2	79	2	4	0	9	21
210456101	1	2	2	64	1	4	0	6	10
210456101	2	2	2	66	1	4	1	11	21
210456101	3	2	2	68	1	4	1	6	18
210456101	4	2	2	70	1	4	1	8	18
210456101	5	2	2	72	1	4	0	9	20
210456101	6	2	2	74	1	4	0	10	18
210457101	1	2	2	66	1	3	1	6	12
210457101	2	2	2	68	1	3	0	7	18
210457101	3	2	2	70	1	3	1	10	19
210457101	4	2	2	72	1	3	0	10	17
210457101	5	2	2	74	1	3	0	10	19
210457101	6	2	2	76	1	3	1	11	20
210459101	1	2	2	61	1	4	0	6	7
210459101	2	2	2	63	1	4	1	9	16
210459101	3	2	2	65	1	4	1	10	17
210459101	4	2	2	67	1	4	0	10	15
210459101	5	2	2	69	1	4	1	11	14
210459101	6	2	2	71	1	4	1	10	17
210459102	1	2	1	60	1	4	0	6	5
210459102	2	2	1	62	1	4	1	12	12
210459102	3	2	1	64	1	4	0	10	14
210459102	4	2	1	66	1	4	0	10	12
210459102	5	2	1	68	1	4	1	10	11
210459102	6	2	1	70	1	4	0	5	14
210463101	1	2	2	62	2	3	1	6	10
210463101	2	2	2	64	2	3	1	9	15
210463101	3	2	2	66	2	3	1	7	19
210463101	4	2	2	68	2	3	0	7	12
210463101	5	2	2	70	2	3	1	7	21
210463101	6	2	2	72	2	3	1	7	19
210540101	1	2	2	74	1	3	0	7	9
210540101	2	2	2	76	1	3	0	11	17
210540101	3	2	2	78	1	3	1	11	17
210540101	4	2	2	80	1	3	0	11	15
210540101	5	2	2	82	1	3	0	9	19
210540101	6	2	2	84	1	3	0	11	23
210596101	1	2	2	60	1	4	1	6	7
210596101	2	2	2	62	1	4	1	8	17
210596101	3	2	2	64	1	4	0	7	18
210596101	4	2	2	66	1	4	0	10	18
210596101	5	2	2	68	1	4	0	9	14
210596101	6	2	2	70	1	4	0	7	17
210600101	1	1	1	60	2	4	1	7	13
210600101	2	1	1	62	2	4	1	12	17
210600101	3	1	1	64	2	4	1	9	19
210600101	4	1	1	66	2	4	1	12	14
210600101	5	1	1	68	2	4	0	9	18
210600101	6	1	1	70	2	4	0	12	18
210614101	1	1	1	61	1	4	1	7	9
210614101	2	1	1	63	1	4	1	9	17
210614101	3	1	1	65	1	4	1	6	15
210614101	4	1	1	67	1	4	1	10	10
210614101	5	1	1	69	1	4	1	6	19
210614101	6	1	1	71	1	4	1	11	23
210614102	1	1	2	62	1	4	1	6	12
210614102	2	1	2	64	1	4	1	8	15
210614102	3	1	2	66	1	4	1	5	18
210614102	4	1	2	68	1	4	0	10	20
210614102	5	1	2	70	1	4	1	9	20
210614102	6	1	2	72	1	4	1	5	22
210616102	1	1	2	64	1	4	0	6	11
210616102	2	1	2	66	1	3	0	11	16
210616102	3	1	2	68	1	3	0	10	17
210616102	4	1	2	70	1	3	0	9	16
210616102	5	1	2	72	1	3	0	11	19
210616102	6	1	2	74	1	3	0	10	18
210617101	1	1	2	61	1	4	1	6	11
210617101	2	1	2	63	1	4	1	9	15
210617101	3	1	2	65	1	4	1	8	19
210617101	4	1	2	67	1	4	1	9	15
210617101	5	1	2	69	1	4	0	9	17
210617101	6	1	2	71	1	4	1	7	16
210617102	1	1	1	61	1	4	1	6	9
210617102	2	1	1	63	1	4	1	8	15
210617102	3	1	1	65	1	4	1	9	17
210617102	4	1	1	67	1	4	0	8	21
210617102	5	1	1	69	1	4	0	6	23
210617102	6	1	1	71	1	4	1	11	20
210633101	1	1	2	66	2	3	0	6	9
210633101	2	1	2	68	2	3	0	9	9
210633101	3	1	2	70	2	3	1	5	15
210633101	4	1	2	72	2	3	0	8	17
210633101	5	1	2	74	2	3	1	7	19
210633101	6	1	2	76	2	3	0	6	19
210653101	1	1	1	70	2	4	1	6	11
210653101	2	1	1	72	2	4	1	10	19
210653101	3	1	1	74	2	4	1	11	17
210653101	4	1	1	76	2	4	1	10	18
210653101	5	1	1	78	2	4	0	8	22
210653101	6	1	1	80	2	4	1	9	19
210653102	1	1	2	71	1	4	1	6	12
210653102	2	1	2	73	1	4	1	9	19
210653102	3	1	2	75	1	4	1	8	17
210653102	4	1	2	77	1	4	1	11	19
210653102	5	1	2	79	1	4	1	7	23
210653102	6	1	2	81	1	4	0	11	17
210655102	1	1	2	62	1	4	0	6	10
210655102	2	1	2	64	1	4	1	10	18
210655102	3	1	2	66	1	3	1	9	16
210655102	4	1	2	68	1	3	0	9	14
210655102	5	1	2	70	1	3	0	11	23
210655102	6	1	2	72	1	3	0	6	22
210657101	1	1	1	61	1	4	1	6	8
210657101	2	1	1	63	1	4	1	9	14
210657101	3	1	1	65	1	4	1	10	18
210657101	4	1	1	67	1	4	1	9	17
210657101	5	1	1	69	1	4	1	9	17
210657101	6	1	1	71	1	4	1	12	20
210674101	1	2	1	65	2	4	1	7	11
210674101	2	2	1	67	2	4	1	8	17
210674101	3	2	1	69	2	4	1	11	21
210674101	4	2	1	71	2	4	1	10	18
210674101	5	2	1	73	2	4	1	9	16
210674101	6	2	1	75	2	4	0	11	20
210726101	1	1	2	60	1	4	1	8	15
210726101	2	1	2	62	1	4	0	7	12
210726101	3	1	2	64	1	4	1	11	15
210726101	4	1	2	66	1	4	0	7	17
210726101	5	1	2	68	1	4	0	11	19
210726101	6	1	2	70	1	4	0	8	18
210734101	1	1	2	73	1	4	1	8	14
210734101	2	1	2	75	1	4	1	8	18
210734101	3	1	2	77	1	4	0	9	19
210734101	4	1	2	79	1	4	0	7	18
210734101	5	1	2	81	1	4	0	11	20
210734101	6	1	2	83	1	3	0	7	20
210738101	1	1	1	68	2	4	1	7	7
210738101	2	1	1	70	2	4	1	9	15
210738101	3	1	1	72	2	4	1	7	17
210738101	4	1	1	74	2	4	1	5	15
210738101	5	1	1	76	2	4	1	8	19
210738101	6	1	1	78	2	4	0	9	19
210738102	1	1	2	65	1	4	1	7	7
210738102	2	1	2	67	1	4	1	9	15
210738102	3	1	2	69	1	4	1	10	17
210738102	4	1	2	71	1	4	0	10	14
210738102	5	1	2	73	1	4	0	7	18
210738102	6	1	2	75	1	4	0	8	16
210741103	1	1	2	71	1	3	1	9	15
210741103	2	1	2	73	1	3	1	7	13
210741103	3	1	2	75	1	3	1	9	15
210741103	4	1	2	77	1	3	1	9	19
210741103	5	1	2	79	1	3	1	8	20
210741103	6	1	2	81	1	3	0	6	22
210752102	1	1	2	70	1	4	0	7	15
210752102	2	1	2	72	1	4	1	9	16
210752102	3	1	2	74	1	4	1	10	19
210752102	4	1	2	76	1	4	0	9	18
210752102	5	1	2	78	1	4	1	8	24
210752102	6	1	2	80	1	4	0	7	21
210753102	1	1	1	62	1	4	1	6	11
210753102	2	1	1	64	1	4	0	8	17
210753102	3	1	1	66	1	4	0	10	15
210753102	4	1	1	68	1	4	1	8	15
210753102	5	1	1	70	1	4	0	9	18
210753102	6	1	1	72	1	4	1	7	22
210753103	1	1	2	61	1	4	0	6	8
210753103	2	1	2	63	1	4	1	8	17
210753103	3	1	2	65	1	4	0	9	15
210753103	4	1	2	67	1	4	0	7	19
210753103	5	1	2	69	1	4	0	7	16
210753103	6	1	2	71	1	4	0	7	16
210760101	1	1	1	70	2	4	1	7	8
210760101	2	1	1	72	2	4	0	9	16
210760101	3	1	1	74	2	4	1	6	14
210760101	4	1	1	76	2	4	1	6	16
210760101	5	1	1	78	2	4	0	7	16
210760101	6	1	1	80	2	4	0	9	18
210760102	1	1	2	63	1	4	1	7	13
210760102	2	1	2	65	1	4	1	7	22
210760102	3	1	2	67	1	4	1	6	20
210760102	4	1	2	69	1	4	1	6	21
210760102	5	1	2	71	1	4	1	3	19
210760102	6	1	2	73	1	4	1	5	22
210763101	1	1	1	63	1	4	1	7	8
210763101	2	1	1	65	1	4	1	8	15
210763101	3	1	1	67	1	4	1	9	14
210763101	4	1	1	69	1	4	1	9	13
210763101	5	1	1	71	1	4	1	5	18
210763101	6	1	1	73	1	4	0	11	15
210763102	1	1	2	60	1	4	1	7	7
210763102	2	1	2	62	1	4	1	8	18
210763102	3	1	2	64	1	4	1	9	16
210763102	4	1	2	66	1	4	1	9	15
210763102	5	1	2	68	1	4	1	5	20
210763102	6	1	2	70	1	4	0	11	19
210766102	1	1	2	68	1	4	0	6	9
210766102	2	1	2	70	1	4	0	11	16
210766102	3	1	2	72	1	4	0	8	15
210766102	4	1	2	74	1	4	0	10	17
210766102	5	1	2	76	1	4	0	3	16
210766102	6	1	2	78	1	4	0	10	19
210829101	1	2	1	61	1	4	0	6	10
210829101	2	2	1	63	1	4	1	8	18
210829101	3	2	1	65	1	4	1	10	20
210829101	4	2	1	67	1	4	1	12	22
210829101	5	2	1	69	1	4	0	10	21
210829101	6	2	1	71	1	4	1	10	20
210866101	1	1	1	62	2	4	1	6	12
210866101	2	1	1	64	2	4	1	9	14
210866101	3	1	1	66	2	4	1	10	15
210866101	4	1	1	68	2	4	1	7	19
210866101	5	1	1	70	2	4	1	11	16
210866101	6	1	1	72	2	4	1	7	19
210866102	1	1	2	62	1	4	1	6	13
210866102	2	1	2	64	1	4	0	9	21
210866102	3	1	2	66	1	4	0	8	19
210866102	4	1	2	68	1	4	0	12	24
210866102	5	1	2	70	1	4	1	8	22
210866102	6	1	2	72	1	4	0	12	23
210890101	1	2	1	60	3	4	1	6	14
210890101	2	2	1	62	3	4	1	10	23
210890101	3	2	1	64	3	4	1	11	21
210890101	4	2	1	66	3	4	1	7	22
210890101	5	2	1	68	3	4	1	10	22
210890101	6	2	1	70	3	4	1	6	21
210918103	1	1	2	62	1	4	1	6	12
210918103	2	1	2	64	1	4	0	8	16
210918103	3	1	2	66	1	4	1	4	20
210918103	4	1	2	68	1	4	1	3	15
210918103	5	1	2	70	1	4	1	9	18
210918103	6	1	2	72	1	4	1	9	21
210919102	1	1	1	68	1	4	1	6	10
210919102	2	1	1	70	1	4	1	8	20
210919102	3	1	1	72	1	4	0	11	21
210919102	4	1	1	74	1	4	0	11	15
210919102	5	1	1	76	1	4	0	7	19
210919102	6	1	1	78	1	4	1	11	22
210934101	1	1	1	60	2	4	1	7	13
210934101	2	1	1	62	2	4	1	7	22
210934101	3	1	1	64	2	4	1	9	18
210934101	4	1	1	66	2	4	1	6	20
210934101	5	1	1	68	2	4	1	12	17
210934101	6	1	1	70	2	4	1	7	20
210934102	1	1	2	60	1	4	1	7	12
210934102	2	1	2	62	1	4	1	7	20
210934102	3	1	2	64	1	4	0	9	21
210934102	4	1	2	66	1	4	0	9	14
210934102	5	1	2	68	1	4	1	8	18
210934102	6	1	2	70	1	4	1	12	22
210974101	1	2	1	70	1	4	1	6	13
210974101	2	2	1	72	1	4	1	10	14
210974101	3	2	1	74	1	4	1	11	17
210974101	4	2	1	76	1	4	1	11	19
210974101	5	2	1	78	1	4	1	10	19
210974101	6	2	1	80	1	4	1	11	23
210994102	1	2	2	73	1	4	0	7	9
210994102	2	2	2	75	1	4	0	9	19
210994102	3	2	2	77	1	4	0	11	19
210994102	4	2	2	79	1	4	0	10	18
210994102	5	2	2	81	1	4	0	11	19
210994102	6	2	2	83	1	4	0	7	15
210998101	1	2	2	62	2	3	1	7	11
210998101	2	2	2	64	2	3	1	6	20
210998101	3	2	2	66	2	3	1	9	19
210998101	4	2	2	68	2	3	1	7	21
210998101	5	2	2	70	2	3	1	10	16
210998101	6	2	2	72	2	3	0	6	20
211041101	1	1	1	73	1	3	1	7	7
211041101	2	1	1	75	1	3	0	10	16
211041101	3	1	1	77	1	3	0	9	18
211041101	4	1	1	79	1	3	0	11	16
211041101	5	1	1	81	1	3	0	8	14
211041101	6	1	1	83	1	3	1	5	17
211062101	1	1	2	66	1	4	0	6	0
211062101	2	1	2	68	1	4	0	10	16
211062101	3	1	2	70	1	4	0	10	14
211062101	4	1	2	72	1	4	0	9	23
211062101	5	1	2	74	1	4	0	6	20
211062101	6	1	2	76	1	4	0	8	16
211063101	1	1	1	64	2	4	1	6	9
211063101	2	1	1	66	2	4	0	10	14
211063101	3	1	1	68	2	4	0	12	18
211063101	4	1	1	70	2	4	0	10	21
211063101	5	1	1	72	2	4	0	11	18
211063101	6	1	1	74	2	4	1	10	21
211063102	1	1	2	64	3	4	1	6	9
211063102	2	1	2	66	3	4	1	10	19
211063102	3	1	2	68	3	4	0	12	16
211063102	4	1	2	70	3	4	0	10	20
211063102	5	1	2	72	3	4	0	10	17
211063102	6	1	2	74	3	4	0	12	20
211068101	1	1	2	64	1	4	1	6	8
211068101	2	1	2	66	1	4	1	10	15
211068101	3	1	2	68	1	4	1	7	14
211068101	4	1	2	70	1	4	1	10	19
211068101	5	1	2	72	1	4	0	10	22
211068101	6	1	2	74	1	4	1	9	22
211070101	1	1	2	64	1	4	0	7	16
211070101	2	1	2	66	1	4	0	10	14
211070101	3	1	2	68	1	4	0	9	17
211070101	4	1	2	70	1	4	0	7	15
211070101	5	1	2	72	1	4	0	8	21
211070101	6	1	2	74	1	4	0	9	21
211071102	1	1	2	68	1	4	1	6	10
211071102	2	1	2	70	1	4	0	7	16
211071102	3	1	2	72	1	4	1	8	19
211071102	4	1	2	74	1	4	0	10	20
211071102	5	1	2	76	1	4	0	9	21
211071102	6	1	2	78	1	4	0	8	17
211078102	1	1	2	64	1	4	0	6	14
211078102	2	1	2	66	1	4	1	7	19
211078102	3	1	2	68	1	4	1	9	18
211078102	4	1	2	70	1	4	1	9	18
211078102	5	1	2	72	1	4	1	11	18
211078102	6	1	2	74	1	4	0	10	22
211083102	1	2	2	74	1	4	1	5	10
211083102	2	2	2	76	1	3	1	10	20
211083102	3	2	2	78	1	3	1	7	19
211083102	4	2	2	80	1	3	1	11	20
211083102	5	2	2	82	1	3	1	6	22
211083102	6	2	2	84	1	3	0	6	21
211106101	1	2	2	70	1	4	1	7	11
211106101	2	2	2	72	1	4	1	9	17
211106101	3	2	2	74	1	4	1	6	21
211106101	4	2	2	76	1	4	1	10	20
211106101	5	2	2	78	1	4	0	11	21
211106101	6	2	2	80	1	4	1	10	22
211244102	1	2	1	69	2	4	1	6	11
211244102	2	2	1	71	2	4	0	9	17
211244102	3	2	1	73	2	3	1	8	16
211244102	4	2	1	75	2	3	0	7	16
211244102	5	2	1	77	2	3	1	11	18
211244102	6	2	1	79	2	4	0	10	17
211281103	1	2	2	61	2	4	0	6	7
211281103	2	2	2	63	2	4	1	10	14
211281103	3	2	2	65	2	4	0	12	20
211281103	4	2	2	67	2	4	1	11	19
211281103	5	2	2	69	2	4	1	11	19
211281103	6	2	2	71	2	4	1	9	19
211312101	1	2	1	65	2	4	1	6	12
211312101	2	2	1	67	2	4	1	10	19
211312101	3	2	1	69	2	4	1	11	19
211312101	4	2	1	71	2	4	1	11	19
211312101	5	2	1	73	2	4	1	11	21
211312101	6	2	1	75	2	4	1	7	19
211315101	1	2	1	67	2	4	1	4	8
211315101	2	2	1	69	2	4	1	11	21
211315101	3	2	1	71	2	1	0	11	20
211315101	4	2	1	73	2	4	0	10	19
211315101	5	2	1	75	2	4	0	11	19
211315101	6	2	1	77	2	4	0	11	18
211316101	1	2	1	69	2	4	1	7	10
211316101	2	2	1	71	2	4	1	11	20
211316101	3	2	1	73	2	4	1	11	19
211316101	4	2	1	75	2	4	1	11	17
211316101	5	2	1	77	2	4	1	11	21
211316101	6	2	1	79	2	4	1	11	20
211317101	1	2	1	74	4	4	1	4	11
211317101	2	2	1	76	4	4	1	11	17
211317101	3	2	1	78	4	4	1	11	17
211317101	4	2	1	80	4	4	1	9	20
211317101	5	2	1	82	4	4	1	11	16
211317101	6	2	1	84	4	4	1	8	17
211324101	1	2	2	63	2	4	1	7	12
211324101	2	2	2	65	2	4	0	10	19
211324101	3	2	2	67	2	4	1	11	20
211324101	4	2	2	69	2	4	0	10	19
211324101	5	2	2	71	2	4	1	10	21
211324101	6	2	2	73	2	4	1	8	20
211358102	1	2	2	66	1	4	1	6	12
211358102	2	2	2	68	1	4	1	7	16
211358102	3	2	2	70	1	4	0	5	17
211358102	4	2	2	72	1	4	0	9	17
211358102	5	2	2	74	1	4	1	8	18
211358102	6	2	2	76	1	4	0	11	22
211359101	1	2	1	64	3	4	1	6	11
211359101	2	2	1	66	3	4	1	10	21
211359101	3	2	1	68	3	4	1	11	21
211359101	4	2	1	70	3	4	1	11	22
211359101	5	2	1	72	3	4	1	11	22
211359101	6	2	1	74	3	4	1	10	21
211359102	1	2	2	66	2	4	1	6	10
211359102	2	2	2	68	2	4	1	11	18
211359102	3	2	2	70	2	4	1	11	21
211359102	4	2	2	72	2	4	1	10	22
211359102	5	2	2	74	2	4	1	8	21
211359102	6	2	2	76	2	4	1	7	22
211374101	1	1	2	61	1	4	1	8	24
211374101	2	1	2	63	1	4	0	10	14
211374101	3	1	2	65	1	4	0	10	22
211374101	4	1	2	67	1	4	0	9	13
211374101	5	1	2	69	1	4	0	9	22
211374101	6	1	2	71	1	4	1	10	18
211375101	1	1	1	67	2	4	1	7	10
211375101	2	1	1	69	2	4	0	10	16
211375101	3	1	1	71	2	4	0	10	20
211375101	4	1	1	73	2	4	1	8	18
211375101	5	1	1	75	2	4	1	10	16
211375101	6	1	1	77	2	4	0	9	15
211384102	1	1	1	61	1	4	0	7	10
211384102	2	1	1	63	1	4	0	9	15
211384102	3	1	1	65	1	4	0	10	15
211384102	4	1	1	67	1	4	1	9	17
211384102	5	1	1	69	1	4	1	11	13
211384102	6	1	1	71	1	4	1	12	22
211409102	1	1	1	70	2	4	0	6	13
211409102	2	1	1	72	2	4	1	9	17
211409102	3	1	1	74	2	4	1	9	20
211409102	4	1	1	76	2	4	0	9	15
211409102	5	1	1	78	2	4	0	10	11
211409102	6	1	1	80	2	4	0	7	17
211417102	1	1	1	63	1	4	0	9	19
211417102	2	1	1	65	1	4	1	10	20
211417102	3	1	1	67	1	4	1	9	23
211417102	4	1	1	69	1	4	0	10	20
211417102	5	1	1	71	1	4	1	12	18
211417102	6	1	1	73	1	4	0	10	22
211424103	1	1	1	64	1	4	0	6	10
211424103	2	1	1	66	1	4	0	9	18
211424103	3	1	1	68	1	4	0	8	18
211424103	4	1	1	70	1	4	0	9	17
211424103	5	1	1	72	1	4	0	9	17
211424103	6	1	1	74	1	4	1	10	19
211424104	1	1	2	60	1	4	1	6	9
211424104	2	1	2	62	1	4	1	10	12
211424104	3	1	2	64	1	4	1	6	17
211424104	4	1	2	66	1	4	1	9	21
211424104	5	1	2	68	1	4	1	9	21
211424104	6	1	2	70	1	4	1	7	22
211438102	1	1	2	60	1	4	0	6	11
211438102	2	1	2	62	1	4	1	8	13
211438102	3	1	2	64	1	4	0	8	20
211438102	4	1	2	66	1	4	0	11	21
211438102	5	1	2	68	1	4	0	11	20
211438102	6	1	2	70	1	4	0	9	21
211467101	1	1	1	61	1	4	1	7	6
211467101	2	1	1	63	1	4	1	8	16
211467101	3	1	1	65	1	4	1	10	10
211467101	4	1	1	67	1	4	0	10	15
211467101	5	1	1	69	1	4	0	9	19
211467101	6	1	1	71	1	4	0	10	23
211496102	1	1	1	60	1	4	1	10	17
211496102	2	1	1	62	1	4	0	10	23
211496102	3	1	1	64	1	4	1	8	21
211496102	4	1	1	66	1	4	1	10	21
211496102	5	1	1	68	1	4	0	10	20
211496102	6	1	1	70	1	4	0	8	18
211496105	1	1	2	60	1	4	0	6	11
211496105	2	1	2	62	1	4	1	8	19
211496105	3	1	2	64	1	4	0	7	22
211496105	4	1	2	66	1	4	0	10	16
211496105	5	1	2	68	1	4	0	10	15
211496105	6	1	2	70	1	4	1	8	23
211499105	1	1	2	71	1	3	0	8	15
211499105	2	1	2	73	1	3	0	8	12
211499105	3	1	2	75	1	3	0	9	21
211499105	4	1	2	77	1	3	0	7	20
211499105	5	1	2	79	1	3	0	9	24
211499105	6	1	2	81	1	3	0	8	20
211513102	1	2	2	69	1	4	0	6	2
211513102	2	2	2	71	1	4	0	7	14
211513102	3	2	2	73	1	4	0	10	13
211513102	4	1	2	75	1	4	0	7	11
211513102	5	2	2	77	1	4	0	11	15
211513102	6	2	2	79	1	4	0	8	17
211524102	1	2	2	65	1	4	0	6	6
211524102	2	2	2	67	1	4	0	11	12
211524102	3	2	2	69	1	4	0	7	15
211524102	4	2	2	71	1	4	0	10	12
211524102	5	2	2	73	1	4	0	10	14
211524102	6	2	2	75	1	4	0	11	13
211533101	1	2	2	62	1	4	1	6	11
211533101	2	2	2	64	1	4	0	8	15
211533101	3	2	2	66	1	4	0	9	14
211533101	4	1	2	68	1	4	0	11	13
211533101	5	2	2	70	1	4	0	8	16
211533101	6	2	2	72	1	4	0	8	20
211533102	1	2	1	63	1	4	1	7	11
211533102	2	2	1	65	1	4	1	8	21
211533102	3	2	1	67	1	4	1	11	21
211533102	4	1	1	69	1	4	1	8	18
211533102	5	2	1	71	1	4	1	12	20
211533102	6	2	1	73	1	4	1	7	17
211582101	1	2	2	65	2	4	1	6	14
211582101	2	2	2	67	2	4	1	10	18
211582101	3	2	2	69	2	4	1	8	21
211582101	4	2	2	71	2	4	1	10	22
211582101	5	2	2	73	2	4	1	8	21
211582101	6	2	2	75	2	4	1	10	22
211601104	1	2	1	60	2	4	1	6	11
211601104	2	2	1	62	2	4	1	10	20
211601104	3	2	1	64	2	4	1	10	17
211601104	4	2	1	66	2	4	1	9	17
211601104	5	2	1	68	2	4	1	8	11
211601104	6	1	1	70	2	4	0	12	18
211603101	1	2	1	61	3	4	0	6	9
211603101	2	2	1	63	3	4	1	10	20
211603101	3	2	1	65	3	4	1	11	21
211603101	4	2	1	67	3	4	1	11	20
211603101	5	2	1	69	3	4	1	11	21
211603101	6	2	1	71	3	4	1	11	20
211616101	1	2	1	63	3	4	0	7	9
211616101	2	2	1	65	3	4	0	10	15
211616101	3	2	1	67	3	4	1	11	16
211616101	4	2	1	69	3	4	0	10	16
211616101	5	2	1	71	3	4	0	10	17
211616101	6	2	1	73	3	4	0	11	16
211616102	1	2	2	60	2	4	0	7	7
211616102	2	2	2	62	2	4	0	10	15
211616102	3	2	2	64	2	4	1	11	17
211616102	4	2	2	66	2	4	0	10	17
211616102	5	2	2	68	2	4	0	9	17
211616102	6	2	2	70	2	4	0	11	17
211651101	1	2	2	63	2	4	0	7	8
211651101	2	2	2	65	2	4	1	10	20
211651101	3	2	2	67	2	4	1	11	19
211651101	4	2	2	69	2	4	0	7	19
211651101	5	2	2	71	2	4	1	8	18
211651101	6	2	2	73	2	4	1	11	19
211651102	1	2	1	65	2	4	1	7	10
211651102	2	2	1	67	2	4	1	10	16
211651102	3	2	1	69	2	4	1	11	17
211651102	4	2	1	71	2	4	1	8	20
211651102	5	2	1	73	2	4	0	8	19
211651102	6	2	1	75	2	4	1	8	20
211652101	1	2	1	61	2	4	1	7	12
211652101	2	2	1	63	2	4	1	9	22
211652101	3	2	1	65	2	4	1	11	18
211652101	4	2	1	67	2	4	1	8	22
211652101	5	2	1	69	2	4	1	11	18
211652101	6	2	1	71	2	4	1	7	20
211652102	1	2	2	61	1	4	1	7	13
211652102	2	2	2	63	1	4	0	11	20
211652102	3	2	2	65	1	4	1	11	20
211652102	4	2	2	67	1	4	1	10	21
211652102	5	2	2	69	1	4	1	11	20
211652102	6	2	2	71	1	4	0	11	19
211654103	1	2	1	63	2	4	1	7	10
211654103	2	2	1	65	2	4	0	9	22
211654103	3	2	1	67	2	4	1	11	16
211654103	4	2	1	69	2	4	1	11	14
211654103	5	2	1	71	2	4	1	10	16
211654103	6	2	1	73	2	4	0	11	16
211672101	1	2	2	68	3	4	1	6	9
211672101	2	2	2	70	3	4	1	10	16
211672101	3	2	2	72	3	4	1	11	19
211672101	4	2	2	74	3	4	0	11	17
211672101	5	2	2	76	3	4	1	11	16
211672101	6	2	2	78	3	4	0	10	19
211672102	1	2	1	71	4	4	1	8	19
211672102	2	2	1	73	4	4	1	8	20
211672102	3	2	1	75	4	4	1	9	21
211672102	4	2	1	77	4	4	1	9	19
211672102	5	2	1	79	4	4	1	11	22
211672102	6	2	1	81	4	4	1	6	24
211673101	1	2	1	73	4	4	1	9	17
211673101	2	2	1	75	4	4	1	10	16
211673101	3	2	1	77	4	4	1	11	15
211673101	4	2	1	79	4	4	1	11	18
211673101	5	2	1	81	4	4	1	11	16
211673101	6	2	1	83	4	4	1	11	20
211673102	1	2	2	69	2	4	0	7	12
211673102	2	2	2	71	2	4	1	10	18
211673102	3	2	2	73	2	4	0	10	14
211673102	4	2	2	75	2	4	0	11	17
211673102	5	2	2	77	2	4	0	11	16
211673102	6	2	2	79	2	4	1	11	17
211677101	1	2	1	72	2	3	1	6	9
211677101	2	2	1	74	2	3	1	9	13
211677101	3	2	1	76	2	3	1	10	19
211677101	4	2	1	78	2	3	1	11	17
211677101	5	2	1	80	2	3	0	11	17
211677101	6	2	1	82	2	3	0	11	20
211697101	1	2	2	70	1	4	0	6	13
211697101	2	2	2	72	1	4	1	10	18
211697101	3	2	2	74	1	4	0	10	19
211697101	4	2	2	76	1	4	0	11	19
211697101	5	2	2	78	1	4	1	11	18
211697101	6	2	2	80	1	4	0	9	21
211697102	1	2	1	72	1	4	1	7	13
211697102	2	2	1	74	1	4	1	10	20
211697102	3	2	1	76	1	4	0	11	20
211697102	4	2	1	78	1	4	0	11	18
211697102	5	2	1	80	1	4	0	11	19
211697102	6	2	1	82	1	4	0	9	18
211705101	1	2	1	64	2	4	1	7	9
211705101	2	2	1	66	2	4	1	9	13
211705101	3	2	1	68	2	4	1	11	12
211705101	4	2	1	70	2	4	1	11	16
211705101	5	2	1	72	2	4	1	10	11
211705101	6	2	1	74	2	4	0	10	16
211705102	1	2	2	64	1	4	1	7	11
211705102	2	2	2	66	1	4	0	9	21
211705102	3	2	2	68	1	4	0	10	20
211705102	4	2	2	70	1	4	0	10	20
211705102	5	2	2	72	1	4	1	11	22
211705102	6	2	2	74	1	4	1	11	21
211714102	1	2	2	67	1	4	1	6	8
211714102	2	2	2	69	1	4	1	8	17
211714102	3	2	2	71	1	4	0	9	16
211714102	4	2	2	73	1	4	1	8	14
211714102	5	2	2	75	1	4	0	9	19
211714102	6	2	2	77	1	4	0	6	21
211719101	1	2	2	61	2	4	0	7	10
211719101	2	2	2	63	2	4	1	6	18
211719101	3	2	2	65	2	4	0	11	17
211719101	4	2	2	67	2	4	0	11	16
211719101	5	2	2	69	2	4	0	11	21
211719101	6	2	2	71	2	4	0	9	19
211765101	1	2	1	66	1	4	0	9	12
211765101	2	2	1	68	1	4	0	10	12
211765101	3	2	1	70	1	4	1	12	19
211765101	4	2	1	72	1	4	0	9	21
211765101	5	2	1	74	1	4	1	9	20
211765101	6	2	1	76	1	4	1	8	22
211773103	1	2	2	63	1	3	1	6	12
211773103	2	2	2	65	1	3	0	9	12
211773103	3	2	2	67	1	3	0	8	18
211773103	4	2	2	69	1	3	1	6	17
211773103	5	2	2	71	1	3	0	8	15
211773103	6	2	2	73	1	3	1	8	20
211780102	1	2	2	68	1	4	0	6	9
211780102	2	2	2	70	1	4	1	9	15
211780102	3	2	2	72	1	4	1	8	21
211780102	4	2	2	74	1	4	1	9	16
211780102	5	2	2	76	1	4	0	8	17
211780102	6	2	2	78	1	4	0	9	20
211784102	1	2	2	66	2	4	0	6	10
211784102	2	2	2	68	2	4	0	11	18
211784102	3	2	2	70	2	4	1	8	12
211784102	4	2	2	72	2	4	0	11	18
211784102	5	2	2	74	2	4	1	7	16
211784102	6	2	2	76	2	4	0	10	18
211837102	1	2	1	61	2	4	1	6	3
211837102	2	2	1	63	2	4	1	10	14
211837102	3	2	1	65	2	4	1	11	18
211837102	4	2	1	67	2	4	1	11	13
211837102	5	2	1	69	2	4	1	11	17
211837102	6	2	1	71	2	4	1	10	13
211837103	1	2	2	60	2	4	1	6	8
211837103	2	2	2	62	2	4	0	10	15
211837103	3	2	2	64	2	4	1	11	19
211837103	4	2	2	66	2	4	1	11	16
211837103	5	2	2	68	2	4	0	11	18
211837103	6	2	2	70	2	4	1	11	18
211850101	1	2	2	63	2	4	1	6	10
211850101	2	2	2	65	2	4	0	10	14
211850101	3	2	2	67	2	4	0	11	17
211850101	4	2	2	69	2	4	1	11	14
211850101	5	2	2	71	2	4	0	11	11
211850101	6	2	2	73	2	4	0	10	17
211884101	1	2	2	64	2	3	1	7	7
211884101	2	2	2	66	2	3	1	10	16
211884101	3	2	2	68	2	3	1	11	13
211884101	4	2	2	71	2	3	1	10	15
211884101	5	2	2	72	2	3	0	11	18
211884101	6	2	2	74	2	3	0	11	22
211885101	1	1	1	61	2	4	0	9	16
211885101	2	1	1	63	2	4	0	8	16
211885101	3	1	1	65	2	4	0	10	12
211885101	4	1	1	67	2	4	0	10	17
211885101	5	1	1	69	2	4	1	11	16
211885101	6	1	1	71	2	4	0	9	19
211923101	1	1	1	64	1	4	1	6	13
211923101	2	1	1	66	1	4	1	12	19
211923101	3	1	1	68	1	4	1	9	16
211923101	4	1	1	70	1	4	0	6	15
211923101	5	1	1	72	1	4	0	9	21
211923101	6	1	1	74	1	4	0	5	21
211929101	1	1	1	64	1	4	0	7	6
211929101	2	1	1	66	1	4	1	9	11
211929101	3	1	1	68	1	4	1	12	17
211929101	4	1	1	70	1	4	1	10	19
211929101	5	1	1	72	1	4	1	10	17
211929101	6	1	1	74	1	4	0	7	15
220060101	1	2	1	61	1	4	1	9	18
220060101	2	2	1	63	1	4	1	9	17
220060101	3	2	1	65	1	4	1	11	19
220060101	4	2	1	67	1	4	1	12	19
220060101	5	1	1	69	1	4	1	9	17
220060101	6	1	1	71	1	4	1	10	18
220060102	1	2	2	60	1	4	1	7	17
220060102	2	2	2	62	1	4	1	8	14
220060102	3	2	2	64	1	4	0	9	18
220060102	4	2	2	66	1	4	0	11	22
220060102	5	1	2	68	1	4	0	9	16
220060102	6	1	2	70	1	4	0	9	21
220081101	1	2	1	60	1	4	1	8	12
220081101	2	2	1	62	1	4	1	6	17
220081101	3	2	1	64	1	4	1	11	21
220081101	4	2	1	66	1	4	0	9	15
220081101	5	1	1	68	1	4	0	6	22
220081101	6	1	1	70	1	4	0	6	16
220091104	1	1	1	62	2	4	1	6	10
220091104	2	1	1	64	2	4	1	9	18
220091104	3	1	1	66	2	4	1	9	19
220091104	4	1	1	68	2	4	1	10	20
220091104	5	2	1	70	2	4	1	6	21
220091104	6	2	1	72	2	4	0	11	19
220137101	1	2	2	63	2	4	0	7	5
220137101	2	2	2	65	2	4	0	9	13
220137101	3	2	2	67	2	4	0	10	11
220137101	4	2	2	69	2	4	0	10	20
220137101	5	2	2	71	2	4	0	10	12
220137101	6	2	2	73	2	4	0	8	17
220165102	1	1	2	66	1	4	0	6	9
220165102	2	1	2	68	1	4	1	9	22
220165102	3	1	2	70	1	4	0	11	18
220165102	4	1	2	72	1	4	0	10	19
220165102	5	1	2	74	1	4	0	9	21
220165102	6	2	2	76	1	4	1	9	15
220186102	1	2	1	67	2	4	1	6	8
220186102	2	2	1	69	2	4	1	10	17
220186102	3	2	1	71	2	4	1	11	17
220186102	4	2	1	73	2	4	1	10	20
220186102	5	2	1	75	2	4	1	8	20
220186102	6	2	1	77	2	4	0	8	20
220186103	1	2	2	63	1	4	1	6	12
220186103	2	2	2	65	1	4	0	10	20
220186103	3	2	2	67	1	4	1	10	21
220186103	4	2	2	69	1	4	0	10	22
220186103	5	2	2	71	1	4	0	10	21
220186103	6	2	2	73	1	4	1	9	23
220257101	1	2	1	70	2	4	1	8	16
220257101	2	2	1	72	2	4	1	8	17
220257101	3	2	1	74	2	4	0	9	18
220257101	4	2	1	76	2	4	1	8	20
220257101	5	2	1	78	2	4	1	7	21
220257101	6	2	1	80	2	4	1	9	22
220287102	1	1	1	60	2	4	1	6	11
220287102	2	1	1	62	2	4	1	8	18
220287102	3	1	1	64	2	4	1	11	19
220287102	4	1	1	66	2	4	0	7	20
220287102	5	1	1	68	2	4	0	10	19
220287102	6	1	1	70	2	4	0	7	20
220290101	1	1	1	60	1	4	1	6	10
220290101	2	1	1	62	1	4	0	8	13
220290101	3	1	1	64	1	4	1	11	17
220290101	4	1	1	66	1	4	1	8	20
220290101	5	1	1	68	1	4	0	10	18
220290101	6	1	1	70	1	4	1	10	19
220323101	1	2	2	61	2	4	1	7	8
220323101	2	2	2	63	2	4	1	10	18
220323101	3	1	2	65	2	4	1	10	19
220323101	4	2	2	67	2	4	1	10	18
220323101	5	2	2	69	2	4	1	11	19
220323101	6	2	2	71	2	4	1	10	19
220328101	1	2	1	65	1	4	1	6	10
220328101	2	2	1	67	1	3	0	7	19
220328101	3	2	1	69	1	3	1	9	22
220328101	4	2	1	71	1	4	1	9	19
220328101	5	2	1	73	1	4	0	9	20
220328101	6	2	1	75	1	4	1	11	15
220330101	1	2	1	64	2	4	1	6	10
220330101	2	2	1	66	2	4	1	4	21
220330101	3	2	1	68	2	4	1	8	15
220330101	4	2	1	70	2	4	1	10	19
220330101	5	2	1	72	2	4	1	7	17
220330101	6	2	1	74	2	4	1	9	18
220330102	1	2	2	62	1	4	1	8	20
220330102	2	2	2	64	1	4	0	11	21
220330102	3	2	2	66	1	4	0	7	17
220330102	4	2	2	68	1	4	0	10	12
220330102	5	2	2	70	1	4	0	11	18
220330102	6	2	2	72	1	4	0	8	22
220352104	1	2	2	69	1	3	0	6	8
220352104	2	2	2	71	1	3	0	11	14
220352104	3	2	2	73	1	3	0	10	18
220352104	4	2	2	75	1	3	0	9	18
220352104	5	2	2	77	1	3	1	10	18
220352104	6	2	2	79	1	3	0	8	16
230034101	1	1	2	60	1	4	1	6	8
230034101	2	1	2	62	1	4	1	8	20
230034101	3	1	2	64	1	4	1	10	20
230034101	4	1	2	66	1	4	1	9	23
230034101	5	1	2	68	1	4	0	9	21
230034101	6	1	2	70	1	4	1	12	22
230071101	1	2	1	60	1	4	0	7	13
230071101	2	2	1	62	1	4	0	10	16
230071101	3	2	1	64	1	4	0	12	19
230071101	4	2	1	66	1	4	0	9	20
230071101	5	2	1	68	1	4	1	10	16
230071101	6	2	1	70	1	4	1	9	17
230081101	1	2	2	61	1	4	0	6	13
230081101	2	2	2	63	1	4	0	9	19
230081101	3	2	2	65	1	4	0	10	22
230081101	4	2	2	67	1	4	0	9	20
230081101	5	2	2	69	1	4	0	10	23
230081101	6	2	2	71	1	4	0	10	21
230088101	1	2	2	73	1	3	0	6	4
230088101	2	2	2	75	1	3	0	9	13
230088101	3	2	2	77	1	3	0	10	20
230088101	4	2	2	79	1	3	0	9	15
230088101	5	2	2	81	1	3	0	6	16
230088101	6	1	2	83	1	3	0	5	20
230155101	1	2	2	68	1	4	0	6	9
230155101	2	2	2	70	1	4	0	7	12
230155101	3	2	2	72	1	4	0	11	19
230155101	4	2	2	74	1	4	0	10	20
230155101	5	2	2	76	1	4	1	11	16
230155101	6	2	2	78	1	3	0	10	21
230167101	1	1	1	61	2	4	0	7	10
230167101	2	1	1	63	2	4	1	11	19
230167101	3	1	1	65	2	4	1	9	19
230167101	4	1	1	67	2	4	0	10	17
230167101	5	1	1	69	2	4	1	9	21
230167101	6	1	1	71	2	4	0	7	24
230191101	1	1	2	66	1	4	0	6	6
230191101	2	1	2	68	1	4	1	11	19
230191101	3	1	2	70	1	4	0	10	18
230191101	4	1	2	72	1	4	1	10	17
230191101	5	1	2	74	1	4	1	9	21
230191101	6	2	2	76	1	4	1	8	22
230191102	1	1	1	64	2	4	1	7	12
230191102	2	1	1	66	2	4	1	9	18
230191102	3	1	1	68	2	4	1	10	16
230191102	4	1	1	70	2	4	1	10	17
230191102	5	1	1	72	2	4	1	10	22
230191102	6	2	1	74	2	4	1	10	20
230283101	1	2	2	60	1	4	0	6	12
230283101	2	2	2	62	1	4	1	11	16
230283101	3	2	2	64	1	4	1	11	14
230283101	4	2	2	67	1	4	0	10	16
230283101	5	2	2	68	1	4	1	11	19
230283101	6	2	2	70	1	4	0	11	16
230329101	1	2	2	65	1	4	1	7	11
230329101	2	2	2	67	1	4	1	10	20
230329101	3	2	2	69	1	4	1	11	21
230329101	4	2	2	71	1	4	0	9	24
230329101	5	2	2	73	1	4	1	8	22
230329101	6	2	2	75	1	4	0	11	24
230355102	1	2	2	61	2	4	1	9	22
230355102	2	2	2	63	2	4	1	7	21
230355102	3	2	2	65	2	4	1	11	20
230355102	4	2	2	67	2	4	1	11	21
230355102	5	2	2	69	2	4	1	11	18
230355102	6	2	2	71	2	4	1	11	24
230375103	1	2	2	66	1	4	1	6	8
230375103	2	2	2	68	1	4	0	10	17
230375103	3	2	2	70	1	4	1	11	20
230375103	4	2	2	72	1	4	0	11	19
230375103	5	2	2	74	1	4	0	11	21
230375103	6	2	2	76	1	4	1	10	17
230454101	1	2	1	61	2	3	1	4	13
230454101	2	2	1	63	2	4	1	10	19
230454101	3	2	1	65	2	4	1	10	18
230454101	4	2	1	67	2	4	1	10	16
230454101	5	2	1	69	2	4	1	10	16
230454101	6	2	1	71	2	4	1	7	18
230509103	1	1	2	67	1	4	0	6	10
230509103	2	1	2	69	1	4	1	9	13
230509103	3	1	2	71	1	4	0	10	17
230509103	4	1	2	73	1	4	0	11	13
230509103	5	1	2	75	1	4	0	9	17
230509103	6	1	2	77	1	4	0	10	22
230511101	1	1	1	61	1	4	1	7	9
230511101	2	1	1	63	1	4	0	8	12
230511101	3	1	1	65	1	4	0	9	13
230511101	4	1	1	67	1	4	1	9	12
230511101	5	1	1	69	1	4	1	8	18
230511101	6	1	1	71	1	4	0	9	11
230520102	1	1	2	62	1	4	0	6	14
230520102	2	1	2	64	1	4	1	10	21
230520102	3	1	2	66	1	4	0	11	15
230520102	4	1	2	68	1	4	0	11	20
230520102	5	1	2	70	1	4	1	10	19
230520102	6	1	2	72	1	4	0	10	21
230530101	1	1	1	64	1	4	0	7	9
230530101	2	1	1	66	1	4	1	10	14
230530101	3	1	1	68	1	4	1	11	19
230530101	4	1	1	70	1	4	0	10	16
230530101	5	1	1	72	1	4	1	10	20
230530101	6	2	1	74	1	4	1	8	18
230537102	1	1	1	60	2	4	0	6	9
230537102	2	1	1	62	2	4	1	10	18
230537102	3	1	1	64	2	4	1	11	12
230537102	4	1	1	66	2	4	0	8	10
230537102	5	1	1	68	2	4	0	11	7
230537102	6	1	1	70	2	4	0	9	15
230537103	1	1	2	65	1	4	0	6	13
230537103	2	1	2	67	1	4	0	10	18
230537103	3	1	2	69	1	4	0	11	18
230537103	4	1	2	71	1	4	0	8	13
230537103	5	1	2	73	1	4	0	8	18
230537103	6	1	2	75	1	4	0	8	20
230542101	1	1	2	67	1	4	0	6	11
230542101	2	1	2	69	1	4	1	11	21
230542101	3	1	2	71	1	4	1	11	18
230542101	4	1	2	73	1	4	0	11	19
230542101	5	1	2	75	1	4	1	9	17
230542101	6	1	2	77	1	3	1	10	19
230544101	1	1	1	61	2	4	0	7	12
230544101	2	1	1	63	2	4	1	10	18
230544101	3	1	1	65	2	4	0	11	15
230544101	4	1	1	67	2	4	1	10	22
230544101	5	1	1	69	2	4	1	9	17
230544101	6	1	1	71	2	4	0	11	21
230549103	1	1	2	60	1	4	1	6	9
230549103	2	1	2	62	1	4	1	9	16
230549103	3	1	2	64	1	4	0	8	14
230549103	4	1	2	66	1	4	0	9	15
230549103	5	1	2	68	1	4	0	9	13
230549103	6	1	2	70	1	4	0	11	12
230565101	1	1	1	68	2	4	1	8	18
230565101	2	1	1	70	2	4	1	9	15
230565101	3	1	1	72	2	4	1	9	21
230565101	4	1	1	74	2	4	1	9	15
230565101	5	1	1	76	2	4	0	11	18
230565101	6	1	1	78	2	4	0	8	20
230565105	1	1	2	64	1	4	1	6	11
230565105	2	1	2	66	1	4	1	9	16
230565105	3	1	2	68	1	4	0	8	15
230565105	4	1	2	70	1	4	0	11	16
230565105	5	1	2	72	1	4	0	11	19
230565105	6	1	2	74	1	4	0	9	19
230568101	1	1	1	61	1	4	1	6	11
230568101	2	1	1	63	1	4	0	8	15
230568101	3	1	1	65	1	4	1	11	21
230568101	4	1	1	67	1	4	1	10	18
230568101	5	2	1	69	1	4	0	10	12
230568101	6	2	1	71	1	4	1	10	17
230585102	1	2	1	64	2	4	1	6	10
230585102	2	2	1	66	2	4	1	10	15
230585102	3	2	1	68	2	4	1	11	16
230585102	4	2	1	70	2	4	1	9	17
230585102	5	2	1	72	2	4	1	11	20
230585102	6	2	1	74	2	4	1	8	20
310052101	1	2	1	61	2	4	1	6	10
310052101	2	2	1	63	2	4	1	9	15
310052101	3	2	1	65	2	4	1	11	16
310052101	4	2	1	67	2	4	1	11	16
310052101	5	2	1	69	2	4	1	6	14
310052101	6	2	1	71	2	4	1	6	16
310087101	1	2	2	64	2	3	1	6	15
310087101	2	2	2	66	2	3	1	6	16
310087101	3	2	2	68	2	3	1	8	17
310087101	4	2	2	70	2	3	0	6	15
310087101	5	2	2	72	2	3	1	6	20
310087101	6	2	2	74	2	3	0	6	17
310119101	1	2	2	78	1	3	0	2	20
310119101	2	2	2	80	1	3	0	11	11
310119101	3	2	2	82	1	3	1	11	22
310119101	4	2	2	84	1	3	0	7	16
310119101	5	2	2	86	1	3	0	10	24
310119101	6	2	2	88	1	3	0	5	22
310182102	1	2	2	65	2	4	1	9	16
310182102	2	2	2	67	2	4	1	7	19
310182102	3	2	2	69	2	4	1	9	18
310182102	4	2	2	71	2	4	1	9	19
310182102	5	2	2	73	2	4	1	9	18
310182102	6	2	2	75	2	4	1	11	20
310211101	1	2	2	67	3	3	1	5	18
310211101	2	2	2	69	3	3	1	9	21
310211101	3	2	2	71	3	3	1	11	14
310211101	4	2	2	73	3	3	0	8	22
310211101	5	2	2	75	3	3	0	8	17
310211101	6	2	2	77	3	3	0	8	21
310273101	1	2	1	62	2	4	1	9	18
310273101	2	2	1	64	2	4	1	11	20
310273101	3	2	1	66	2	4	1	7	18
310273101	4	2	1	68	2	4	1	9	21
310273101	5	2	1	70	2	4	1	9	17
310273101	6	2	1	72	2	4	1	9	19
310273102	1	2	2	60	1	4	1	9	21
310273102	2	2	2	62	1	4	1	8	13
310273102	3	2	2	64	1	4	1	9	16
310273102	4	2	2	66	1	4	0	9	20
310273102	5	2	2	68	1	4	1	9	19
310273102	6	2	2	70	1	4	1	9	18
310309101	1	2	1	68	2	4	1	6	10
310309101	2	2	1	70	2	4	1	8	20
310309101	3	2	1	72	2	4	1	9	20
310309101	4	2	1	74	2	4	1	7	18
310309101	5	2	1	76	2	4	1	9	21
310309101	6	2	1	78	2	4	1	11	17
310309102	1	2	2	66	1	4	0	6	10
310309102	2	2	2	68	1	4	1	8	18
310309102	3	2	2	70	1	4	1	9	17
310309102	4	2	2	72	1	4	1	11	19
310309102	5	2	2	74	1	4	1	9	20
310309102	6	2	2	76	1	4	1	8	19
310391102	1	2	2	65	2	4	0	6	13
310391102	2	2	2	67	2	4	1	7	12
310391102	3	2	2	69	2	4	1	11	9
310391102	4	2	2	71	2	4	0	9	7
310391102	5	2	2	73	2	4	0	6	6
310391102	6	2	2	75	2	4	1	6	14
310417101	1	2	2	66	3	4	1	7	13
310417101	2	2	2	68	3	4	1	7	17
310417101	3	2	2	70	3	4	1	9	20
310417101	4	2	2	72	3	4	0	8	16
310417101	5	2	2	74	3	4	1	9	21
310417101	6	2	2	76	3	4	1	11	18
310417102	1	2	1	74	2	4	1	7	14
310417102	2	2	1	76	2	4	0	9	13
310417102	3	2	1	78	2	4	1	11	19
310417102	4	2	1	80	2	4	1	7	22
310417102	5	2	1	82	2	4	0	6	18
310417102	6	2	1	84	2	4	0	11	21
310457101	1	2	1	65	2	4	1	6	9
310457101	2	2	1	67	2	4	1	9	15
310457101	3	2	1	69	2	4	1	8	17
310457101	4	2	1	71	2	4	1	10	17
310457101	5	2	1	73	2	4	1	10	18
310457101	6	2	1	75	2	4	1	9	18
310457102	1	2	2	65	2	4	1	8	19
310457102	2	2	2	67	2	4	1	7	17
310457102	3	2	2	69	2	4	0	8	16
310457102	4	2	2	71	2	4	1	10	19
310457102	5	2	2	73	2	4	1	8	20
310457102	6	2	2	75	2	4	0	9	17
310480101	1	2	1	64	4	3	1	3	9
[truncated: 4,331 more rows]
