# Supplementary material for: Association between changes in social capital and mental well-being among older people in China
Source: PeerJ. 2022 Aug 25;10:e13938. doi: 10.7717/peerj.13938 (PMC9420402; doi:10.7717/peerj.13938)
Supplement: Supplemental Information 3 [file peerj-10-13938-s003.xlsx]

## Sheet: Sheet1
Variables	code
Time
2010	1
2012	2
2014	3
2016	4
2018	5
2020	6
Residence
rural	1
urban	2
Gender
male	1
female	2
Education
elementary school and below	1
junior high school	2
senior high school	3
undergraduate or higher	4
Marriage
not married	1
divorced	2
widowed	3
married	4
y
poor mental well-being	1
good mental well-being	0
x1	structual social capital
x2	cognitive social capital
