# Supplementary material for: Association between changes in social capital and mental well-being among older people in China
Source: PeerJ. 2022 Aug 25;10:e13938. doi: 10.7717/peerj.13938 (PMC9420402; doi:10.7717/peerj.13938)
Supplement: Supplemental Information 4 [file peerj-10-13938-s004.xlsx]

## Sheet: mental well-being
pid	var1	var2	var3	var4	var5	var6
110020101	0	0	0	0	0	0
110020101	0	0	0	0	0	0
110020101	0	0	0	0	2	2
110020101	3	0	0	0	3	0
110020101	1	1	0	0	2	0
110020101	1	1	0	0	2	0
110026104	1	1	0	1	0	0
110026104	2	0	1	2	2	1
110026104	3	0	0	1	0	1
110026104	1	0	1	1	1	1
110026104	1	1	2	3	1	1
110026104	1	0	2	1	0	0
110060101	0	0	0	0	0	0
110060101	0	0	0	0	0	0
110060101	1	1	0	0	0	0
110060101	2	1	0	2	1	0
110060101	1	0	0	0	0	0
110060101	1	0	0	0	0	0
110060102	1	0	0	0	0	0
110060102	2	2	1	1	2	0
110060102	0	3	0	0	0	0
110060102	2	2	1	1	0	0
110060102	2	0	1	2	2	1
110060102	1	0	1	1	1	0
110074102	0	0	0	0	0	0
110074102	1	1	2	1	2	2
110074102	0	0	0	2	2	0
110074102	2	0	1	1	2	0
110074102	0	0	1	1	2	0
110074102	1	0	3	1	3	0
110078103	0	0	0	0	0	0
110078103	0	0	1	0	0	0
110078103	0	3	0	0	0	0
110078103	0	1	0	1	1	0
110078103	0	2	0	0	1	0
110078103	1	3	0	0	1	0
110119101	0	2	1	0	1	0
110119101	0	0	1	0	0	0
110119101	3	3	3	2	3	1
110119101	3	3	3	3	2	0
110119101	2	3	3	1	2	0
110119101	1	3	1	0	1	0
110123102	0	0	0	0	0	0
110123102	0	0	1	0	1	0
110123102	1	0	0	0	0	0
110123102	0	1	0	1	0	0
110123102	0	0	0	0	0	0
110123102	1	2	0	0	1	0
120004101	0	0	0	0	0	0
120004101	0	0	0	0	0	0
120004101	0	0	0	0	0	0
120004101	0	0	0	0	0	0
120004101	0	0	0	0	0	0
120004101	0	0	0	0	0	0
120004102	0	0	0	0	0	0
120004102	0	0	1	0	0	0
120004102	0	0	0	0	1	0
120004102	0	1	0	0	0	0
120004102	0	2	0	0	0	0
120004102	0	3	0	0	0	0
120024103	0	0	0	0	0	0
120024103	0	0	1	0	0	0
120024103	0	0	0	0	0	0
120024103	0	0	1	1	0	0
120024103	1	0	0	0	0	0
120024103	1	1	0	0	0	0
120094101	0	0	0	0	0	0
120094101	1	1	0	0	1	0
120094101	0	1	0	0	0	0
120094101	0	0	0	1	0	0
120094101	1	0	0	0	1	0
120094101	1	0	0	0	1	0
130005101	1	1	1	0	2	0
130005101	0	1	1	0	1	0
130005101	2	1	0	0	1	0
130005101	1	2	0	1	1	0
130005101	1	3	0	0	1	0
130005101	0	0	1	0	1	0
130103103	0	0	0	0	0	0
130103103	3	1	3	2	1	0
130103103	0	0	0	0	0	0
130103103	1	1	1	1	0	0
130103103	0	1	0	0	0	0
130103103	1	2	0	1	1	0
130106102	0	0	0	0	0	0
130106102	0	3	0	1	0	1
130106102	2	2	2	0	3	0
130106102	0	1	1	0	1	0
130106102	0	1	0	0	1	0
130106102	0	2	0	1	1	0
130141102	0	0	0	0	0	0
130141102	0	0	1	0	1	0
130141102	0	1	1	0	0	0
130141102	0	1	0	1	1	0
130141102	0	2	0	0	1	0
130141102	0	3	0	0	0	0
130154101	0	0	0	0	0	0
130154101	0	0	1	1	0	0
130154101	0	0	0	0	0	0
130154101	0	1	0	1	1	0
130154101	1	0	0	0	0	0
130154101	1	0	0	0	0	0
130166101	2	3	2	3	1	3
130166101	1	0	0	2	0	2
130166101	2	0	0	2	2	2
130166101	3	2	1	1	2	0
130166101	0	1	1	3	3	3
130166101	0	0	0	0	0	0
130166102	0	0	0	1	2	1
130166102	0	1	1	1	1	0
130166102	1	1	0	0	1	1
130166102	0	1	1	1	1	0
130166102	1	1	3	1	3	1
130166102	3	0	1	1	0	0
130179101	1	1	1	1	1	1
130179101	1	1	1	0	1	0
130179101	2	2	1	1	1	1
130179101	2	2	1	3	2	0
130179101	3	2	0	1	2	0
130179101	1	2	0	0	1	0
130199101	1	1	1	1	1	1
130199101	1	1	1	1	0	0
130199101	2	1	1	2	2	1
130199101	2	1	0	2	1	0
130199101	1	2	0	0	0	0
130199101	0	3	0	1	0	1
130227101	0	0	0	0	0	0
130227101	0	0	1	1	1	0
130227101	0	0	0	0	0	0
130227101	1	1	0	0	0	0
130227101	1	1	0	0	1	0
130227101	1	2	1	0	2	0
130299106	1	1	1	0	0	0
130299106	0	0	0	0	0	0
130299106	0	0	0	0	0	2
130299106	1	1	0	0	2	0
130299106	0	0	0	0	0	0
130299106	1	2	2	2	1	1
130311101	0	0	0	0	0	0
130311101	0	0	1	0	1	0
130311101	1	0	1	0	1	0
130311101	1	0	1	1	2	0
130311101	0	0	0	0	0	0
130311101	1	0	0	0	2	0
130311102	0	0	0	0	0	0
130311102	0	0	0	0	0	0
130311102	0	0	0	0	0	0
130311102	1	0	0	0	0	0
130311102	0	0	0	0	0	0
130311102	0	0	0	0	0	0
130318101	1	1	1	0	0	0
130318101	0	0	2	1	1	0
130318101	0	0	0	0	0	0
130318101	0	0	0	1	0	0
130318101	0	0	0	0	0	0
130318101	0	3	2	1	0	3
130318102	1	1	1	0	0	0
130318102	0	0	1	0	0	0
130318102	0	0	0	0	0	0
130318102	0	0	0	0	0	0
130318102	1	0	0	0	1	0
130318102	1	0	1	0	1	0
130330101	0	0	0	0	0	0
130330101	0	0	0	0	0	0
130330101	0	0	2	0	0	0
130330101	1	0	0	0	0	0
130330101	0	1	0	0	0	0
130330101	0	0	0	0	1	0
130330102	1	1	0	0	0	0
130330102	0	0	1	0	1	0
130330102	0	0	0	0	1	0
130330102	1	0	0	0	0	0
130330102	0	0	0	1	1	0
130330102	0	0	0	0	0	0
130336101	0	0	0	0	0	0
130336101	0	0	0	1	0	0
130336101	0	1	0	1	0	1
130336101	1	0	0	1	0	0
130336101	0	0	0	0	0	0
130336101	1	1	0	0	1	0
130368101	0	0	0	0	0	0
130368101	0	0	0	0	0	0
130368101	0	0	0	0	0	0
130368101	0	0	0	0	0	0
130368101	0	0	0	0	0	0
130368101	0	0	0	0	0	0
130368102	0	0	0	0	0	0
130368102	0	0	0	0	0	0
130368102	0	0	0	0	0	0
130368102	0	0	0	0	0	0
130368102	1	0	0	0	0	0
130368102	0	0	0	0	0	0
130370101	0	0	0	0	0	0
130370101	0	0	0	0	0	0
130370101	0	0	0	0	0	0
130370101	0	0	0	1	0	0
130370101	0	0	0	0	0	0
130370101	1	0	0	0	2	0
130398101	0	0	0	0	0	0
130398101	0	0	0	0	0	0
130398101	0	0	0	0	0	0
130398101	0	0	0	0	0	0
130398101	0	2	0	0	3	0
130398101	0	0	0	0	0	0
130424101	2	1	1	1	2	1
130424101	1	1	1	0	1	0
130424101	0	2	3	0	1	0
130424101	0	3	0	0	0	0
130424101	1	2	1	1	1	0
130424101	1	2	1	1	1	0
130424102	1	0	0	0	0	0
130424102	0	0	0	0	2	0
130424102	0	0	0	0	1	0
130424102	0	0	0	0	0	0
130424102	0	0	0	0	0	0
130424102	1	0	0	0	0	0
130425101	2	0	2	2	2	2
130425101	1	0	2	1	1	0
130425101	0	0	0	0	0	0
130425101	0	0	0	0	0	0
130425101	1	2	0	0	0	0
130425101	1	1	0	0	1	1
130425102	1	0	2	1	3	0
130425102	1	0	0	1	3	0
130425102	0	1	2	0	2	0
130425102	0	0	0	0	0	0
130425102	0	2	0	1	1	0
130425102	1	0	1	1	1	1
130433101	1	0	0	0	0	0
130433101	0	0	0	0	0	0
130433101	0	0	0	0	0	0
130433101	0	0	0	0	0	0
130433101	0	0	0	0	0	0
130433101	0	0	0	0	0	0
130435101	0	0	0	0	0	1
130435101	0	0	1	0	1	0
130435101	0	0	0	0	0	0
130435101	0	1	0	0	1	0
130435101	0	1	0	0	0	0
130435101	1	1	1	1	2	0
130437101	2	1	1	2	2	2
130437101	0	0	2	0	3	0
130437101	1	1	0	0	1	1
130437101	1	1	0	1	1	0
130437101	1	1	0	1	1	0
130437101	1	2	1	1	2	0
130437102	1	1	1	2	2	1
130437102	1	0	1	0	1	0
130437102	0	0	1	1	2	1
130437102	0	1	1	1	1	0
130437102	1	0	2	1	1	0
130437102	2	2	1	1	2	0
130438102	0	0	0	0	0	0
130438102	0	0	0	0	0	0
130438102	0	0	0	0	0	0
130438102	0	0	0	0	1	0
130438102	0	0	0	0	0	0
130438102	1	1	0	0	0	0
130471102	1	1	1	0	0	0
130471102	0	0	0	0	0	0
130471102	0	0	0	0	0	0
130471102	1	2	2	1	0	0
130471102	0	1	0	0	0	0
130471102	1	0	0	1	0	0
130504101	2	2	2	2	2	2
130504101	0	0	0	0	0	1
130504101	3	3	2	0	3	3
130504101	1	1	1	1	2	2
130504101	2	2	2	1	2	1
130504101	1	1	2	1	1	1
130505102	0	0	0	0	1	1
130505102	0	0	0	0	0	0
130505102	1	1	1	1	1	1
130505102	1	2	1	1	1	0
130505102	1	1	0	1	2	0
130505102	1	2	1	1	3	0
130568102	0	0	0	0	0	0
130568102	0	0	0	0	0	0
130568102	0	0	0	0	0	0
130568102	1	0	0	0	0	0
130568102	0	0	0	0	0	0
130568102	0	0	0	0	0	0
130568103	1	1	1	0	0	0
130568103	0	1	1	0	1	0
130568103	0	1	1	0	0	0
130568103	1	0	0	0	0	0
130568103	0	0	0	0	0	0
130568103	0	1	0	0	0	0
130572101	1	1	0	0	0	0
130572101	2	0	1	0	1	1
130572101	1	1	1	0	2	1
130572101	0	0	0	0	0	0
130572101	0	2	0	0	2	0
130572101	0	2	0	0	2	0
130588101	0	0	0	0	0	0
130588101	0	0	0	0	0	0
130588101	1	2	0	0	0	0
130588101	3	1	0	1	0	0
130588101	0	0	0	0	0	0
130588101	0	0	0	0	0	0
130591101	0	0	0	0	0	0
130591101	0	0	0	1	0	0
130591101	0	0	0	0	0	0
130591101	2	0	0	1	1	0
130591101	0	1	1	0	0	0
130591101	0	0	0	0	0	0
130593102	1	0	0	0	1	0
130593102	1	1	2	1	2	0
130593102	1	1	1	1	2	1
130593102	2	0	0	1	2	0
130593102	1	1	0	1	2	0
130593102	0	0	1	0	0	0
130596101	1	1	1	0	1	0
130596101	0	0	1	0	1	0
130596101	1	0	0	0	1	0
130596101	1	1	0	0	1	0
130596101	1	1	1	0	1	0
130596101	2	3	0	0	3	0
130598101	2	0	0	2	2	0
130598101	0	0	1	1	1	0
130598101	1	1	0	0	0	1
130598101	3	0	0	0	0	0
130598101	1	0	1	1	1	1
130598101	2	0	0	1	3	1
130599102	1	1	2	1	1	1
130599102	1	1	1	0	1	1
130599102	1	1	1	1	1	1
130599102	1	0	1	0	0	1
130599102	1	1	1	1	1	1
130599102	2	2	1	2	2	0
130600101	0	0	0	0	0	0
130600101	0	0	1	0	1	0
130600101	0	0	0	0	0	0
130600101	2	2	1	1	0	0
130600101	1	1	0	0	1	0
130600101	0	3	0	0	0	0
130613101	1	2	1	0	1	0
130613101	0	0	3	0	3	0
130613101	2	1	1	0	2	0
130613101	2	3	1	1	3	0
130613101	1	3	0	1	0	0
130613101	0	2	0	0	0	0
130643101	1	1	1	1	1	1
130643101	1	1	0	1	1	1
130643101	0	1	1	0	0	0
130643101	2	1	1	1	1	1
130643101	1	1	1	1	1	1
130643101	0	0	0	0	0	0
130643102	1	1	1	1	1	1
130643102	1	1	1	1	1	1
130643102	1	1	1	0	1	0
130643102	2	2	1	1	1	1
130643102	1	1	1	1	1	0
130643102	1	1	1	1	1	0
130649102	0	0	1	0	0	0
130649102	0	0	0	0	0	0
130649102	0	0	0	0	0	0
130649102	2	1	1	1	1	1
130649102	0	0	0	0	0	0
130649102	1	1	1	1	1	0
130654102	0	0	0	0	0	0
130654102	0	0	0	0	0	0
130654102	1	0	0	0	0	0
130654102	1	0	0	0	0	0
130654102	0	0	0	0	0	0
130654102	1	0	0	2	2	0
130659102	0	0	0	0	0	0
130659102	0	0	0	0	0	0
130659102	0	0	0	0	0	0
130659102	2	1	0	1	0	0
130659102	0	0	0	0	0	0
130659102	0	0	0	0	0	0
130677101	0	0	0	0	0	0
130677101	0	0	1	0	0	0
130677101	1	0	0	0	0	0
130677101	3	0	0	0	0	0
130677101	0	0	0	0	0	0
130677101	0	1	0	0	0	0
130677102	0	0	0	0	0	0
130677102	1	0	1	0	0	0
130677102	1	0	0	0	2	0
130677102	2	0	0	1	2	0
130677102	1	0	0	0	1	0
130677102	1	1	1	1	1	0
130686101	2	3	2	2	1	2
130686101	0	1	2	1	0	2
130686101	1	0	0	0	0	0
130686101	0	0	2	3	2	3
130686101	1	0	1	1	1	0
130686101	3	0	2	1	1	2
130688101	0	0	0	2	1	1
130688101	2	2	0	3	3	3
130688101	2	1	2	0	2	0
130688101	0	0	0	0	0	0
130688101	1	2	1	1	1	2
130688101	0	0	0	0	0	0
130689101	0	0	0	0	0	0
130689101	2	2	2	2	2	2
130689101	1	0	0	0	0	0
130689101	2	2	0	1	1	0
130689101	1	2	1	1	1	0
130689101	1	1	0	0	1	0
130713101	0	0	0	0	0	0
130713101	1	0	2	0	3	0
130713101	0	0	0	0	0	0
130713101	0	3	0	0	0	0
130713101	1	1	0	0	0	0
130713101	3	2	2	0	3	0
130723101	0	0	0	0	0	0
130723101	0	0	3	0	0	0
130723101	0	0	0	0	0	0
130723101	1	0	0	0	0	0
130723101	0	0	0	0	0	0
130723101	1	0	0	0	0	0
130746103	0	1	0	0	0	0
130746103	0	0	1	0	1	0
130746103	1	0	1	0	0	0
130746103	0	0	0	0	0	0
130746103	1	0	0	1	0	0
130746103	2	1	0	1	0	0
130795101	0	0	0	0	0	0
130795101	0	1	2	2	2	0
130795101	2	0	0	0	0	0
130795101	2	0	0	1	1	0
130795101	1	1	1	0	1	0
130795101	0	0	2	0	0	0
130802102	2	1	3	2	2	3
130802102	0	0	1	2	2	0
130802102	1	3	1	2	2	1
130802102	3	0	3	2	2	2
130802102	2	0	2	3	2	3
130802102	2	0	0	0	2	0
130804101	1	1	1	0	1	1
130804101	2	2	2	3	2	3
130804101	2	0	0	0	0	2
130804101	1	0	0	0	0	0
130804101	0	0	0	0	0	0
130804101	2	0	2	2	2	2
130810101	0	0	0	0	0	0
130810101	0	0	0	3	0	0
130810101	2	2	1	1	1	1
130810101	1	3	2	1	2	3
130810101	1	1	1	1	1	1
130810101	0	2	2	2	2	0
130810102	2	2	2	2	2	2
130810102	3	2	2	2	1	2
130810102	2	2	2	2	2	2
130810102	0	3	3	3	3	3
130810102	3	3	3	2	3	3
130810102	1	2	0	0	2	0
130818101	2	2	2	0	0	0
130818101	0	0	0	0	0	0
130818101	2	2	1	0	0	0
130818101	2	1	0	0	0	3
130818101	0	0	0	2	0	2
130818101	2	2	2	2	2	2
130824101	2	0	2	0	0	0
130824101	0	0	3	3	3	0
130824101	1	0	0	0	0	0
130824101	2	3	1	1	3	1
130824101	3	2	0	0	3	3
130824101	3	3	3	3	3	3
130824102	1	3	0	0	0	0
130824102	1	1	1	1	3	2
130824102	2	2	2	2	2	2
130824102	1	3	1	1	3	1
130824102	1	3	0	0	3	0
130824102	3	2	2	1	3	2
130825101	0	0	0	0	1	0
130825101	1	0	3	0	1	0
130825101	1	0	0	0	1	0
130825101	1	0	1	1	1	0
130825101	0	1	0	1	3	1
130825101	0	0	3	0	2	0
130827101	2	2	2	1	3	1
130827101	3	0	3	2	3	2
130827101	0	1	2	0	2	2
130827101	0	3	3	3	3	3
130827101	3	2	3	3	2	3
130827101	3	2	1	3	2	0
130827102	1	0	0	0	1	0
130827102	1	0	1	0	0	0
130827102	1	0	0	0	1	0
130827102	1	1	0	0	0	0
130827102	0	1	0	0	0	0
130827102	3	3	0	0	3	0
130831101	1	0	0	1	2	0
130831101	1	0	3	0	2	0
130831101	0	0	0	0	1	0
130831101	2	0	0	2	3	0
130831101	1	1	1	1	1	0
130831101	1	1	1	1	3	1
130838102	0	0	0	0	0	0
130838102	0	0	0	0	0	0
130838102	1	1	1	1	2	2
130838102	3	3	0	0	0	0
130838102	0	0	0	0	0	0
130838102	1	3	1	1	1	3
130839101	0	0	0	0	0	0
130839101	0	0	0	0	0	0
130839101	1	1	2	1	2	0
130839101	1	3	0	1	3	0
130839101	0	0	3	0	0	0
130839101	0	0	0	0	0	0
130839102	3	1	1	2	3	0
130839102	0	2	0	0	0	0
130839102	0	0	1	0	0	0
130839102	3	0	0	0	0	0
130839102	3	2	1	0	3	0
130839102	0	0	0	0	2	1
130850102	1	2	1	1	1	1
130850102	1	1	0	1	1	1
130850102	2	1	1	1	1	1
130850102	2	0	1	1	1	0
130850102	1	1	0	1	1	1
130850102	0	2	2	0	2	1
130877102	1	1	1	0	1	0
130877102	0	0	2	2	0	1
130877102	2	2	0	0	0	0
130877102	2	0	0	0	0	0
130877102	0	0	0	0	1	0
130877102	0	0	2	2	0	2
130881101	0	0	0	0	0	0
130881101	0	0	0	0	0	0
130881101	1	1	1	0	0	1
130881101	2	1	2	1	0	0
130881101	1	2	1	3	0	0
130881101	0	1	1	2	0	1
130894102	0	0	0	0	0	0
130894102	0	0	1	1	1	0
130894102	2	1	1	0	1	1
130894102	0	0	0	1	0	0
130894102	1	0	1	1	2	1
130894102	1	0	2	1	3	1
130894103	0	0	0	0	0	0
130894103	0	0	2	1	1	0
130894103	2	1	1	1	1	1
130894103	0	0	0	0	0	0
130894103	2	1	0	0	0	0
130894103	2	1	1	1	2	1
130896105	0	0	0	0	2	1
130896105	0	1	2	2	2	0
130896105	1	1	1	0	0	0
130896105	1	0	1	1	3	0
130896105	1	1	2	1	2	1
130896105	1	1	2	1	1	1
130907103	0	2	0	0	0	0
130907103	1	0	0	0	0	0
130907103	0	0	0	0	0	0
130907103	1	0	0	0	0	0
130907103	0	3	2	1	3	0
130907103	0	0	0	0	0	0
130919102	1	1	1	0	1	0
130919102	0	0	1	0	1	0
130919102	1	0	1	0	0	0
130919102	3	2	0	0	0	0
130919102	0	2	0	1	1	0
130919102	0	0	0	0	1	0
130930101	1	0	0	0	0	0
130930101	0	1	3	3	1	0
130930101	1	1	1	1	1	1
130930101	1	1	1	2	1	1
130930101	3	0	3	3	1	0
130930101	1	0	3	1	1	0
140066102	0	2	2	1	1	1
140066102	1	0	1	0	0	0
140066102	0	0	1	2	1	0
140066102	0	0	0	0	3	0
140066102	3	2	3	3	3	0
140066102	1	0	1	1	3	0
140119101	0	0	0	0	0	0
140119101	0	0	1	1	2	1
140119101	0	0	0	0	0	0
140119101	1	2	0	1	2	0
140119101	1	0	2	1	1	0
140119101	0	2	0	0	0	0
140132101	1	2	2	1	1	1
140132101	1	1	1	1	1	1
140132101	0	0	0	0	1	0
140132101	1	1	1	1	1	1
140132101	1	3	2	1	2	2
140132101	1	2	1	1	2	0
140132102	1	1	1	1	0	0
140132102	1	1	1	1	1	0
140132102	1	1	1	0	0	0
140132102	1	0	0	0	1	0
140132102	1	1	0	0	3	0
140132102	1	1	0	0	2	0
140146102	0	0	0	0	0	0
140146102	0	0	0	0	0	0
140146102	1	0	0	0	1	1
140146102	3	0	0	1	1	0
140146102	1	0	2	1	0	0
140146102	1	0	0	0	0	0
140148102	1	2	2	0	2	0
140148102	0	0	0	0	0	0
140148102	0	0	0	0	0	0
140148102	0	0	0	1	1	0
140148102	0	0	0	0	0	0
140148102	0	0	1	1	0	1
140149101	0	0	1	1	0	0
140149101	0	0	0	0	0	0
140149101	0	0	0	0	1	0
140149101	1	1	1	1	1	0
140149101	0	0	0	0	3	0
140149101	1	0	1	1	1	0
140159102	0	0	0	0	0	0
140159102	0	0	0	0	0	0
140159102	0	0	0	0	0	0
140159102	1	0	0	1	1	0
140159102	0	1	0	0	0	0
140159102	0	1	0	0	2	0
140194102	0	0	0	0	0	0
140194102	0	0	0	0	2	0
140194102	0	1	0	0	0	0
140194102	1	2	0	0	2	0
140194102	1	2	1	1	1	1
140194102	0	3	0	3	3	0
140201102	2	0	1	0	2	0
140201102	0	0	0	0	2	0
140201102	1	1	1	1	1	1
140201102	0	3	3	1	1	0
140201102	3	3	3	2	3	2
140201102	2	1	2	1	1	0
140214101	1	1	1	0	2	1
140214101	1	0	1	0	2	0
140214101	0	0	0	0	1	1
140214101	1	3	1	1	2	0
140214101	0	1	3	1	3	0
140214101	0	2	1	0	0	0
140219101	1	0	1	0	1	0
140219101	0	0	1	0	2	0
140219101	0	0	0	1	2	0
140219101	0	1	0	1	0	0
140219101	1	0	0	0	0	0
140219101	0	0	0	0	0	0
140224101	1	1	1	1	2	1
140224101	1	0	1	0	0	0
140224101	1	1	1	0	1	1
140224101	1	0	0	0	0	0
140224101	2	3	3	3	2	2
140224101	1	0	2	3	2	1
140227101	3	1	1	1	0	0
140227101	1	0	0	0	2	0
140227101	0	0	1	0	0	0
140227101	2	2	1	1	1	1
140227101	2	3	3	2	0	1
140227101	2	3	0	3	0	0
140245101	0	2	1	0	2	0
140245101	3	0	0	3	3	0
140245101	3	0	1	2	3	1
140245101	3	2	1	2	2	1
140245101	3	3	0	3	3	1
140245101	2	0	2	2	2	0
140363101	0	0	0	0	0	0
140363101	0	0	0	0	0	0
140363101	0	0	0	0	1	0
140363101	2	1	1	1	1	1
140363101	1	2	1	1	1	2
140363101	0	2	1	1	0	1
140372101	0	0	0	0	0	0
140372101	0	0	0	0	1	0
140372101	0	0	0	0	0	0
140372101	0	0	0	0	0	0
140372101	0	0	0	0	1	0
140372101	1	1	0	0	1	0
140486104	0	0	0	0	1	0
140486104	0	0	0	0	0	0
140486104	1	0	0	0	0	0
140486104	0	0	0	1	0	0
140486104	0	0	0	0	1	0
140486104	0	0	0	0	0	0
140487101	0	0	0	0	0	0
140487101	0	0	0	0	0	0
140487101	1	1	1	0	0	0
140487101	0	0	0	1	0	0
140487101	0	0	0	0	0	0
140487101	1	0	0	1	0	0
140487102	0	0	0	0	0	0
140487102	0	0	0	0	0	0
140487102	0	0	0	0	0	0
140487102	0	1	0	0	0	0
140487102	0	0	0	0	0	0
140487102	0	1	0	0	0	0
140496101	0	0	0	0	0	0
140496101	0	0	0	0	0	0
140496101	1	1	1	1	1	1
140496101	0	1	0	0	1	0
140496101	0	1	0	0	0	0
140496101	0	0	0	0	0	0
140513102	0	0	0	0	0	0
140513102	0	0	0	0	1	0
140513102	0	0	0	0	0	0
140513102	0	3	0	0	0	3
140513102	1	0	0	0	0	0
140513102	0	1	0	0	0	0
140523101	1	2	2	0	1	0
140523101	0	1	0	0	1	0
140523101	2	2	2	0	1	0
140523101	2	3	1	2	1	1
140523101	1	3	0	1	1	0
140523101	0	3	0	0	0	0
140569102	0	1	1	0	2	0
140569102	2	0	3	0	2	1
140569102	1	3	3	0	2	0
140569102	1	3	0	1	3	0
140569102	2	2	1	1	2	1
140569102	1	2	1	0	0	0
140571102	0	0	0	0	1	0
140571102	0	0	1	0	1	0
140571102	1	0	0	0	0	0
140571102	0	0	1	1	1	0
140571102	0	0	1	0	2	0
140571102	2	0	0	1	0	0
140581101	0	0	0	0	1	0
140581101	0	0	0	0	1	0
140581101	1	1	1	1	1	1
140581101	0	3	1	2	1	1
140581101	2	2	0	1	1	0
140581101	0	3	0	0	2	0
140582101	0	0	0	0	1	0
140582101	0	0	0	0	0	0
140582101	0	0	0	0	0	0
140582101	1	0	1	0	0	0
140582101	0	0	0	2	0	0
140582101	0	0	0	0	0	0
140590101	1	0	1	0	2	0
140590101	0	0	1	0	1	0
140590101	0	0	0	0	0	0
140590101	1	3	0	1	3	1
140590101	1	3	1	0	3	0
140590101	0	1	0	0	0	0
140590102	1	0	1	0	2	0
140590102	0	0	1	0	1	0
140590102	0	0	0	0	0	0
140590102	1	0	0	0	3	0
140590102	1	0	1	0	1	0
140590102	0	0	1	0	1	0
140591101	1	0	1	0	2	0
140591101	0	0	2	0	1	0
140591101	0	0	0	0	0	0
140591101	1	0	0	0	1	0
140591101	1	0	0	1	1	0
140591101	0	0	0	0	0	0
140603101	0	0	2	0	2	2
140603101	0	1	1	1	1	1
140603101	0	0	0	0	0	0
140603101	1	3	1	1	1	0
140603101	1	1	0	0	1	0
140603101	1	1	1	1	1	1
140614102	0	0	0	0	1	0
140614102	0	1	0	0	0	0
140614102	0	0	0	0	1	0
140614102	2	2	1	1	1	1
140614102	0	3	0	1	1	0
140614102	0	1	0	0	1	0
140625101	1	1	0	0	1	0
140625101	0	0	2	0	2	0
140625101	0	1	1	2	2	1
140625101	2	3	3	3	2	1
140625101	1	1	1	1	1	1
140625101	3	2	0	2	2	2
140628101	0	0	0	1	0	0
140628101	0	0	1	0	0	0
140628101	0	0	0	0	0	0
140628101	0	0	0	0	0	0
140628101	1	0	0	0	1	0
140628101	0	0	0	0	1	1
140636101	0	0	0	0	0	0
140636101	1	0	2	1	2	2
140636101	0	0	0	0	0	0
140636101	0	3	0	0	3	0
140636101	0	3	1	0	2	0
140636101	0	3	0	0	0	0
140663101	2	1	1	0	0	0
140663101	1	0	0	0	0	0
140663101	1	1	1	1	2	1
140663101	1	0	0	0	1	0
140663101	3	1	0	0	3	1
140663101	1	1	1	1	3	1
140721101	0	0	1	0	2	0
140721101	0	0	1	0	1	0
140721101	0	0	0	0	0	0
140721101	1	0	0	0	0	0
140721101	0	0	0	0	0	0
140721101	0	2	0	0	0	0
140721102	0	1	1	0	2	1
140721102	1	0	2	0	3	0
140721102	2	2	2	1	1	0
140721102	1	0	0	0	0	0
140721102	2	3	1	1	2	0
140721102	0	1	0	0	0	0
140733101	0	0	0	0	0	0
140733101	0	0	0	0	0	0
140733101	0	0	0	0	0	0
140733101	0	0	0	2	1	0
140733101	1	0	0	0	3	0
140733101	0	0	0	0	0	0
140733102	3	0	0	0	0	1
140733102	0	0	3	0	3	0
140733102	0	0	0	0	0	0
140733102	0	3	1	1	1	0
140733102	2	3	1	1	1	0
140733102	1	3	1	1	1	0
140794101	1	1	0	0	0	0
140794101	0	0	0	0	1	0
140794101	0	0	0	0	0	0
140794101	2	2	0	1	1	0
140794101	0	1	0	0	0	0
140794101	1	0	0	0	1	0
210097101	1	1	1	1	2	0
210097101	0	1	0	1	0	0
210097101	0	0	0	0	0	0
210097101	1	0	0	0	0	0
210097101	1	0	0	0	1	0
210097101	1	0	0	0	1	0
210098103	1	1	0	0	2	1
210098103	0	0	0	0	3	0
210098103	1	0	0	2	1	1
210098103	2	1	0	1	1	0
210098103	1	3	0	0	2	0
210098103	1	3	3	1	3	1
210103101	0	1	1	1	1	1
210103101	3	1	1	1	0	1
210103101	1	1	1	1	1	0
210103101	3	2	2	2	2	3
210103101	1	3	2	1	3	2
210103101	2	0	3	1	3	1
210104101	0	0	0	0	0	0
210104101	0	1	1	0	0	0
210104101	1	1	1	0	1	0
210104101	3	0	1	1	1	1
210104101	1	0	0	1	1	0
210104101	1	1	1	2	3	1
210116101	1	1	1	1	1	0
210116101	0	0	1	0	2	1
210116101	0	0	0	0	0	0
210116101	1	0	0	1	2	0
210116101	2	0	3	3	2	2
210116101	2	1	1	1	3	1
210146101	0	0	0	0	0	0
210146101	0	0	0	0	0	0
210146101	0	0	0	0	0	0
210146101	1	0	0	0	1	0
210146101	2	2	3	2	2	0
210146101	2	1	1	1	2	0
210146102	1	1	1	0	0	1
210146102	0	1	1	1	1	0
210146102	1	0	0	0	0	0
210146102	1	0	0	1	1	0
210146102	2	2	2	1	2	3
210146102	2	1	2	1	2	2
210149101	0	0	0	0	1	0
210149101	1	0	1	0	1	0
210149101	0	0	0	0	1	0
210149101	1	0	0	0	1	0
210149101	1	0	0	0	1	0
210149101	0	0	0	0	1	3
210166102	0	0	0	0	1	0
210166102	0	0	0	0	0	0
210166102	1	0	0	0	1	0
210166102	1	0	0	0	0	0
210166102	0	0	0	1	0	0
210166102	1	0	1	0	1	0
210261101	1	1	1	2	1	0
210261101	0	0	0	0	0	0
210261101	1	1	1	0	0	0
210261101	0	1	0	1	0	0
210261101	0	1	1	0	2	0
210261101	0	0	0	0	0	0
210269101	1	0	0	0	0	0
210269101	0	0	0	0	3	0
210269101	0	0	0	0	0	0
210269101	0	1	0	0	0	0
210269101	0	1	0	0	1	0
210269101	0	0	0	0	0	0
210271101	0	0	0	0	1	0
210271101	0	0	0	0	1	0
210271101	1	1	0	0	1	0
210271101	0	1	1	1	0	0
210271101	1	1	1	1	1	0
210271101	0	0	0	0	1	0
210313101	0	1	1	0	0	0
210313101	0	0	0	0	0	0
210313101	0	0	0	0	0	0
210313101	0	1	0	0	0	0
210313101	0	1	0	0	0	0
210313101	0	1	0	0	0	0
210317101	0	0	1	0	0	0
210317101	0	0	0	0	0	0
210317101	0	0	0	0	0	0
210317101	0	1	0	1	0	0
210317101	0	0	0	0	0	0
210317101	0	0	0	0	0	0
210317102	0	0	0	0	0	0
210317102	0	0	0	0	0	0
210317102	0	0	0	0	0	0
210317102	0	1	0	0	0	0
210317102	0	1	0	0	0	0
210317102	0	0	0	0	0	0
210331101	0	0	0	0	0	0
210331101	0	0	0	0	0	0
210331101	1	0	0	0	0	0
210331101	0	1	0	0	0	0
210331101	0	1	0	0	0	0
210331101	0	1	0	0	1	0
210331102	0	0	0	0	0	0
210331102	0	0	0	0	0	0
210331102	0	1	1	0	0	0
210331102	0	0	0	0	0	0
210331102	1	2	0	1	1	0
210331102	1	1	0	0	1	0
210339101	1	0	0	0	0	0
210339101	0	1	2	0	0	0
210339101	0	0	0	0	0	0
210339101	0	1	1	0	0	0
210339101	0	0	0	0	0	0
210339101	1	0	0	0	0	0
210342101	1	0	0	0	0	1
210342101	1	1	1	1	0	1
210342101	0	0	0	0	0	0
210342101	2	2	1	1	1	0
210342101	0	2	0	2	0	0
210342101	3	3	3	1	0	0
210342102	0	0	0	0	0	0
210342102	0	0	0	0	0	0
210342102	0	0	0	0	0	0
210342102	1	1	0	0	0	0
210342102	0	0	0	0	0	0
210342102	0	3	0	0	0	0
210353101	3	0	0	0	0	0
210353101	0	0	0	0	0	0
210353101	0	0	0	0	0	0
210353101	0	1	0	0	0	0
210353101	1	0	0	0	0	0
210353101	0	0	0	0	0	0
210353102	0	0	0	0	0	0
210353102	0	0	1	0	1	0
210353102	0	0	0	0	0	0
210353102	0	0	0	0	0	0
210353102	0	1	0	0	0	0
210353102	1	0	0	0	0	0
210402101	0	0	0	0	0	0
210402101	0	0	1	0	1	0
210402101	0	0	0	0	0	0
210402101	1	0	0	1	0	0
210402101	3	0	0	0	0	0
210402101	1	0	0	0	0	0
210402102	0	0	0	0	0	0
210402102	0	0	0	0	0	0
210402102	0	0	0	0	0	0
210402102	0	0	0	0	0	0
210402102	0	0	0	0	0	0
210402102	0	0	0	0	0	0
210415101	2	2	2	2	0	0
210415101	0	0	0	0	0	0
210415101	0	0	0	0	0	0
210415101	0	0	0	0	0	0
210415101	0	0	0	0	0	0
210415101	0	0	0	0	0	0
210423102	0	0	0	0	0	0
210423102	0	0	0	1	0	0
210423102	0	0	0	0	0	0
210423102	1	0	0	0	0	0
210423102	0	0	0	0	0	0
210423102	0	0	0	0	1	0
210424101	2	0	1	0	0	0
210424101	0	0	0	0	0	0
210424101	1	1	1	1	1	1
210424101	2	3	1	1	0	0
210424101	2	2	0	0	0	0
210424101	0	3	0	0	0	0
210424102	0	1	3	2	0	1
210424102	0	1	2	1	1	0
210424102	1	1	1	0	1	0
210424102	2	1	0	2	0	1
210424102	0	1	1	1	0	0
210424102	0	0	0	1	0	1
210426101	1	0	1	2	0	0
210426101	1	0	3	1	1	0
210426101	1	1	1	0	1	1
210426101	0	1	1	1	2	1
210426101	2	0	1	1	3	1
210426101	1	0	0	1	0	1
210437101	1	0	0	0	0	0
210437101	0	0	0	0	1	0
210437101	0	0	0	0	0	0
210437101	1	0	0	0	0	0
210437101	0	0	0	0	3	0
210437101	0	0	0	0	3	0
210437102	0	0	0	0	0	0
210437102	1	1	2	1	3	0
210437102	0	0	0	0	0	0
210437102	0	2	0	0	0	0
210437102	0	1	0	0	3	0
210437102	0	3	0	0	3	0
210456101	1	1	1	1	0	1
210456101	1	0	0	0	1	0
210456101	0	0	0	0	0	0
210456101	0	0	0	0	0	0
210456101	2	0	0	1	2	0
210456101	1	0	0	0	2	0
210457101	0	0	0	0	0	0
210457101	0	1	1	1	0	0
210457101	0	1	1	0	0	0
210457101	0	3	1	1	1	0
210457101	0	0	3	0	0	0
210457101	0	0	0	0	0	0
210459101	1	1	0	1	1	0
210459101	0	0	0	0	2	0
210459101	0	0	0	0	0	0
210459101	2	2	1	1	2	0
210459101	1	0	0	0	1	0
210459101	0	0	0	0	0	0
210459102	2	2	0	2	2	2
210459102	0	0	1	1	0	0
210459102	1	2	1	0	0	0
210459102	0	0	0	3	3	0
210459102	0	0	0	0	0	0
210459102	1	0	0	0	2	0
210463101	0	0	0	0	0	0
210463101	0	0	0	1	0	0
210463101	0	0	0	0	0	0
210463101	2	3	1	1	2	0
210463101	0	0	0	0	0	0
210463101	1	0	1	0	0	0
210540101	1	1	2	1	1	1
210540101	1	1	1	1	1	1
210540101	0	0	0	0	0	0
210540101	1	1	0	0	1	0
210540101	1	2	1	1	1	0
210540101	1	3	2	1	3	1
210596101	0	0	0	0	0	0
210596101	0	0	0	0	0	0
210596101	1	1	0	0	1	0
210596101	1	1	0	1	1	0
210596101	1	1	1	1	1	1
210596101	1	1	0	1	1	1
210600101	0	0	0	0	0	0
210600101	0	0	0	0	1	0
210600101	0	0	0	0	0	0
210600101	0	0	0	0	0	0
210600101	1	1	0	0	2	0
210600101	1	1	1	0	2	0
210614101	0	0	0	0	0	0
210614101	0	0	0	0	0	0
210614101	1	0	0	0	0	0
210614101	0	0	0	0	0	0
210614101	1	0	0	0	0	0
210614101	1	0	0	0	0	0
210614102	0	0	0	0	0	0
210614102	0	0	0	0	0	0
210614102	0	0	0	0	0	0
210614102	1	0	0	1	1	0
210614102	0	0	0	0	1	0
210614102	0	0	0	0	0	0
210616102	0	2	1	0	1	1
210616102	1	1	1	1	1	1
210616102	2	2	2	2	2	2
210616102	3	1	1	1	3	0
210616102	1	3	1	1	3	3
210616102	2	0	3	1	1	0
210617101	0	0	0	0	0	0
210617101	0	0	0	0	0	0
210617101	0	0	0	0	0	0
210617101	0	2	0	0	0	0
210617101	1	3	0	1	3	0
210617101	1	0	0	0	1	0
210617102	0	0	0	0	0	0
210617102	0	0	0	0	0	0
210617102	0	0	0	0	0	0
210617102	2	1	0	1	1	0
210617102	0	2	0	0	2	0
210617102	1	0	0	0	0	0
210633101	1	0	1	0	1	1
210633101	1	1	3	0	1	0
210633101	1	0	0	0	0	1
210633101	2	0	1	1	1	0
210633101	1	0	1	0	0	0
210633101	1	0	1	1	1	0
210653101	0	0	0	0	0	0
210653101	0	0	2	0	0	0
210653101	0	0	0	0	0	0
210653101	0	0	0	0	0	0
210653101	0	3	0	0	0	0
210653101	0	1	0	0	1	0
210653102	0	0	0	0	0	0
210653102	0	0	0	0	0	0
210653102	0	0	0	0	0	0
210653102	1	1	0	0	0	0
210653102	0	1	0	0	0	0
210653102	0	1	0	1	2	0
210655102	2	1	0	0	0	2
210655102	0	0	0	0	0	0
210655102	0	0	0	0	0	0
210655102	2	3	0	0	0	0
210655102	1	2	3	0	1	0
210655102	0	0	3	0	0	0
210657101	0	0	0	0	0	0
210657101	0	0	1	0	1	0
210657101	0	0	0	0	0	0
210657101	1	0	0	0	0	0
210657101	0	0	0	0	0	0
210657101	0	1	0	0	1	0
210674101	1	0	0	0	1	0
210674101	0	0	0	0	0	0
210674101	1	0	0	0	0	0
210674101	0	0	0	0	0	0
210674101	0	0	0	1	0	0
210674101	1	0	0	1	3	0
210726101	0	0	0	0	0	0
210726101	0	0	3	0	3	0
210726101	1	0	0	0	0	0
210726101	2	1	0	0	0	0
210726101	3	3	0	3	3	0
210726101	1	1	0	0	1	0
210734101	0	0	1	0	1	0
210734101	0	0	0	0	2	0
210734101	2	2	1	0	0	0
210734101	2	2	3	1	3	0
210734101	2	3	3	1	2	0
210734101	1	2	1	1	1	1
210738101	0	0	0	0	1	1
210738101	0	0	0	0	1	0
210738101	0	0	0	0	1	0
210738101	1	0	0	0	0	0
210738101	0	0	0	0	0	0
210738101	3	0	0	0	0	3
210738102	0	0	0	0	0	1
210738102	0	0	1	0	1	0
210738102	1	0	0	0	0	0
210738102	1	0	1	1	2	1
210738102	0	3	0	0	1	1
210738102	1	1	1	1	1	1
210741103	0	1	1	0	0	0
210741103	0	0	0	0	0	0
210741103	0	0	1	0	0	0
210741103	0	0	0	0	0	0
210741103	0	0	0	0	0	0
210741103	0	0	3	0	2	0
210752102	2	2	2	1	1	1
210752102	0	0	1	0	1	0
210752102	0	0	0	0	0	0
210752102	1	1	1	1	3	0
210752102	0	1	0	0	0	0
210752102	1	1	0	0	3	1
210753102	1	0	0	0	0	0
210753102	1	1	3	1	3	0
210753102	1	1	1	1	1	1
210753102	1	0	0	0	0	0
210753102	1	1	0	0	1	0
210753102	0	0	0	0	2	0
210753103	1	1	1	0	0	0
210753103	0	0	0	0	1	0
210753103	2	1	1	0	2	0
210753103	1	1	0	1	2	0
210753103	2	2	0	0	2	0
210753103	3	0	1	0	3	0
210760101	0	0	0	0	0	0
210760101	1	0	2	2	2	0
210760101	0	0	0	0	0	0
210760101	0	0	0	0	0	0
210760101	0	0	0	0	3	0
210760101	3	1	1	1	3	1
210760102	0	0	0	0	0	0
210760102	0	0	1	0	0	0
210760102	0	0	0	0	0	0
210760102	0	0	0	0	0	0
210760102	0	0	0	0	0	0
210760102	0	0	0	0	0	0
210763101	1	0	0	0	0	0
210763101	0	0	1	0	1	0
210763101	0	0	0	0	0	0
210763101	0	0	0	0	1	0
210763101	1	0	0	0	0	0
210763101	1	1	0	1	1	0
210763102	0	0	0	0	0	0
210763102	0	0	0	0	1	0
210763102	0	0	0	0	0	0
210763102	1	0	0	0	1	0
210763102	0	0	0	0	0	0
210763102	2	1	3	3	3	3
210766102	2	2	2	1	3	1
210766102	0	0	0	0	3	0
210766102	3	0	2	3	3	3
210766102	2	2	1	1	1	0
210766102	1	1	0	0	2	0
210766102	2	2	1	3	2	3
210829101	0	0	0	1	1	1
210829101	0	0	0	1	0	0
210829101	0	0	0	0	0	0
210829101	0	0	0	0	0	0
210829101	2	0	0	0	1	0
210829101	0	0	1	0	0	0
210866101	0	0	0	0	0	0
210866101	0	0	0	0	0	0
210866101	0	1	1	0	0	0
210866101	0	0	0	0	0	0
210866101	0	0	0	0	0	0
210866101	0	0	0	0	0	0
210866102	1	1	0	0	0	0
210866102	0	0	2	0	2	0
210866102	1	0	0	1	1	1
210866102	0	1	0	2	2	0
210866102	0	0	0	0	2	0
210866102	1	0	0	0	3	0
210890101	0	0	0	0	0	0
210890101	0	0	0	0	1	0
210890101	1	0	0	0	0	0
210890101	0	0	0	0	0	0
210890101	0	0	0	0	0	0
210890101	0	0	0	0	0	0
210918103	0	0	0	0	0	0
210918103	0	3	1	2	2	0
210918103	1	0	0	0	0	1
210918103	0	0	0	0	0	0
210918103	0	0	0	0	1	0
210918103	0	0	0	0	0	0
210919102	0	0	0	0	0	0
210919102	0	0	0	0	0	0
210919102	3	3	3	3	3	3
210919102	0	3	0	0	0	0
210919102	0	2	2	0	2	0
210919102	0	0	0	0	0	0
210934101	0	0	0	0	1	0
210934101	0	0	1	0	0	0
210934101	0	1	0	0	0	0
210934101	0	0	0	0	0	0
210934101	0	0	0	1	0	0
210934101	0	0	0	0	0	0
210934102	0	0	0	0	0	0
210934102	0	0	0	0	1	0
210934102	2	2	2	0	0	0
210934102	0	0	0	1	1	1
210934102	0	1	0	0	1	0
210934102	0	0	0	0	0	0
210974101	0	0	0	0	0	0
210974101	0	0	1	0	1	0
210974101	0	0	0	0	0	0
210974101	1	1	0	0	0	0
210974101	0	0	0	0	0	0
210974101	0	1	0	0	0	0
210994102	2	2	2	0	0	0
210994102	1	1	1	1	1	0
210994102	1	2	1	1	1	1
210994102	3	2	3	3	3	0
210994102	3	3	3	3	1	3
210994102	2	3	3	3	3	3
210998101	0	0	0	0	0	0
210998101	0	0	0	0	0	0
210998101	0	0	0	0	0	0
210998101	0	0	0	0	0	0
210998101	0	0	0	0	1	0
210998101	0	2	0	0	2	1
211041101	0	0	0	0	0	0
211041101	1	0	1	1	1	1
211041101	1	1	1	0	1	2
211041101	2	0	2	1	2	0
211041101	3	0	0	1	3	1
211041101	0	0	0	0	0	0
211062101	1	1	1	1	1	1
211062101	0	1	0	1	2	0
211062101	2	2	2	1	0	1
211062101	0	3	0	1	1	0
211062101	1	1	1	1	1	0
211062101	2	3	3	0	3	0
211063101	1	0	0	0	0	0
211063101	2	0	1	0	2	0
211063101	2	0	2	2	2	2
211063101	0	3	0	2	3	0
211063101	1	1	0	1	3	0
211063101	1	0	0	0	0	0
211063102	1	0	0	0	0	1
211063102	0	1	0	1	0	0
211063102	2	2	0	1	1	1
211063102	0	1	1	1	0	0
211063102	1	1	0	1	1	0
211063102	1	0	0	1	1	0
211068101	0	0	0	0	0	0
211068101	0	0	0	0	0	0
211068101	0	0	0	0	0	0
211068101	0	0	0	0	0	0
211068101	1	3	0	0	1	0
211068101	0	0	0	0	0	0
211070101	1	1	1	0	1	2
211070101	1	1	1	2	1	0
211070101	1	1	1	2	2	1
211070101	1	1	1	1	1	0
211070101	2	3	0	3	3	0
211070101	1	3	0	0	1	0
211071102	0	0	1	0	0	0
211071102	0	1	1	1	1	0
211071102	0	0	0	0	0	0
211071102	0	2	0	1	0	0
211071102	1	1	1	0	1	0
211071102	1	2	0	0	2	0
211078102	1	1	1	0	1	0
211078102	0	0	1	0	0	0
211078102	0	0	0	0	0	0
211078102	0	0	0	0	0	0
211078102	1	0	0	1	0	0
211078102	1	1	1	0	1	0
211083102	0	0	0	0	0	0
211083102	0	0	1	0	0	0
211083102	0	0	0	0	0	0
211083102	0	0	0	0	0	0
211083102	1	0	0	0	0	0
211083102	0	1	1	1	0	1
211106101	0	0	0	0	0	0
211106101	0	0	0	0	0	0
211106101	1	0	0	0	0	0
211106101	1	0	0	0	0	0
211106101	0	0	0	0	3	0
211106101	1	0	1	0	0	0
211244102	0	0	0	0	0	0
211244102	1	1	2	0	1	0
211244102	1	0	0	0	0	0
211244102	1	1	0	1	0	0
211244102	0	0	0	0	0	0
211244102	1	1	1	1	2	0
211281103	3	3	3	1	1	0
211281103	0	0	0	0	1	0
211281103	2	1	0	0	0	0
211281103	0	0	0	0	0	0
211281103	1	0	0	0	0	0
211281103	1	0	0	0	1	0
211312101	0	0	0	0	0	0
211312101	0	0	0	1	1	0
211312101	1	0	0	0	0	0
211312101	0	0	0	0	0	0
211312101	0	0	0	0	2	0
211312101	0	0	0	0	1	0
211315101	0	0	0	0	0	0
211315101	0	0	0	0	0	0
211315101	3	2	2	3	0	3
211315101	1	2	1	2	3	0
211315101	1	1	0	1	3	0
211315101	3	3	3	3	3	3
211316101	0	0	0	0	0	0
211316101	0	0	1	1	0	0
211316101	0	0	0	0	0	0
211316101	0	0	0	0	0	0
211316101	0	0	0	0	0	0
211316101	1	0	0	0	0	0
211317101	0	0	0	0	0	0
211317101	0	0	0	0	0	0
211317101	0	0	0	0	0	0
211317101	0	0	0	0	0	0
211317101	0	0	0	0	0	0
211317101	0	0	0	0	0	0
211324101	0	0	0	0	0	0
211324101	0	0	1	2	3	0
211324101	0	0	0	0	0	0
211324101	1	1	1	1	1	0
211324101	0	0	0	0	0	0
211324101	0	0	0	0	0	0
211358102	0	0	0	0	0	0
211358102	0	0	2	0	0	0
211358102	2	0	1	0	0	2
211358102	0	3	1	1	0	0
211358102	0	1	0	0	0	0
211358102	1	2	0	0	0	0
211359101	0	0	0	0	0	0
211359101	0	0	0	0	0	0
211359101	0	0	0	0	0	0
211359101	1	0	0	0	0	0
211359101	1	0	0	0	0	0
211359101	0	0	0	0	0	0
211359102	0	0	0	0	0	0
211359102	0	0	0	0	0	0
211359102	0	0	0	0	0	0
211359102	1	0	0	0	0	0
211359102	0	0	0	0	0	0
211359102	0	0	0	0	0	0
211374101	0	0	1	0	0	0
211374101	0	0	1	1	1	0
211374101	2	2	3	0	1	0
211374101	2	3	1	2	3	3
211374101	3	1	1	1	3	0
211374101	0	0	0	0	2	0
211375101	0	0	0	0	0	0
211375101	0	0	3	0	0	0
211375101	2	1	0	0	0	0
211375101	0	0	0	0	0	0
211375101	0	0	0	0	0	0
211375101	1	0	1	1	3	0
211384102	0	1	1	0	1	0
211384102	0	1	1	1	1	0
211384102	1	0	1	1	1	0
211384102	0	0	0	0	0	0
211384102	0	1	0	0	1	0
211384102	1	0	0	0	0	0
211409102	1	2	2	1	3	1
211409102	0	0	0	0	0	0
211409102	0	0	0	0	0	0
211409102	0	3	1	1	1	0
211409102	0	1	1	1	1	0
211409102	1	3	2	1	2	1
211417102	0	0	1	0	2	1
211417102	0	0	0	0	0	0
211417102	0	0	0	0	0	0
211417102	1	1	0	0	3	0
211417102	0	0	0	0	0	0
211417102	1	1	2	1	3	1
211424103	1	0	1	2	0	2
211424103	1	0	3	0	0	0
211424103	1	0	1	0	1	1
211424103	0	1	0	1	3	0
211424103	2	0	0	1	2	0
211424103	1	0	0	0	1	0
211424104	0	0	0	0	0	0
211424104	0	0	0	0	0	0
211424104	0	0	0	0	0	0
211424104	0	0	0	0	0	0
211424104	0	0	0	0	0	0
211424104	0	0	0	0	0	0
211438102	1	1	1	1	1	1
211438102	0	0	0	0	0	0
211438102	1	1	1	0	1	1
211438102	2	3	3	2	2	3
211438102	2	1	0	2	1	1
211438102	2	1	3	2	3	3
211467101	2	0	0	0	0	0
211467101	0	0	0	0	0	0
211467101	0	0	0	0	0	0
211467101	1	1	1	1	1	1
211467101	1	0	1	1	1	0
211467101	3	1	1	1	1	1
211496102	0	0	0	0	0	0
211496102	3	0	3	0	2	0
211496102	1	0	0	0	0	0
211496102	0	0	0	0	0	0
211496102	3	3	3	0	3	3
211496102	3	1	0	0	0	0
211496105	1	1	1	1	1	1
211496105	0	0	0	0	0	1
211496105	1	1	1	1	0	1
211496105	1	1	0	1	1	0
211496105	0	1	0	1	0	1
211496105	0	1	0	1	0	0
211499105	2	2	2	1	2	2
211499105	3	0	3	3	2	3
211499105	2	2	2	1	2	0
211499105	1	1	0	1	3	0
211499105	0	2	0	0	1	0
211499105	0	2	3	3	3	0
211513102	2	2	2	2	2	2
211513102	2	0	0	1	1	1
211513102	2	1	1	1	2	0
211513102	3	0	3	2	3	1
211513102	1	2	2	1	2	0
211513102	1	2	1	1	2	1
211524102	2	1	1	1	0	0
211524102	0	0	1	0	2	0
211524102	0	1	1	0	1	0
211524102	0	3	1	2	1	0
211524102	2	1	1	2	1	0
211524102	3	1	2	3	1	1
211533101	1	0	0	0	0	0
211533101	0	1	1	1	1	0
211533101	3	1	1	2	2	2
211533101	3	2	2	3	2	1
211533101	1	3	2	1	0	0
211533101	1	3	3	3	3	2
211533102	0	0	0	0	0	0
211533102	0	0	0	0	0	0
211533102	0	0	0	0	0	0
211533102	2	0	0	0	0	0
211533102	0	0	0	0	0	0
211533102	0	0	0	0	0	0
211582101	0	0	0	0	0	0
211582101	0	0	1	0	0	0
211582101	0	0	0	0	0	0
211582101	0	0	0	1	0	0
211582101	0	0	0	0	0	0
211582101	0	0	0	0	0	0
211601104	0	0	0	0	0	0
211601104	0	0	0	1	0	0
211601104	1	0	0	0	1	0
211601104	0	0	0	0	1	0
211601104	0	0	0	0	0	0
211601104	0	3	0	1	1	0
211603101	1	1	2	2	1	0
211603101	0	0	0	0	0	0
211603101	0	0	0	0	0	0
211603101	0	1	0	1	0	0
211603101	0	0	0	0	0	0
211603101	1	1	0	0	0	0
211616101	1	1	1	1	1	0
211616101	0	0	3	2	1	0
211616101	1	0	0	0	0	0
211616101	1	0	0	1	1	0
211616101	1	1	1	0	0	0
211616101	1	1	1	0	1	0
211616102	1	0	0	2	0	0
211616102	0	0	1	1	2	0
211616102	1	0	0	0	0	0
211616102	1	3	1	1	1	0
211616102	2	3	1	1	2	0
211616102	0	3	1	1	1	0
211651101	3	0	0	0	0	0
211651101	0	0	1	0	1	0
211651101	0	0	0	0	0	0
211651101	1	0	1	1	1	0
211651101	0	0	0	0	0	0
211651101	1	0	0	0	0	0
211651102	0	0	0	0	0	0
211651102	0	0	0	0	0	0
211651102	0	0	0	0	0	0
211651102	0	0	0	0	0	0
211651102	2	0	0	3	0	0
211651102	0	0	0	0	0	0
211652101	0	0	0	0	0	0
211652101	0	0	1	0	0	0
211652101	0	0	0	0	0	0
211652101	0	1	0	1	0	0
211652101	0	0	0	0	0	0
211652101	0	0	0	0	0	0
211652102	0	1	0	0	0	0
211652102	0	1	1	0	1	0
211652102	0	0	0	0	0	0
211652102	0	2	0	0	0	0
211652102	1	1	0	0	0	0
211652102	1	1	0	0	1	0
211654103	0	0	0	0	0	0
211654103	1	0	1	0	1	0
211654103	0	0	0	0	0	0
211654103	0	0	0	0	0	0
211654103	0	0	0	0	0	0
211654103	1	1	0	0	1	0
211672101	1	1	0	0	0	0
211672101	0	0	1	1	0	0
211672101	0	0	1	0	0	1
211672101	1	3	0	1	0	0
211672101	0	2	0	0	0	0
211672101	0	2	0	0	1	0
211672102	1	0	0	0	0	0
211672102	0	0	0	0	0	0
211672102	0	0	0	0	0	0
211672102	0	0	0	0	0	0
211672102	0	0	0	0	0	0
211672102	0	0	0	0	0	0
211673101	0	0	0	0	0	0
211673101	0	0	0	0	0	0
211673101	1	0	0	0	1	0
211673101	0	0	0	0	0	0
211673101	0	1	0	0	0	0
211673101	0	0	0	0	1	0
211673102	1	1	0	2	0	0
211673102	0	0	0	0	0	0
211673102	1	2	2	0	3	0
211673102	0	1	1	1	1	0
211673102	1	1	0	1	1	0
211673102	0	0	0	0	0	0
211677101	0	0	0	0	1	0
211677101	0	0	0	0	0	0
211677101	1	0	0	0	0	0
211677101	0	1	1	0	0	0
211677101	0	2	0	0	1	0
211677101	2	1	1	1	2	1
211697101	0	1	2	0	0	0
211697101	0	1	0	0	0	0
211697101	1	1	1	0	0	0
211697101	0	3	1	1	0	0
211697101	1	1	0	0	0	0
211697101	1	1	0	0	1	0
211697102	0	0	0	0	0	0
211697102	0	1	0	0	0	0
211697102	1	0	3	0	0	0
211697102	0	3	0	1	0	0
211697102	1	2	0	0	1	0
211697102	1	1	0	0	1	0
211705101	0	0	0	0	0	0
211705101	0	0	0	0	1	0
211705101	1	0	0	0	0	0
211705101	1	0	0	0	0	0
211705101	0	0	0	0	0	0
211705101	0	3	0	0	1	0
211705102	0	0	0	0	0	0
211705102	1	1	1	2	1	1
211705102	1	2	2	2	2	1
211705102	3	0	0	0	0	1
211705102	0	0	0	0	0	0
211705102	1	0	0	0	1	0
211714102	0	0	0	0	0	0
211714102	0	0	0	0	1	0
211714102	1	0	1	0	1	0
211714102	0	1	0	0	0	0
211714102	0	3	0	0	0	0
211714102	0	1	0	1	0	1
211719101	1	0	0	1	1	1
211719101	0	0	0	0	0	0
211719101	1	1	1	1	1	1
211719101	2	1	1	1	1	0
211719101	1	3	0	0	1	0
211719101	1	1	1	1	1	0
211765101	2	2	1	0	1	1
211765101	0	0	3	3	0	0
211765101	0	0	0	0	0	0
211765101	3	3	0	0	0	0
211765101	0	0	0	0	0	0
211765101	0	0	0	0	0	0
211773103	0	0	0	0	0	0
211773103	3	0	3	0	3	0
211773103	1	1	1	0	0	0
211773103	0	0	0	0	0	0
211773103	1	0	0	1	3	0
211773103	0	0	0	0	0	0
211780102	1	1	1	0	0	2
211780102	0	0	0	0	0	0
211780102	0	0	0	0	0	0
211780102	1	0	0	1	0	0
211780102	1	0	0	1	1	1
211780102	1	0	0	0	2	0
211784102	2	2	0	0	0	0
211784102	0	0	0	2	2	0
211784102	0	0	0	0	0	0
211784102	1	0	1	0	3	0
211784102	0	0	0	0	0	0
211784102	1	1	0	1	1	0
211837102	0	0	0	0	0	0
211837102	0	0	0	0	1	0
211837102	0	0	0	0	0	0
211837102	0	0	0	0	0	0
211837102	0	0	0	0	1	0
211837102	0	0	0	0	0	0
211837103	0	0	0	0	0	0
211837103	1	0	2	0	0	0
211837103	0	0	0	0	0	0
211837103	0	1	0	0	0	0
211837103	0	1	1	1	0	0
211837103	0	0	0	0	0	0
211850101	2	0	0	0	0	0
211850101	1	0	2	0	2	0
211850101	1	1	1	2	1	0
211850101	1	0	0	0	0	0
211850101	1	2	1	1	1	0
211850101	2	2	2	1	2	0
211884101	1	0	0	0	0	0
211884101	1	0	0	0	1	0
211884101	0	0	0	0	0	0
211884101	0	0	1	1	0	0
211884101	1	0	1	0	1	0
211884101	1	1	1	1	1	0
211885101	0	0	0	2	3	2
211885101	0	0	1	0	3	0
211885101	0	0	0	0	2	1
211885101	2	2	1	1	1	1
211885101	0	0	0	0	0	0
211885101	1	1	1	1	2	1
211923101	0	0	0	0	0	0
211923101	0	0	0	0	0	0
211923101	0	0	0	0	0	0
211923101	0	3	0	0	0	0
211923101	0	2	0	0	1	0
211923101	0	1	0	0	2	0
211929101	1	2	0	0	0	3
211929101	0	0	0	0	2	0
211929101	0	1	0	0	0	0
211929101	0	1	0	1	0	0
211929101	1	0	0	0	0	0
211929101	1	1	0	0	1	0
220060101	0	0	0	0	0	0
220060101	0	0	0	1	0	0
220060101	0	0	0	0	0	0
220060101	0	0	0	0	0	0
220060101	0	0	0	0	0	0
220060101	0	0	0	0	1	0
220060102	0	0	0	0	0	0
220060102	0	0	0	0	0	0
220060102	2	2	2	2	0	2
220060102	1	3	3	2	3	2
220060102	1	1	0	0	2	0
220060102	0	3	0	0	3	0
220081101	0	0	0	0	0	0
220081101	0	0	1	0	0	0
220081101	0	0	0	0	0	0
220081101	2	0	1	2	0	0
220081101	1	0	0	3	1	0
220081101	0	0	1	1	1	0
220091104	0	0	0	0	0	0
220091104	0	0	0	0	0	0
220091104	0	0	0	0	0	0
220091104	0	0	0	0	2	0
220091104	0	0	0	0	0	0
220091104	0	2	0	0	2	0
220137101	1	1	1	0	1	1
220137101	1	1	2	2	2	0
220137101	1	1	1	1	2	2
220137101	3	0	1	1	1	0
220137101	3	3	0	0	2	0
220137101	2	0	2	2	1	3
220165102	1	1	1	1	2	1
220165102	0	0	1	0	0	0
220165102	1	0	1	1	0	0
220165102	3	1	0	1	2	0
220165102	1	1	0	1	1	0
220165102	0	1	0	0	0	0
220186102	1	0	0	0	0	0
220186102	0	0	1	0	1	0
220186102	1	0	0	0	0	0
220186102	1	0	0	0	0	0
220186102	0	0	0	0	0	0
220186102	2	0	0	0	1	0
220186103	0	0	0	0	0	0
220186103	1	0	1	0	1	0
220186103	0	0	1	0	0	0
220186103	1	2	0	0	0	0
220186103	1	1	0	1	2	0
220186103	0	0	0	0	0	0
220257101	0	0	0	0	0	0
220257101	0	0	0	0	0	0
220257101	1	1	0	0	0	1
220257101	0	0	0	0	0	0
220257101	0	0	0	0	0	0
220257101	0	0	1	0	0	0
220287102	0	0	0	0	0	0
220287102	0	0	0	0	0	0
220287102	1	1	0	0	0	0
220287102	0	3	0	0	0	0
220287102	0	1	1	1	1	0
220287102	1	1	0	0	1	0
220290101	0	0	1	0	0	0
220290101	1	0	1	0	1	0
220290101	0	0	0	0	0	0
220290101	0	0	0	1	0	0
220290101	1	0	1	0	1	0
220290101	0	0	0	0	0	0
220323101	0	0	0	0	0	0
220323101	0	0	1	0	0	0
220323101	0	0	0	0	0	0
220323101	0	2	0	0	0	0
220323101	1	1	0	0	0	0
220323101	0	1	0	0	1	0
220328101	0	0	0	0	0	0
220328101	1	0	1	1	0	0
220328101	0	0	0	0	0	0
220328101	0	0	1	1	0	0
220328101	0	3	0	0	0	0
220328101	0	0	0	0	0	0
220330101	0	0	0	0	0	0
220330101	1	0	0	1	0	0
220330101	0	0	0	0	0	0
220330101	0	0	0	0	0	0
220330101	0	0	0	0	1	0
220330101	0	0	0	0	0	0
220330102	0	0	0	0	0	0
220330102	3	1	0	2	3	0
220330102	2	1	2	3	2	1
220330102	2	0	3	1	3	0
220330102	1	0	0	0	3	0
220330102	1	2	0	1	3	1
220352104	1	2	2	1	2	1
220352104	1	0	3	0	3	2
220352104	1	1	1	0	2	1
220352104	2	1	0	1	1	0
220352104	0	0	0	0	0	0
220352104	1	1	0	0	3	0
230034101	0	0	0	0	0	0
230034101	0	0	0	0	0	0
230034101	0	0	0	0	0	0
230034101	2	0	0	0	0	0
230034101	1	1	0	0	1	0
230034101	0	0	0	0	1	0
230071101	1	2	1	1	2	2
230071101	2	0	2	0	1	0
230071101	1	1	1	1	1	1
230071101	0	3	0	0	0	0
230071101	0	2	0	0	0	0
230071101	1	0	0	0	1	0
230081101	2	1	0	0	0	0
230081101	2	0	1	1	0	1
230081101	2	1	1	1	0	0
230081101	0	1	1	1	1	0
230081101	1	1	0	1	1	0
230081101	1	1	0	1	1	1
230088101	2	2	2	2	2	3
230088101	2	2	0	0	2	2
230088101	3	1	1	0	0	1
230088101	3	2	2	2	2	2
230088101	0	1	0	0	1	1
230088101	3	3	3	2	3	2
230155101	1	1	0	1	3	2
230155101	1	0	1	1	1	0
230155101	1	1	1	0	0	0
230155101	2	2	0	3	2	0
230155101	0	1	0	1	0	0
230155101	2	3	3	2	0	0
230167101	3	1	1	0	0	0
230167101	0	0	0	0	2	0
230167101	0	0	0	0	0	0
230167101	2	0	0	0	1	0
230167101	0	0	0	0	0	0
230167101	1	2	1	0	1	0
230191101	1	0	0	1	1	1
230191101	0	0	0	1	0	0
230191101	2	0	1	0	1	0
230191101	0	0	1	0	0	0
230191101	0	1	0	0	0	0
230191101	0	1	0	0	1	0
230191102	0	0	0	0	0	0
230191102	0	0	0	0	0	0
230191102	0	0	1	0	0	0
230191102	0	0	0	1	0	0
230191102	0	0	0	0	2	0
230191102	1	0	0	0	0	0
230283101	1	0	1	1	1	1
230283101	0	0	1	0	1	0
230283101	1	0	0	0	0	1
230283101	2	3	0	3	1	0
230283101	1	0	0	0	0	0
230283101	1	2	0	1	1	0
230329101	0	0	0	0	0	0
230329101	0	0	0	0	0	0
230329101	0	0	0	0	0	0
230329101	1	3	0	1	0	0
230329101	0	2	0	0	0	0
230329101	0	2	0	0	3	0
230355102	0	0	0	0	0	0
230355102	0	0	0	0	0	0
230355102	0	0	0	0	0	0
230355102	0	0	0	0	0	0
230355102	0	0	0	0	0	0
230355102	0	0	0	0	0	0
230375103	0	0	0	0	1	0
230375103	0	0	3	0	1	1
230375103	1	0	0	0	0	0
230375103	1	3	0	0	0	0
230375103	0	3	0	0	2	0
230375103	1	1	0	0	0	0
230454101	0	0	1	0	0	0
230454101	0	0	0	0	0	0
230454101	0	0	0	0	0	0
230454101	0	0	0	0	0	0
230454101	0	0	0	0	0	0
230454101	0	0	0	0	0	0
230509103	1	1	0	0	1	0
230509103	0	0	0	0	0	0
230509103	2	2	1	2	2	1
230509103	3	2	2	2	2	1
230509103	1	1	0	0	1	0
230509103	0	3	1	0	0	0
230511101	1	0	0	0	1	0
230511101	1	0	1	3	3	0
230511101	1	1	1	1	1	1
230511101	2	0	0	0	0	0
230511101	0	1	0	0	0	0
230511101	3	2	3	3	3	0
230520102	0	0	1	1	1	1
230520102	0	0	0	0	0	0
230520102	1	0	0	1	1	1
230520102	0	3	0	0	0	0
230520102	0	1	0	0	0	0
230520102	0	2	0	1	0	0
230530101	1	1	1	0	0	0
230530101	0	0	0	0	1	0
230530101	1	1	0	0	0	0
230530101	1	0	2	2	2	0
230530101	1	0	0	1	0	0
230530101	1	0	0	0	0	0
230537102	1	0	1	0	1	0
230537102	0	0	0	0	0	0
230537102	1	0	0	0	1	0
230537102	1	0	0	2	2	1
230537102	0	1	0	1	2	1
230537102	1	1	0	0	1	0
230537103	1	1	1	1	0	1
230537103	0	0	0	2	1	0
230537103	2	0	1	1	0	1
230537103	2	2	1	1	2	1
230537103	2	1	0	0	3	0
230537103	3	3	0	0	1	0
230542101	1	1	0	0	0	1
230542101	0	0	0	0	1	0
230542101	1	1	0	0	0	0
230542101	1	1	0	0	1	0
230542101	0	0	1	0	0	0
230542101	0	1	0	1	0	0
230544101	1	1	0	0	1	1
230544101	0	0	0	0	0	0
230544101	1	0	1	1	1	0
230544101	1	0	0	0	1	0
230544101	0	0	0	0	2	0
230544101	1	1	0	0	1	0
230549103	0	0	0	0	0	0
230549103	0	0	1	0	1	0
230549103	2	2	2	1	1	0
230549103	1	2	0	0	2	0
230549103	0	1	1	0	2	1
230549103	3	3	0	0	3	0
230565101	0	1	0	0	0	0
230565101	0	0	1	0	1	0
230565101	0	0	0	0	0	0
230565101	1	0	0	1	0	0
230565101	0	3	0	1	1	0
230565101	1	1	1	1	0	0
230565105	0	0	0	0	0	0
230565105	0	0	1	0	1	0
230565105	0	1	1	1	0	0
230565105	1	2	1	1	2	0
230565105	0	3	1	0	1	1
230565105	0	2	1	1	1	1
230568101	0	0	0	0	0	0
230568101	0	0	1	1	1	0
230568101	0	0	0	0	0	0
230568101	0	1	0	0	0	0
230568101	1	1	0	0	1	0
230568101	0	0	0	0	0	0
230585102	1	0	0	0	0	0
230585102	0	0	0	0	0	0
230585102	0	0	0	0	0	0
230585102	0	0	0	0	0	0
230585102	0	0	0	0	0	0
230585102	0	0	0	0	0	0
310052101	0	0	0	0	0	0
310052101	0	0	1	0	0	0
310052101	0	0	0	0	0	0
310052101	0	0	0	0	1	0
310052101	0	0	0	0	0	0
310052101	0	0	0	0	1	0
310087101	1	0	0	0	0	0
310087101	0	0	0	1	0	0
310087101	0	0	0	0	0	0
310087101	1	0	1	1	0	0
310087101	1	0	0	0	0	0
310087101	1	0	1	1	0	0
310119101	0	1	1	2	2	2
310119101	3	3	3	1	3	3
310119101	1	0	0	0	1	0
310119101	3	3	1	2	2	0
310119101	3	3	3	3	3	3
310119101	1	3	2	2	1	0
310182102	0	0	0	0	0	0
310182102	0	0	0	0	0	0
310182102	0	0	0	0	0	0
310182102	1	0	0	0	0	0
310182102	0	0	0	0	0	0
310182102	1	0	0	0	0	0
310211101	1	0	0	0	0	0
310211101	0	1	0	0	1	0
310211101	0	0	0	0	0	0
310211101	2	3	1	0	1	0
310211101	0	3	2	0	2	0
310211101	0	3	2	0	2	0
310273101	0	0	0	0	0	0
310273101	0	0	0	1	1	0
310273101	0	0	0	0	0	0
310273101	0	0	0	0	0	0
310273101	0	0	0	0	0	0
310273101	0	0	0	0	0	0
310273102	0	0	0	0	0	0
310273102	0	0	0	1	1	0
310273102	0	0	0	0	0	0
310273102	1	2	0	0	1	0
310273102	0	2	0	0	0	0
310273102	0	1	0	0	0	0
310309101	0	0	0	0	0	0
310309101	0	0	0	0	0	0
310309101	0	0	0	0	0	0
310309101	0	0	0	0	0	0
310309101	0	0	0	0	0	0
310309101	0	0	0	0	0	0
310309102	1	0	1	1	0	1
310309102	0	0	0	0	0	0
310309102	0	0	0	0	0	0
310309102	1	0	1	0	0	0
310309102	0	1	0	0	0	0
310309102	0	1	0	0	0	0
310391102	1	1	1	0	0	0
310391102	0	0	0	0	0	0
310391102	0	2	0	0	0	0
310391102	1	0	1	1	2	1
310391102	3	0	0	3	3	3
310391102	0	0	0	0	2	0
310417101	0	0	0	0	0	0
310417101	0	0	1	0	0	0
310417101	0	0	0	0	0	0
310417101	1	1	1	2	0	0
310417101	0	1	0	1	0	0
310417101	0	1	0	0	0	0
310417102	0	0	0	0	0	0
310417102	3	0	0	1	1	1
310417102	1	0	0	0	0	0
310417102	0	0	0	0	0	0
310417102	0	1	3	1	0	0
310417102	1	0	0	0	2	0
310457101	0	0	0	0	0	0
310457101	0	0	0	0	0	0
310457101	0	0	0	0	0	0
310457101	0	0	0	0	0	0
310457101	0	1	0	0	0	0
310457101	0	0	0	0	2	0
310457102	1	0	0	0	0	0
310457102	0	0	0	0	0	0
310457102	1	1	1	0	0	0
310457102	0	0	0	0	1	0
310457102	1	0	0	0	1	0
310457102	2	2	0	0	3	0
310480101	0	0	0	0	0	0
[truncated: 4,331 more rows]

## Sheet: social capital
id	var1	var2	var3	var4	var5	var6	var7	var8	var9
110020101	0	1	1	4	0	0	4	3	3
110020101	0	1	4	5	4	4	3	3	3
110020101	0	2	4	5	4	4	3	3	3
110020101	0	1	4	5	4	5	4	3	4
110020101	0	2	4	3	4	4	4	4	5
110020101	0	2	4	3	4	4	4	3	3
110026104	0	2	0	4	4	4	3	3	3
110026104	0	1	4	3	4	3	2	3	2
110026104	0	2	4	3	4	3	2	2	4
110026104	0	2	4	5	2	3	2	3	3
110026104	0	2	4	5	2	4	3	3	5
110026104	0	1	4	5	3	2	3	3	5
110060101	0	2	3	4	4	3	2	4	3
110060101	0	1	4	3	3	3	3	4	3
110060101	0	2	4	3	2	3	3	5	4
110060101	0	2	4	5	2	3	2	3	3
110060101	0	2	1	5	3	3	2	3	3
110060101	0	1	4	3	2	3	3	4	3
110060102	0	2	1	4	0	0	2	1	3
110060102	1	1	4	5	3	3	2	2	2
110060102	1	2	4	5	4	3	3	5	4
110060102	1	2	4	5	3	3	2	3	3
110060102	0	2	4	5	4	3	2	2	2
110060102	0	2	4	3	3	3	3	2	2
110074102	0	2	1	4	0	0	2	1	3
110074102	0	1	4	5	4	4	3	2	3
110074102	0	2	1	5	3	4	2	4	3
110074102	0	2	1	5	4	4	2	2	4
110074102	0	2	1	5	4	4	3	2	4
110074102	0	2	1	3	4	3	2	4	3
110078103	0	2	1	4	0	0	4	3	5
110078103	0	0	4	5	4	4	2	5	5
110078103	0	2	4	5	2	3	2	4	4
110078103	0	2	4	5	4	4	2	5	5
110078103	0	2	4	5	4	4	3	4	4
110078103	0	2	4	3	4	3	4	4	4
110119101	0	2	3	3	2	2	4	5	4
110119101	0	0	3	5	3	4	3	4	2
110119101	0	2	1	5	3	5	3	4	4
110119101	0	0	3	3	3	3	3	4	4
110119101	0	2	3	5	4	4	4	5	5
110119101	0	1	2	5	3	3	4	4	4
110123102	0	2	1	4	0	0	3	3	3
110123102	0	1	4	5	4	5	3	3	3
110123102	0	2	4	5	3	5	4	5	5
110123102	0	1	4	5	4	5	3	5	5
110123102	0	2	4	5	5	5	4	5	5
110123102	0	2	4	4	4	5	4	5	5
120004101	0	2	1	4	0	0	3	4	3
120004101	0	1	4	4	4	4	2	4	3
120004101	0	2	4	5	3	2	3	3	3
120004101	0	1	4	5	3	3	3	5	4
120004101	0	2	4	4	4	4	3	4	4
120004101	0	2	1	3	4	4	3	4	4
120004102	0	1	1	4	0	0	3	4	3
120004102	0	1	4	3	2	2	3	4	4
120004102	0	2	4	5	3	3	2	5	4
120004102	0	1	4	5	3	3	3	4	4
120004102	0	2	4	4	4	4	3	4	4
120004102	0	1	4	4	4	4	2	4	4
120024103	0	2	1	2	0	0	3	4	4
120024103	0	2	4	5	4	4	2	4	4
120024103	0	2	4	5	3	3	2	5	4
120024103	0	1	4	5	4	3	3	4	4
120024103	0	2	4	5	4	3	3	4	4
120024103	0	2	4	5	4	5	4	4	4
120094101	1	2	2	4	5	5	3	3	5
120094101	1	1	4	5	3	3	2	5	5
120094101	0	2	4	4	4	3	2	5	5
120094101	0	1	4	5	3	3	2	5	4
120094101	0	2	4	5	4	4	2	5	5
120094101	0	1	4	5	3	3	2	5	5
130005101	0	2	1	4	0	0	3	5	3
130005101	0	2	4	5	4	3	2	5	3
130005101	1	2	4	5	5	4	2	4	5
130005101	1	2	4	3	4	3	2	3	3
130005101	1	2	4	3	2	2	2	4	5
130005101	1	2	4	5	4	3	2	4	4
130103103	0	1	1	4	0	0	3	4	5
130103103	0	2	4	3	4	4	2	4	3
130103103	0	2	4	3	3	3	3	4	4
130103103	0	2	4	3	3	3	3	3	3
130103103	1	2	4	3	4	5	3	3	3
130103103	1	2	4	3	3	4	2	3	3
130106102	0	1	1	4	0	0	2	4	4
130106102	0	2	4	3	3	3	2	3	3
130106102	0	2	4	5	5	5	0	5	4
130106102	0	2	4	3	4	4	3	3	2
130106102	1	2	1	3	4	3	3	3	5
130106102	0	2	1	2	4	4	3	4	4
130141102	0	1	1	4	0	0	3	4	4
130141102	1	1	4	5	4	5	3	5	5
130141102	0	2	4	5	3	3	3	5	5
130141102	0	2	4	5	4	4	3	4	1
130141102	0	2	4	5	4	2	3	5	5
130141102	0	2	4	5	4	4	3	5	5
130154101	0	1	1	4	0	0	0	5	5
130154101	0	2	4	3	4	5	4	5	5
130154101	1	2	4	3	4	4	2	5	5
130154101	1	2	4	3	3	5	3	5	5
130154101	1	2	4	3	5	5	3	5	5
130154101	1	1	1	2	5	5	2	5	5
130166101	0	1	2	4	4	5	4	1	2
130166101	0	2	4	4	4	3	3	1	3
130166101	0	2	4	5	3	3	2	1	4
130166101	0	2	4	5	3	3	0	3	3
130166101	0	1	3	5	4	3	0	1	1
130166101	0	1	4	5	4	3	0	1	3
130166102	0	1	2	4	5	4	4	4	5
130166102	0	2	4	3	4	3	3	1	4
130166102	0	2	4	5	4	3	3	3	5
130166102	0	2	4	3	5	4	3	4	5
130166102	0	0	4	5	5	5	4	5	5
130166102	0	1	3	5	5	5	3	5	5
130179101	0	1	2	4	3	3	0	3	3
130179101	0	1	4	5	3	5	3	2	3
130179101	0	2	4	5	4	4	3	4	4
130179101	0	1	4	5	4	5	3	4	4
130179101	0	2	4	5	4	4	3	4	5
130179101	0	1	4	5	4	5	3	4	3
130199101	0	1	1	4	0	0	3	5	3
130199101	0	0	4	3	4	3	3	4	3
130199101	1	2	4	4	4	3	2	5	4
130199101	0	2	4	4	4	3	3	3	4
130199101	0	2	4	5	4	4	3	4	4
130199101	0	2	1	5	4	3	2	4	4
130227101	0	1	3	4	4	5	4	5	5
130227101	0	1	4	5	4	4	3	3	4
130227101	1	2	4	3	5	5	4	5	5
130227101	0	2	4	5	4	4	3	5	5
130227101	1	2	4	5	4	5	3	3	4
130227101	1	1	4	5	4	4	4	3	3
130299106	0	1	2	4	4	4	3	2	2
130299106	1	2	4	3	4	3	2	3	3
130299106	1	2	4	3	3	3	2	2	3
130299106	1	2	4	5	4	4	2	3	2
130299106	0	2	1	5	3	3	2	4	4
130299106	0	2	1	2	4	3	2	3	3
130311101	1	1	1	4	0	0	2	3	3
130311101	0	2	4	2	4	4	3	3	3
130311101	1	2	4	5	4	3	2	5	5
130311101	0	2	4	5	4	3	2	3	3
130311101	1	2	4	2	5	3	2	5	5
130311101	0	2	4	2	4	5	3	4	5
130311102	1	1	2	4	4	3	3	4	4
130311102	1	1	4	2	4	3	3	4	4
130311102	1	2	4	3	4	3	2	4	4
130311102	0	2	4	3	2	3	2	4	4
130311102	0	2	4	2	5	4	2	5	5
130311102	0	1	4	2	4	4	3	4	4
130318101	1	1	2	4	4	3	3	3	3
130318101	1	2	4	2	4	5	3	5	3
130318101	1	2	4	3	4	3	2	5	5
130318101	1	1	4	5	5	5	2	5	5
130318101	1	1	4	5	4	3	2	4	4
130318101	1	2	4	5	2	4	2	4	5
130318102	0	2	2	4	4	4	3	3	3
130318102	1	1	4	3	2	3	3	4	3
130318102	1	2	4	5	4	5	2	5	4
130318102	1	1	4	5	5	5	3	5	5
130318102	1	2	4	3	2	2	3	4	4
130318102	1	2	4	5	4	5	2	5	5
130330101	0	1	2	4	2	3	2	2	3
130330101	1	2	4	3	4	3	3	3	3
130330101	1	2	4	5	4	3	2	5	4
130330101	1	2	4	3	4	1	3	4	5
130330101	0	2	4	3	3	2	3	5	5
130330101	0	2	4	5	4	2	2	4	4
130330102	1	1	2	4	4	2	0	5	4
130330102	1	2	4	3	4	3	0	2	3
130330102	1	2	1	3	4	2		5	5
130330102	1	2	4	3	4	3	3	3	3
130330102	0	2	4	3	3	2	3	5	5
130330102	0	2	4	5	4	4	3	5	5
130336101	1	1	2	4	4	3	3	2	4
130336101	1	2	4	5	2	4	4	5	5
130336101	1	2	4	3	4	3	2	5	5
130336101	1	2	4	2	4	4	3	5	5
130336101	0	2	4	5	4	4	3	4	5
130336101	0	2	4	5	4	5	4	5	5
130368101	1	1	1	1	0	0	2	5	4
130368101	0	1	4	3	3	3	2	5	4
130368101	0	2	1	5	3	4	3	5	5
130368101	0	1	1	5	4	3	3	5	5
130368101	0	1	1	3	4	4	3	5	5
130368101	0	2	1	3	4	3	3	5	5
130368102	0	1	1	4	0	0	3	5	5
130368102	0	2	4	5	3	3	1	5	4
130368102	0	2	1	5	3	3	2	5	4
130368102	0	1	4	5	3	3	3	5	5
130368102	0	2	1	5	4	4	3	5	5
130368102	0	2	1	5	4	3	3	5	5
130370101	0	1	2	4	4	3	2	4	4
130370101	0	1	4	2	4	4	3	5	3
130370101	0	2	1	5	3	3	2	5	4
130370101	0	1	4	5	2	3	2	4	4
130370101	0	2	1	4	4	4	3	4	5
130370101	0	1	1	5	3	3	3	4	5
130398101	0	1	3	4	5	3	2	5	5
130398101	0	2	4	3	4	3	2	5	4
130398101	1	2	4	3	4	3	0	3	5
130398101	1	2	4	3	5	5	0	4	5
130398101	1	2	4	3	4	4	2	5	5
130398101	1	2	1	2	5	5	2	5	5
130424101	1	1	3	4	4	3	2	4	3
130424101	1	2	4	3	4	3	2	4	4
130424101	1	2	4	3	3	3	3	4	4
130424101	1	2	4	3	3	3	3	5	5
130424101	0	2	4	5	4	3	3	5	5
130424101	1	1	1	3	3	3	2	3	4
130424102	1	1	3	4	4	3	3	5	4
130424102	1	2	4	3	4	4	3	5	5
130424102	1	2	4	3	3	3	3	4	4
130424102	1	2	4	3	4	4	3	4	4
130424102	1	2	1	3	2	4	3	5	5
130424102	1	1	1	3	3	3	3	5	5
130425101	1	1	3	4	4	3	3	3	3
130425101	1	2	2	3	4	4	4	2	3
130425101	1	2	4	5	4	5	3	3	4
130425101	0	2	4	5	4	4	3	5	5
130425101	0	2	4	3	4	4	4	5	5
130425101	0	2	4	2	4	5	4	5	5
130425102	0	1	3	4	4	4	3	3	3
130425102	0	2	4	3	4	4	3	2	4
130425102	0	2	4	2	4	4	3	3	4
130425102	0	2	4	5	4	4	3	3	5
130425102	0	2	4	5	4	4	3	5	5
130425102	0	2	1	2	4	4	3	5	5
130433101	0	1	1	4	0	0	3	5	5
130433101	1	2	4	3	4	4	3	2	3
130433101	1	2	4	2	4	3	3	3	3
130433101	1	2	1	2	4	4	3	4	4
130433101	1	1	1	3	4	4	3	4	5
130433101	1	1	4	2	4	4	3	5	5
130435101	0	1	3	4	5	4	3	5	5
130435101	1	2	4	2	4	4	4	5	5
130435101	1	2	4	3	4	3	3	5	5
130435101	1	2	4	2	4	5	3	5	5
130435101	0	2	4	3	4	4	3	5	5
130435101	1	2	4	2	5	5	4	5	5
130437101	0	1	1	4	0	0	3	1	1
130437101	0	2	4	3	4	3	3	3	4
130437101	1	2	4	5	4	4	3	4	4
130437101	1	2	1	5	4	3	3	3	4
130437101	0	2	4	3	4	3	3	4	4
130437101	0	2	4	5	4	4	3	4	4
130437102	0	1	1	4	0	0	3	4	4
130437102	1	2	4	3	4	4	3	3	3
130437102	1	2	4	5	3	4	3	3	4
130437102	1	2	4	2	3	3	3	3	4
130437102	0	2	4	5	4	4	3	4	4
130437102	0	2	4	5	4	4	2	4	4
130438102	0	1	3	4	4	3	3	3	3
130438102	1	0	4	3	4	4	3	3	3
130438102	1	2	4	3	3	3	3	5	3
130438102	1	1	4	2	4	5	3	4	4
130438102	1	1	4	2	4	4	3	4	4
130438102	1	1	4	2	4	4	3	4	4
130471102	0	1	1	4	0	0	3	4	4
130471102	0	1	2	5	4	3	2	5	5
130471102	0	2	1	2	3	4	4	5	5
130471102	1	1	1	2	4	4	3	5	5
130471102	0	1	1	5	5	4	3	5	5
130471102	0	0	4	5	5	3	3	5	5
130504101	0	2	2	3	3	3	2	1	1
130504101	0	1	3	2	3	3	2	2	3
130504101	0	2	1	3	3	3		3	2
130504101	0	2	4	5	3	3	2	4	3
130504101	0	2	4	5	2	3	2	3	5
130504101	0	2	4	2	4	3	2	5	5
130505102	0	1	1	4	0	0	2	2	5
130505102	0	2	4	2	3	3	3	3	4
130505102	1	2	1	3	3	3	2	5	5
130505102	1	2	4	5	4	4	4	5	5
130505102	1	2	1	3	5	5	1	4	5
130505102	1	2	4	2	4	4	0	2	3
130568102	1	1	2	4	5	4	4	3	3
130568102	1	2	4	3	4	3	3	3	3
130568102	1	2	4	3	3	3	2	5	4
130568102	1	2	4	5	4	5	4	5	5
130568102	1	2	4	3	4	3	4	5	5
130568102	1	2	4	5	5	4	2	5	5
130568103	1	1	2	4	4	4	4	4	3
130568103	1	2	4	2	4	3	3	3	3
130568103	1	2	4	3	4	3	2	3	3
130568103	0	2	4	2	4	5	4	5	5
130568103	1	2	4	3	4	4	2	5	5
130568103	1	2	4	2	4	4	3	5	5
130572101	1	1	2	1	4	3	3	2	2
130572101	0	2	2	3	4	3	3	3	3
130572101	0	2	2	3	4	3	3	4	4
130572101	0	1	1	2	4	4	3	5	4
130572101	0	2	2	3	4	4	2	3	5
130572101	0	2	1	2	4	4	3	4	4
130588101	1	1	1	4	0	0	3	5	5
130588101	1	1	4	3	2	2	4	4	4
130588101	1	2	4	3	4	2	3	2	4
130588101	1	2	1	3	4	2	3	4	4
130588101	1	2	4	3	4	5	3	5	5
130588101	1	1	4	4	5	5	4	5	5
130591101	1	1	0	4	2	3	0	2	3
130591101	1	1	4	3	4	3	3	1	4
130591101	0	2	4	3	4	2	3	5	5
130591101	0	2	4	3	4	2	3	3	5
130591101	0	1	4	2	4	4	3	3	5
130591101	0	2	4	5	3	5	4	4	4
130593102	0	1	3	4	4	4	3	4	5
130593102	0	1	2	3	4	4	3	3	3
130593102	0	2	1	3	2	3	0	3	4
130593102	0	2	4	3	4	3	0	3	4
130593102	0	2	4	3	4	4	3	3	5
130593102	0	0	4	5	5	5	3	5	4
130596101	1	1	1	4	0	0	3	5	5
130596101	1	2	4	3	4	4	2	3	4
130596101	1	2	4	3	3	3	3	4	5
130596101	1	2	4	3	4	4	2	4	5
130596101	1	2	4	3	4	2	2	5	4
130596101	0	2	4	5	4	4	2	5	5
130598101	1	1	1	4	0	0	0	2	3
130598101	1	1	4	3	4	3	3	3	3
130598101	1	2	4	3	4	3	0	4	3
130598101	0	2	4	3	2	3	3	1	3
130598101	0	2	4	5	2	2	3	3	2
130598101	0	2	4	3	4	4	2	4	4
130599102	1	1	1	4	0	0	3	0	4
130599102	1	1	4	3	4	3	2	4	4
130599102	1	2	4	3	4	4	0	5	4
130599102	1	2	1	3	4	4	2	4	4
130599102	1	2	4	2	2	2	2	5	5
130599102	1	2	4	5	2	2	2	5	5
130600101	0	1	3	4	3	3	1	3	3
130600101	1	0	4	3	3	3	2	3	3
130600101	1	2	4	3	3	2	3	3	3
130600101	1	1	4	5	4	4	3	3	3
130600101	1	2	4	2	2	2	3	4	4
130600101	1	1	1	5	2	3	3	4	4
130613101	0	1	3	3	4	3	3	3	5
130613101	0	2	2	3	3	3	3	2	3
130613101	0	2	2	2	4	3	3	5	5
130613101	0	2	1	5	5	5	4	5	5
130613101	0	0	1	5	5	5	4	5	5
130613101	0	1	3	3	5	5	4	5	5
130643101	1	1	1	4	0	0	2	2	3
130643101	1	1	4	3	5	3	2	4	4
130643101	1	2	4	3	4	5	3	5	5
130643101	1	1	4	3	4	4	3	5	5
130643101	1	2	4	3	4	3	3	5	5
130643101	1	2	4	3	3	3	3	4	3
130643102	0	1	1	4	0	0	3	4	3
130643102	1	2	4	3	3	3	3	3	4
130643102	1	2	4	3	4	3	2	5	5
130643102	1	2	4	3	4	3	3	5	5
130643102	1	2	4	2	4	3	2	5	4
130643102	1	2	4	2	4	5	3	5	4
130649102	0	1	1	4	0	0	2	4	4
130649102	1	2	4	3	4	3	3	5	5
130649102	0	2	4	3	4	3	2	3	4
130649102	0	2	4	4	4	3	2	3	4
130649102	0	2	4	3	4	3	2	5	5
130649102	0	2	4	5	4	4	3	5	5
130654102	1	1	1	4	0	0	3	3	5
130654102	1	2	4	5	4	5	2	3	4
130654102	1	2	4	3	4	4	2	3	5
130654102	1	2	4	3	4	4	2	5	4
130654102	1	2	4	3	4	4	3	5	5
130654102	1	2	4	3	5	5	2	4	5
130659102	1	1	1	4	0	0	3	5	5
130659102	1	2	4	3	4	5	3	5	5
130659102	1	2	4	3	4	4	2	5	5
130659102	1	2	4	3	4	3	3	5	5
130659102	1	2	1	3	5	5	4	5	5
130659102	1	1	1	3	4	4	2	5	4
130677101	1	1	0	4	4	5	0	4	4
130677101	1	1	4	5	4	5	4	3	3
130677101	1	2	4	3	4	3	2	5	5
130677101	1	1	4	5	5	4	2	5	5
130677101	0	1	4	5	4	4	0	5	5
130677101	0	2	4	5	4	5	3	4	4
130677102	1	1	1	4	0	0	0	4	3
130677102	1	1	4	5	4	3	3	3	4
130677102	1	2	4	5	4	5	3	4	5
130677102	1	2	4	5	4	4	3	4	4
130677102	1	2	4	5	4	4	3	3	4
130677102	1	2	4	5	4	4	3	3	4
130686101	0	1	1	4	0	0	3	3	4
130686101	1	1	4	3	4	3	3	1	3
130686101	1	2	4	3	4	4	3	5	3
130686101	1	0	4	3	4	3	3	1	1
130686101	0	2	1	4	3	3	2	3	3
130686101	0	2	4	2	5	4	3	4	1
130688101	0	1	1	1	0	0	2	3	2
130688101	0	1	2	4	4	3	2	3	4
130688101	0	2	2	5	4	4	3	4	4
130688101	1	2	1	2	4	4	2	4	3
130688101	0	2	1	3	4	4	3	1	3
130688101	0	2	1	2	4	5	4	5	5
130689101	1	1	3	4	4	3	3	5	5
130689101	1	1	4	2	3	4	3	4	4
130689101	1	2	1	3	3	3	3	5	4
130689101	1	1	4	3	3	3	3	4	3
130689101	1	1	4	3	3	4	3	4	4
130689101	1	2	4	3	3	3	3	4	4
130713101	0	1	3	4	4	4	2	4	4
130713101	1	1	4	2	2	3	1	2	3
130713101	1	2	4	2	4	3	2	4	4
130713101	0	2	1	3	4	3	2	4	5
130713101	1	2	1	2	3	3	3	3	3
130713101	1	0	1	2	4	4	2	4	3
130723101	1	1	1	4	0	0	2	1	4
130723101	1	1	4	3	4	3	2	4	3
130723101	1	2	4	2	3	3	2	4	4
130723101	1	2	4	5	4	3	2	4	4
130723101	1	2	1	2	4	3	3	4	5
130723101	0	2	4	5	3	3	2	4	4
130746103	0	2	1	4	0	0	2	4	4
130746103	0	1	4	5	4	4	2	5	3
130746103	0	2	4	5	4	5	3	5	5
130746103	0	1	4	5	4	4	3	5	4
130746103	0	0	4	5	4	4	2	5	4
130746103	0	0	4	4	5	5	3	4	4
130795101	0	1	1	4	0	0	2	3	4
130795101	1	1	4	3	3	4	2	3	3
130795101	1	2	4	3	4	4	4	3	3
130795101	1	2	4	3	3	3	2	4	4
130795101	1	2	4	3	4	4	3	5	4
130795101	1	2	1	3	4	4	2	4	4
130802102	0	1	1	4	0	0	4	3	5
130802102	1	0	4	3	5	5	3	3	3
130802102	0	2	4	3	3	3	4	2	2
130802102	0	2	4	3	3	3	3	1	3
130802102	0	2	4	3	4	4	2	5	5
130802102	0	2	4	3	5	5	3	4	5
130804101	0	1	1	1	0	0	4	3	5
130804101	0	1	4	3	4	3	1	4	5
130804101	0	2	4	2	3	3	2	3	3
130804101	0	2	4	3	4	3	3	3	3
130804101	0	2	4	3	5	5	3	5	5
130804101	0	2	4	3	4	4	4	5	5
130810101	0	1	2	4	3	3	2	3	5
130810101	1	1	4	3	3	3	2	1	2
130810101	1	2	4	3	2	3	2	3	3
130810101	1	2	4	3	3	3	2	3	3
130810101	1	2	4	3	2	2	2	2	2
130810101	0	2	4	3	5	5	4	3	3
130810102	0	1	1	4	0	0	2	3	3
130810102	1	1	4	3	4	3	3	2	3
130810102	1	2	4	3	4	3	3	2	2
130810102	1	2	4	3	4	3	2	3	3
130810102	0	1	4	3	5	5	3	2	2
130810102	1	2	1	4	2	2	2	1	1
130818101	0	1	2	4	4	4	2	3	3
130818101	0	0	4	2	4	4	4	3	2
130818101	0	2	1	3	4	5	3	5	4
130818101	0	2	4	3	4	3	3	5	5
130818101	0	2	4	3	4	5	4	5	5
130818101	0	2	4	3	5	4	3	5	5
130824101	0	1	1	4	0	0	3	5	5
130824101	0	0	4	3	3	3	3	4	3
130824101	1	2	4	5	3	3	3	5	5
130824101	1	1	1	3	4	5	3	4	4
130824101	1	1	1	3	4	4	3	4	3
130824101	1	2	4	3	5	5	3	4	4
130824102	0	1	3	4	4	4	2	3	4
130824102	0	1	4	2	4	4	3	3	3
130824102	0	2	4	2	3	3	3	5	5
130824102	0	0	4	3	4	3	3	3	4
130824102	0	1	1	2	4	4	3	4	4
130824102	0	2	4	3	4	4	3	4	4
130825101	1	1	3	4	3	3	2	5	3
130825101	0	1	4	3	4	3	2	5	3
130825101	1	2	4	3	5	5	2	5	5
130825101	1	2	4	3	4	5	3	5	4
130825101	1	2	4	3	5	5	3	5	5
130825101	1	2	4	3	5	5	4	5	5
130827101	0	1	3	4	5	3	2	5	3
130827101	0	1	4	3	4	3	2	5	4
130827101	0	2	4	3	4	3	2	3	3
130827101	0	1	4	3	4	4	3	5	4
130827101	0	2	4	3	4	4	2	5	5
130827101	0	2	4	3	5	5	4	5	5
130827102	0	1	3	4	4	4	3	5	4
130827102	1	1	4	3	4	3	2	4	4
130827102	1	2	4	3	3	3	2	4	4
130827102	0	1	4	3	4	4	3	5	4
130827102	1	1	4	3	4	4	2	5	4
130827102	0	1	4	5	1	5	3	4	4
130831101	1	1	1	4	0	0	2	4	4
130831101	0	1	4	3	3	3	2	4	4
130831101	1	2	4	5	4	4	2	5	5
130831101	1	2	4	3	4	3	2	4	4
130831101	1	2	1	3	4	4	3	3	3
130831101	1	2	4	3	4	4	3	4	4
130838102	0	1	1	4	0	0	0	3	3
130838102	1	1	4	3	4	3	2	3	2
130838102	0	2	4	3	4	5	2	5	5
130838102	1	2	4	3	4	5	3	1	1
130838102	1	2	4	3	4	4	3	2	3
130838102	1	2	4	3	4	5	3	5	5
130839101	1	1	2	4	5	5	4	5	5
130839101	1	1	4	3	5	5	2	5	5
130839101	1	1	4	2	5	5	4	5	5
130839101	1	2	4	3	4	5	4	5	5
130839101	1	2	4	2	5	5	4	5	5
130839101	0	2	4	5	5	5	4	5	5
130839102	0	1	3	4	5	5	3	4	4
130839102	0	1	4	3	5	5	2	2	3
130839102	0	2	4	2	5	5	4	5	5
130839102	0	2	4	3	4	5	4	5	5
130839102	0	2	4	2	5	5	4	5	5
130839102	0	2	4	3	5	5	4	5	5
130850102	1	1	1	4	0	0	4	4	5
130850102	1	2	4	3	4	5	0	0	3
130850102	1	2	4	3	4	4	3	4	4
130850102	1	2	4	5	4	4	3	4	4
130850102	1	2	1	5	4	4	3	3	5
130850102	1	2	1	5	4	5	0	4	4
130877102	0	1	1	4	0	0	2	2	4
130877102	1	1	4	3	4	3	3	4	4
130877102	1	2	1	3	2	2	3	5	5
130877102	1	2	4	3	2	3	3	4	4
130877102	1	2	4	3	4	5	3	5	5
130877102	1	2	4	2	5	4	3	5	5
130881101	1	1	1	4	0	0	3	5	5
130881101	1	1	4	3	3	3	2	5	4
130881101	1	2	1	2	3	3	3	3	3
130881101	1	2	4	4	4	3	3	3	4
130881101	1	2	1	3	4	4	3	5	4
130881101	0	1	1	3	5	5	3	5	5
130894102	1	1	1	4	0	0	2	3	3
130894102	1	1	4	3	3	3	2	2	3
130894102	1	2	4	3	4	3	2	3	3
130894102	1	0	4	3	4	3	3	5	3
130894102	1	2	4	3	4	3	2	4	4
130894102	1	2	4	2	4	4	2	4	4
130894103	0	1	1	4	0	0	0	4	4
130894103	1	1	4	3	3	3	2	4	3
130894103	1	2	4	3	4	3	2	4	4
130894103	1	2	4	3	4	3	2	5	4
130894103	1	2	4	3	4	5	2	4	4
130894103	1	1	4	2	4	4	2	4	4
130896105	0	1	1	4	0	0	3	3	4
130896105	0	1	4	3	3	3	3	4	4
130896105	0	2	4	3	3	3	3	4	4
130896105	0	2	1	3	4	3	3	4	4
130896105	0	2	4	5	4	3	3	1	5
130896105	0	1	4	3	4	3	3	5	5
130907103	1	1	1	4	0	0	4	5	5
130907103	1	1	4	3	4	4	4	5	3
130907103	0	2	4	3	4	4	3	5	5
130907103	0	2	4	5	4	4	2	5	5
130907103	0	1	1	3	5	4	4	5	5
130907103	0	2	4	3	4	5	2	5	5
130919102	1	1	3	4	3	3	3	4	4
130919102	0	1	4	3	4	5	3	3	3
130919102	0	2	4	3	4	3	3	5	5
130919102	1	2	4	3	4	4	3	5	5
130919102	0	2	1	3	4	4	4	5	5
130919102	1	2	4	3	4	3	3	5	5
130930101	0	1	1	1	0	0	4	5	5
130930101	1	1	4	3	4	4	2	5	1
130930101	0	2	1	2	4	4	3	5	5
130930101	0	1	1	2	4	3	3	5	5
130930101	0	1	1	3	2	3	2	5	5
130930101	0	1	1	3	4	4	2	5	5
140066102	0	1	1	4	0	0	0	3	5
140066102	0	1	4	5	4	4	3	4	4
140066102	1	2	4	3	4	2	2	5	4
140066102	0	2	4	3	2	2	2	5	5
140066102	1	2	4	3	5	4	2	5	5
140066102	1	2	4	3	4	3	1	5	4
140119101	0	1	1	4	0	0	4	5	5
140119101	0	2	4	3	3	3	0	2	4
140119101	0	2	4	2	3	3	2	4	4
140119101	0	2	4	3	4	5	2	5	5
140119101	0	1	4	3	4	4	2	5	5
140119101	0	2	4	5	4	4	2	1	4
140132101	0	1	1	4	0	0	4	5	5
140132101	0	2	4	3	4	4	3	4	4
140132101	1	2	4	2	5	4	3	5	3
140132101	1	2	4	2	4	4	3	4	5
140132101	1	1	4	3	4	4	2	4	5
140132101	0	2	4	3	4	4	4	1	5
140132102	0	1	1	4	0	0	4	5	4
140132102	0	2	4	3	4	4	3	4	5
140132102	1	2	4	2	4	3	3	5	5
140132102	0	2	4	3	4	5	4	5	5
140132102	1	1	4	3	4	4	2	4	3
140132102	0	2	4	3	4	5	3	5	5
140146102	1	2	1	4	0	0	3	5	5
140146102	1	2	2	2	3	3	3	5	5
140146102	1	2	1	5	4	3	2	5	5
140146102	0	2	4	3	4	3	3	5	5
140146102	1	2	4	3	4	4	3	5	5
140146102	1	2	1	3	4	4	3	5	5
140148102	1	1	3	4	2	1	2	5	4
140148102	1	2	4	2	4	3	3	3	3
140148102	0	2	4	5	2	2	3	4	4
140148102	1	2	1	3	4	4	3	3	3
140148102	1	2	1	3	4	4	3	3	3
140148102	1	2	1	2	4	4	3	5	5
140149101	1	2	1	4	0	0	3	5	4
140149101	1	2	4	3	3	2	3	5	5
140149101	1	2	1	3	2	2	3	4	5
140149101	1	2	4	3	4	4	3	4	4
140149101	1	2	1	3	2	2	2	5	5
140149101	1	2	4	3	4	5	4	5	5
140159102	1	2	1	4	0	0	3	5	5
140159102	1	2	4	4	4	3	3	5	5
140159102	0	2	4	5	3	3	3	3	3
140159102	1	2	4	5	4	4	3	5	5
140159102	1	2	4	5	4	4	3	4	4
140159102	0	2	4	5	4	4	3	5	5
140194102	1	2	1	4	0	0	2	3	4
140194102	1	2	4	3	2	2	3	3	3
140194102	0	2	4	3	4	4	3	3	3
140194102	0	2	4	3	4	4	2	4	3
140194102	0	2	4	3	4	3	2	3	3
140194102	0	2	4	3	4	4	2	3	4
140201102	0	1	1	4	0	0	2	5	2
140201102	0	2	4	3	3	3	2	3	3
140201102	0	1	4	5	4	4	3	3	4
140201102	1	2	1	5	1	2	3	5	3
140201102	1	2	4	2	4	4	2	5	5
140201102	1	2	4	3	4	4	3	5	5
140214101	0	1	1	4	0	0	4	3	3
140214101	0	2	4	3	3	3	2	3	3
140214101	0	1	4	5	3	2	2	3	4
140214101	0	2	4	5	4	4	2	3	5
140214101	0	2	4	3	1	1	0	3	4
140214101	0	2	4	5	2	3	2	1	3
140219101	0	2	4	4	3	3	3	1	4
140219101	0	1	4	5	3	3	3	3	3
140219101	0	0	4	5	4	4	2	1	5
140219101	0	1	4	5	4	3	2	5	5
140219101	0	1	4	5	4	4	3	5	5
140219101	0	2	4	5	4	3	3	3	5
140224101	0	1	1	1	0	0	3	1	2
140224101	1	1	2	3	4	4	4	4	4
140224101	1	1	4	4	4	4	2	5	3
140224101	1	2	1	3	3	4	2	5	5
140224101	1	2	4	3	4	4	2	2	5
140224101	0	2	1	3	4	4	3	4	2
140227101	0	1	1	4	0	0	3	1	4
140227101	0	1	4	5	3	4	3	3	4
140227101	0	1	4	4	4	4	3	5	5
140227101	0	2	4	2	5	3	2	3	3
140227101	0	1	4	5	4	3	2	3	3
140227101	0	1	4	5	4	3	3	4	4
140245101	0	2	1	4	0	0	2	1	3
140245101	1	2	2	2	4	2	0	3	3
140245101	1	1	1	5	3	3	1	1	5
140245101	1	2	1	3	3	3	2	3	3
140245101	0	1	1	2	4	3	0	2	2
140245101	1	0	4	4	3	3	2	2	5
140363101	1	2	1	4	0	0	3	4	3
140363101	1	2	4	5	4	5	3	3	3
140363101	0	2	4	5	4	4	3	5	4
140363101	0	2	4	3	4	4	3	4	4
140363101	0	2	4	5	4	4	3	4	3
140363101	0	2	4	5	4	5	1	5	5
140372101	0	2	1	4	0	0	3	2	5
140372101	0	1	4	4	4	4	2	5	5
140372101	0	2	4	3	3	3	2	5	5
140372101	0	1	4	3	3	0	2	3	5
140372101	1	1	4	3	4	2	3	5	5
140372101	1	1	4	2	5	3	2	4	5
140486104	0	2	1	4	0	0	2	3	3
140486104	0	1	4	5	3	3	3	3	3
140486104	0	2	4	5	4	4	3	2	2
140486104	0	1	4	5	4	4	2	5	5
140486104	0	2	1	5	4	4	3	5	5
140486104	0	2	4	4	4	5	4	5	5
140487101	0	1	2	4	4	4	3	5	5
140487101	0	1	4	5	3	3	3	3	3
140487101	0	2	4	3	3	3	3	4	5
140487101	0	1	4	5	5	5	3	5	4
140487101	0	2	4	2	4	5	2	5	5
140487101	0	1	4	5	4	5	2	5	5
140487102	0	2	0	4	5	3	3	3	4
140487102	0	1	4	5	3	3	3	3	3
140487102	0	2	4	3	3	3	2	4	4
140487102	0	1	4	5	5	5	4	4	4
140487102	0	2	4	5	5	5	2	4	4
140487102	0	2	4	5	4	4	4	5	5
140496101	0	1	1	4	0	0	3	4	4
140496101	0	1	4	5	3	3	3	3	3
140496101	0	2	4	5	3	3	2	4	4
140496101	0	1	4	3	4	3	3	5	5
140496101	0	2	1	2	4	4	2	5	5
140496101	0	2	1	5	5	5	3	5	5
140513102	0	1	1	4	0	0	2	4	5
140513102	1	0	4	5	4	3	3	3	5
140513102	0	2	4	3	3	2	0	5	5
140513102	0	2	4	5	5	5	2	5	5
140513102	1	1	4	5	3	3	2	3	5
140513102	1	1	4	5	4	4	4	5	5
140523101	0	1	1	4	0	0	2	3	4
140523101	0	2	4	5	3	3	2	5	3
140523101	0	2	4	5	4	4	3	3	3
140523101	0	2	4	5	4	4	3	3	2
140523101	0	1	4	5	4	3	3	4	5
140523101	1	2	4	5	4	4	4	5	5
140569102	0	1	1	4	0	0	2	3	3
140569102	0	2	2	5	4	4	2	1	3
140569102	0	1	4	5	4	4	2	5	5
140569102	0	2	4	4	4	4	2	4	3
140569102	1	2	4	5	4	4	2	5	5
140569102	1	1	4	5	4	3	2	4	3
140571102	0	1	1	4	0	0	2	3	3
140571102	1	2	4	5	4	4	2	2	3
140571102	0	1	4	2	4	4	2	5	5
140571102	0	2	1	3	4	4	2	4	5
140571102	0	1	4	4	4	4	2	5	5
140571102	0	2	4	5	2	2	2	4	4
140581101	0	1	1	4	0	0	2	3	4
140581101	0	2	2	5	4	4	0	3	3
140581101	0	1	4	5	4	4	2	1	5
140581101	0	2	4	3	5	4	2	5	5
140581101	1	2	1	5	4	5	2	3	3
140581101	1	2	4	5	5	5	4	5	3
140582101	0	1	1	4	0	0	2	3	4
140582101	0	2	2	3	4	3	2	4	4
140582101	0	1	4	3	4	2	3	3	4
140582101	0	2	1	4	3	4	2	3	3
140582101	0	1	1	5	3	5	2	3	0
140582101	0	1	1	2	4	4	3	3	3
140590101	0	2	1	4	0	0	4	1	3
140590101	1	2	4	5	4	4	2	2	4
140590101	1	2	4	5	4	3	2	3	3
140590101	1	2	4	5	3	3	2	4	4
140590101	1	2	4	4	4	5	3	4	4
140590101	1	2	1	5	4	3	2	3	4
140590102	0	2	1	4	0	0	4	1	4
140590102	1	2	2	3	4	4	2	3	3
140590102	1	2	4	5	3	3	2	3	4
140590102	0	2	1	5	4	3	3	4	4
140590102	1	2	4	5	4	4	3	5	4
140590102	1	2	4	5	4	4	3	5	5
140591101	0	2	1	4	0	0	4	1	3
140591101	0	2	4	3	3	2	2	2	1
140591101	1	2	4	3	3	3	2	3	3
140591101	1	1	4	3	3	3	3	5	5
140591101	1	2	4	5	4	4	2	5	4
140591101	1	2	4	5	4	4	2	2	5
140603101	0	1	1	4	0	0	4	3	4
140603101	0	0	4	2	3	3	2	3	3
140603101	0	2	4	4	3	3	2	4	4
140603101	0	0	4	4	3	2	3	4	4
140603101	0	1	4	5	4	3	2	5	5
140603101	0	1	4	3	3	3	2	5	5
140614102	0	1	1	4	0	0	3	5	5
140614102	0	2	4	2	4	3	3	3	5
140614102	0	2	4	2	3	3	2	3	5
140614102	0	2	4	5	4	4	2	5	5
140614102	0	2	4	5	4	4	2	4	5
140614102	0	0	4	5	4	4	3	3	5
140625101	1	1	1	4	0	0	0	2	3
140625101	1	1	4	3	3	3	4	3	3
140625101	1	2	4	3	3	3	1	3	3
140625101	1	1	4	3	4	4	3	3	3
140625101	1	2	4	3	4	4	3	5	5
140625101	1	2	4	3	4	3	3	5	4
140628101	1	1	1	4	0	0	2	5	4
140628101	1	2	4	3	4	4	2	5	5
140628101	1	2	4	3	4	3	3	4	3
140628101	1	2	4	3	4	4	3	5	4
140628101	1	2	4	3	4	4	3	4	4
140628101	1	2	1	3	2	4	3	5	5
140636101	0	2	3	1	4	4	0	3	4
140636101	0	1	2	3	4	4	1	2	3
140636101	0	2	4	3	4	3	2	3	3
140636101	0	2	1	3	4	4	3	2	5
140636101	0	2	1	3	4	4	3	5	5
140636101	0	2	1	3	4	4	3	5	5
140663101	1	1	1	4	0	0	2	2	3
140663101	1	2	4	3	4	4	2	3	2
140663101	1	2	4	3	4	4	3	5	5
140663101	1	2	4	2	5	5	3	5	5
140663101	1	2	4	5	5	5	4	5	5
140663101	1	2	4	5	3	3	2	3	5
140721101	0	1	1	4	0	0	4	3	3
140721101	1	2	4	3	4	4	3	4	4
140721101	0	2	4	3	4	3	2	5	3
140721101	1	2	4	5	2	3	2	1	1
140721101	1	2	4	5	4	3	2	5	5
140721101	0	1	4	3	4	2	4	5	5
140721102	0	1	1	4	0	0	2	3	3
140721102	0	2	4	5	4	4	0	3	3
140721102	0	0	4	3	3	3	2	4	5
140721102	0	2	4	5	2	3	2	1	1
140721102	1	2	4	5	4	4	2	2	3
140721102	0	1	4	5	4	4	3	5	5
140733101	0	1	1	4	0	0	3	4	3
140733101	0	2	4	3	4	4	3	4	5
140733101	0	1	1	3	5	5	2	5	5
140733101	0	1	4	4	4	5	3	5	5
140733101	0	2	4	5	4	4	4	3	4
140733101	0	2	4	5	4	4	3	5	5
140733102	0	1	0	4	2	3	3	4	4
140733102	0	2	4	5	4	4	3	5	5
140733102	0	1	4	5	3	4	3	5	5
140733102	0	2	4	5	4	4	4	4	5
140733102	0	2	4	5	5	5	4	5	5
140733102	0	2	4	5	4	4	4	5	5
140794101	1	1	1	4	0	0	2	1	2
140794101	1	2	4	3	4	4	2	3	2
140794101	1	2	1	3	4	4	0	5	5
140794101	1	2	4	3	4	4	3	5	4
140794101	1	2	4	3	4	5	1	5	5
140794101	1	2	1	3	4	4	2	5	5
210097101	1	1	1	4	0	0	2	3	3
210097101	1	2	4	2	3	3	2	3	3
210097101	1	2	4	3	4	3	2	4	3
210097101	1	1	1	3	3	3	3	4	3
210097101	1	2	1	2	4	3	3	4	4
210097101	1	2	4	5	4	4	3	4	4
210098103	1	0	1	4	0	0	4	4	1
210098103	1	2	4	2	4	3	3	3	3
210098103	1	2	4	5	4	3	3	4	5
210098103	1	2	4	3	4	3	4	4	5
210098103	1	2	4	5	4	5	4	5	5
210098103	1	2	1	4	5	5	4	4	5
210103101	0	1	2	4	3	3	2	2	1
210103101	1	2	4	2	3	3	3	3	2
210103101	1	2	4	2	3	3	2	2	2
210103101	1	1	4	5	5	4	3	5	4
210103101	1	1	3	5	3	3	3	5	4
210103101	1	2	4	5	4	5	4	5	5
210104101	1	1	2	4	3	3	0	2	2
210104101	1	2	4	2	3	3	2	3	3
210104101	1	2	4	2	2	3	2	3	2
210104101	1	2	1	2	4	3	2	3	3
210104101	1	2	4	5	4	4	2	5	5
210104101	1	2	4	5	4	4	2	3	4
210116101	1	1	2	4	4	5	2	2	3
210116101	0	2	4	3	3	3	3	3	3
210116101	0	2	4	2	3	3	3	4	4
210116101	1	2	4	3	4	3	3	5	5
210116101	1	2	4	5	5	5	3	3	3
210116101	1	2	4	5	2	2	4	5	4
210146101	1	1	1	4	0	0	2	2	4
210146101	1	2	4	2	4	2	0	4	4
210146101	1	2	4	3	3	3	0	5	5
210146101	1	2	4	5	3	3	2	4	4
210146101	1	2	4	5	4	5	3	5	4
210146101	1	2	4	5	4	3	4	5	5
210146102	1	1	1	4	0	0	2	3	4
210146102	1	2	4	5	4	3	2	4	3
210146102	1	2	4	3	4	4	2	5	5
210146102	1	2	4	2	4	3	3	5	5
210146102	1	2	4	2	4	3	3	4	5
210146102	1	2	4	5	4	5	3	5	5
210149101	0	1	1	4	0	0	3	3	3
210149101	1	2	4	5	3	3	3	4	4
210149101	1	2	1	3	2	1	2	3	3
210149101	1	2	1	3	3	3	3	5	5
210149101	1	1	1	2	4	3	2	5	5
210149101	1	1	4	5	4	5	4	4	5
210166102	0	1	1	4	0	0	2	5	4
210166102	1	1	4	2	4	3	3	5	5
210166102	1	2	4	2	4	3	2	5	4
210166102	1	2	1	2	3	3	3	4	4
210166102	1	2	4	2	4	5	3	5	5
210166102	1	2	4	2	4	5	3	5	5
210261101	0	2	1	4	0	0	3	1	1
210261101	0	1	4	5	4	3	3	3	3
210261101	0	2	4	4	1	2	2	5	5
210261101	0	2	1	5	4	3	3	5	4
210261101	0	1	4	5	2	3	1	5	5
210261101	0	2	4	3	4	3	3	3	4
210269101	0	2	1	4	0	0	4	5	5
210269101	0	1	3	5	4	4	4	1	3
210269101	0	2	4	5	5	5	3	5	5
210269101	0	2	4	5	4	5	3	5	5
210269101	0	1	1	5	4	4	4	5	5
210269101	0	2	4	5	4	5	4	4	5
210271101	0	2	1	4	0	0	3	3	4
210271101	0	1	4	4	3	3	3	3	3
210271101	0	2	4	5	3	3	3	4	4
210271101	0	2	4	5	3	3	2	3	3
210271101	0	2	2	5	4	4	2	4	4
210271101	0	2	4	5	3	3	4	4	4
210313101	0	2	1	4	0	0	3	5	5
210313101	0	1	4	5	4	3	3	4	4
210313101	0	2	4	4	5	3	3	4	5
210313101	0	2	4	5	3	3	3	4	5
210313101	0	2	4	5	4	4	2	5	5
210313101	0	2	1	5	4	3	4	5	5
210317101	0	1	1	4	0	0	3	5	4
210317101	0	1	4	2	4	5	2	3	4
210317101	0	2	4	4	5	4	3	3	3
210317101	0	1	4	5	4	5	4	5	5
210317101	0	2	4	5	4	5	3	4	5
210317101	0	1	4	5	4	5	0	5	5
210317102	0	1	1	4	0	0	2	3	4
210317102	0	1	4	5	4	3	2	4	4
210317102	0	2	4	4	3	4	2	4	4
210317102	0	2	4	5	3	3	2	5	5
210317102	0	2	4	5	4	3	2	5	5
210317102	0	2	4	5	3	4	2	4	4
210331101	0	2	1	4	0	0	3	5	5
210331101	0	1	4	5	4	4	3	3	4
210331101	0	2	4	5	4	3	3	4	4
210331101	0	1	4	5	4	5	3	3	3
210331101	0	2	4	5	4	4	3	5	5
210331101	0	1	4	5	4	4	3	5	5
210331102	0	2	1	4	0	0	3	4	4
210331102	0	1	4	5	5	5	3	4	4
210331102	0	2	4	5	5	5	3	3	3
210331102	0	1	4	5	5	5	3	4	4
210331102	0	2	4	5	5	5	4	5	5
210331102	0	1	4	5	5	5	3	4	4
210339101	0	1	1	4	0	0	2	5	5
210339101	0	1	4	2	4	3	3	4	4
210339101	0	2	1	5	3	5	3	5	5
210339101	0	1	4	4	4	3	3	5	5
210339101	0	2	4	2	4	4	2	5	5
210339101	0	1	1	2	5	5	4	5	5
210342101	0	1	1	4	0	0	3	4	1
210342101	0	1	4	5	3	3	3	5	5
210342101	0	2	4	5	3	3	0	4	4
210342101	0	1	4	5	2	3	2	4	3
210342101	0	2	4	5	4	4	2	5	5
210342101	0	2	1	5	4	4	2	5	5
210342102	0	2	1	4	0	0	3	5	3
210342102	0	1	4	5	4	3	3	3	3
210342102	0	2	4	5	4	4	3	4	5
210342102	0	1	4	5	3	3	3	5	5
210342102	0	2	4	5	3	4	2	4	4
210342102	0	2	4	4	4	4	3	5	4
210353101	0	2	1	4	0	0	3	4	4
210353101	0	1	4	5	4	4	3	5	5
210353101	0	2	1	5	2	3	3	5	3
210353101	0	2	4	5	3	3	3	5	5
210353101	0	2	4	3	4	2	2	5	5
210353101	0	2	4	5	4	5	4	5	5
210353102	0	1	1	4	0	0	3	5	4
210353102	0	1	4	5	4	4	3	4	3
210353102	0	2	4	5	3	4	2	5	5
210353102	0	1	4	5	3	3	2	4	4
210353102	0	2	4	5	4	3	2	5	5
210353102	0	2	4	5	4	3	3	5	5
210402101	0	2	1	4	0	0	2	3	3
210402101	0	1	4	5	2	3	2	3	3
210402101	0	2	4	5	5	5	2	2	5
210402101	0	2	1	5	2	3	2	3	3
210402101	0	2	4	5	2	3	2	4	4
210402101	0	2	4	5	2	3	2	3	4
210402102	0	2	1	4	0	0	2	5	5
210402102	0	1	4	5	4	3	2	5	5
210402102	0	2	4	5	4	5	2	5	5
210402102	0	2	4	5	3	4	2	4	4
210402102	0	2	4	5	5	4	4	5	5
210402102	0	2	4	5	4	4	2	4	5
210415101	0	1	1	4	0	0	4	5	5
210415101	1	2	4	5	4	5	2	5	3
210415101	1	1	4	5	5	5	3	5	4
210415101	1	1	1	5	5	5	4	5	5
210415101	1	1	1	5	4	5	2	5	4
210415101	1	2	1	3	4	5	2	5	5
210423102	0	2	1	4	0	0	3	3	5
210423102	1	1	4	5	4	5	3	3	4
210423102	1	2	4	5	3	5	3	4	4
210423102	1	2	4	5	4	5	3	3	3
210423102	1	2	4	4	5	5	3	4	5
210423102	1	1	4	5	4	5	3	3	5
210424101	0	1	1	4	0	0	3	3	2
210424101	1	2	4	5	4	3	3	3	3
210424101	1	2	4	3	3	3	3	4	4
210424101	1	2	4	3	4	3	2	2	2
210424101	1	2	4	5	2	3	2	4	3
210424101	1	2	4	3	4	3	2	3	4
210424102	0	1	1	4	0	0	4	3	2
210424102	1	2	4	2	3	4	4	3	3
210424102	1	2	4	3	5	5	3	5	5
210424102	1	2	4	3	5	5	3	5	1
210424102	1	2	4	3	4	5	3	4	5
210424102	1	2	1	3	5	5	2	5	4
210426101	0	1	1	4	0	0	3	4	4
210426101	0	1	4	5	4	5	3	4	4
210426101	1	1	4	3	3	3	4	5	5
210426101	1	2	4	3	4	3	3	5	4
210426101	1	1	4	3	4	4	3	4	4
210426101	1	1	4	3	2	2	2	4	4
210437101	0	1	1	4	0	0	3	3	3
210437101	0	2	4	3	4	3	4	3	5
210437101	1	2	4	3	4	3	3	3	3
210437101	1	2	4	3	2	3	2	3	3
210437101	1	2	4	3	4	3	2	4	3
210437101	0	2	4	3	5	4	2	5	5
210437102	0	1	1	4	0	0	3	4	4
210437102	0	1	4	2	5	4	3	5	3
210437102	1	1	4	5	4	3	3	4	4
210437102	1	2	4	3	3	3	2	5	4
210437102	1	2	4	3	4	3	4	5	5
210437102	0	2	4	3	4	5	2	5	5
210456101	0	1	1	4	0	0	4	3	3
210456101	0	2	4	5	4	4	4	5	4
210456101	1	1	1	3	4	4	4	3	3
210456101	0	1	4	3	4	5	3	3	3
210456101	1	2	4	2	5	4	2	4	5
210456101	1	2	4	3	5	4	2	3	4
210457101	0	1	1	4	0	0	4	4	4
210457101	0	0	4	3	5	3	2	3	5
210457101	0	1	4	5	5	5	2	3	4
210457101	0	1	4	5	3	3	3	4	4
210457101	0	1	4	5	4	4	1	5	5
210457101	0	2	4	5	4	4	2	5	5
210459101	0	1	1	4	0	0	3	1	3
210459101	1	2	4	2	3	3	3	4	3
210459101	1	2	4	3	5	3	3	3	3
210459101	1	2	4	3	5	3	0	4	3
210459101	1	2	4	4	1	2	2	4	5
210459101	1	2	4	3	4	4	2	3	4
210459102	0	1	1	4	0	0	3	1	1
210459102	1	2	4	5	4	3	3	1	1
210459102	1	2	4	3	3	3	2	3	3
210459102	1	2	4	3	2	2	1	3	4
210459102	1	2	4	3	2	2	1	1	5
210459102	0	2	1	2	3	3	2	1	5
210463101	0	1	1	4	0	0	3	3	4
210463101	1	2	4	2	3	3	4	3	2
210463101	1	2	1	3	4	4	3	5	3
210463101	1	2	1	3	3	3	0	3	3
210463101	1	2	1	3	4	4	3	5	5
210463101	1	2	1	3	4	5	2	4	4
210540101	0	2	1	4	0	0	3	3	3
210540101	0	2	4	5	4	3	3	4	3
210540101	0	2	4	5	3	3	3	3	5
210540101	0	2	4	5	3	3	3	3	3
210540101	0	1	4	4	3	4	3	5	4
210540101	0	2	4	5	4	5	4	5	5
210596101	0	1	1	4	0	0	2	3	2
210596101	0	1	4	3	3	3	3	4	4
210596101	0	1	1	5	4	3	2	5	4
210596101	0	1	4	5	4	3	3	4	4
210596101	0	0	4	5	3	2	3	3	3
210596101	0	1	1	5	3	3	3	4	4
210600101	1	1	1	4	0	0	3	5	5
210600101	1	2	4	5	3	3	3	3	5
210600101	1	2	1	5	4	3	2	5	5
210600101	1	2	4	5	4	3	2	2	3
210600101	1	2	1	5	3	3	2	5	5
210600101	1	2	4	5	4	5	2	4	3
210614101	1	1	1	4	0	0	3	3	3
210614101	1	2	4	2	2	5	3	4	3
210614101	1	1	1	3	3	1	2	4	5
210614101	0	1	4	5	0	0	0	5	5
210614101	1	1	1	3	4	3	2	5	5
210614101	1	2	4	4	5	4	4	5	5
210614102	0	1	1	4	0	0	3	4	5
210614102	0	2	4	2	3	2	2	5	3
210614102	0	1	1	3	4	4	0	5	5
210614102	1	2	4	3	3	3	4	5	5
210614102	1	2	1	5	4	4	4	4	4
210614102	0	2	1	2	4	4	4	5	5
210616102	0	1	1	4	0	0	2	4	5
210616102	0	2	4	5	4	4	3	2	3
210616102	0	1	4	5	4	5	0	5	3
210616102	0	2	4	3	3	3	2	5	3
210616102	0	2	4	5	4	3	3	5	4
210616102	0	2	4	4	4	4	3	4	3
210617101	0	1	1	4	0	0	3	4	4
210617101	0	2	4	3	3	3	3	3	3
210617101	0	1	4	3	4	3	2	5	5
210617101	0	2	4	3	3	3	3	3	3
210617101	1	1	4	3	4	3	2	4	4
210617101	0	1	4	2	3	5	2	3	3
210617102	0	1	1	4	0	0	3	3	3
210617102	0	1	4	3	4	5	4	1	1
210617102	0	2	4	3	4	0	3	5	5
210617102	0	1	4	3	5	5	3	5	3
210617102	1	1	1	3	5	4	4	5	5
210617102	1	1	4	5	4	4	4	3	5
210633101	0	1	1	4	0	0	2	3	4
210633101	0	2	4	3	0	4	0	2	3
210633101	0	1	1	3	3	3	2	3	4
210633101	0	2	4	2	4	4	2	3	4
210633101	1	2	1	3	4	3	3	5	4
210633101	0	2	1	3	4	4	2	4	5
210653101	0	1	1	4	0	0	3	4	4
210653101	0	1	4	5	4	5	3	4	3
210653101	0	2	4	5	3	3	3	4	4
210653101	0	1	4	5	4	3	3	4	4
210653101	0	2	4	2	5	4	3	5	5
210653101	0	2	4	3	4	4	3	4	4
210653102	0	1	1	4	0	0	4	4	4
210653102	0	2	4	3	4	4	3	4	4
210653102	0	2	1	5	4	4	3	3	3
210653102	0	2	4	5	4	4	3	4	4
210653102	0	1	4	2	5	5	3	5	5
210653102	0	2	4	5	2	2	3	5	5
210655102	0	1	1	4	0	0	2	4	4
210655102	1	2	4	3	4	5	3	3	3
210655102	0	2	4	3	4	4	2	3	3
210655102	1	2	4	2	3	3	2	3	3
210655102	0	2	4	5	5	5	3	5	5
210655102	1	2	1	2	4	5	3	5	5
210657101	0	1	1	4	0	0	0	4	4
210657101	1	2	4	2	3	3	2	4	2
210657101	1	2	4	3	4	3	3	4	4
210657101	1	2	4	2	3	3	3	4	4
210657101	1	2	4	2	4	4	2	4	3
210657101	1	2	4	5	4	4	2	5	5
210674101	0	2	1	4	0	0	3	4	4
210674101	0	1	4	3	3	3	3	4	4
210674101	0	2	4	5	5	3	3	5	5
210674101	0	1	4	5	4	3	3	4	4
210674101	0	2	4	3	2	2	2	5	5
210674101	0	2	4	5	4	3	3	5	5
210726101	0	1	3	4	3	3	0	5	4
210726101	0	1	4	2	2	2	3	2	3
210726101	0	2	4	5	4	3	2	3	3
210726101	0	1	4	2	3	3	3	4	4
210726101	0	2	4	5	3	4	3	5	4
210726101	0	2	4	2	5	4	2	3	4
210734101	0	1	3	4	4	4	0	3	3
210734101	0	2	4	2	4	4	2	4	4
210734101	0	2	4	3	4	4	3	4	4
210734101	0	1	4	2	4	4	3	4	3
210734101	0	2	4	5	4	4	3	4	5
210734101	0	1	4	2	4	5	3	4	4
210738101	1	1	1	4	0	0	2	2	3
210738101	1	2	4	2	3	2	2	3	5
210738101	1	2	1	3	4	3	3	3	4
210738101	1	1	1	2	4	3	2	3	3
210738101	1	1	4	2	4	3	2	5	5
210738101	1	1	4	3	4	3	2	5	5
210738102	1	1	1	4	0	0	0	4	3
210738102	1	2	4	2	4	3	3	2	3
210738102	1	2	4	3	4	4	3	3	3
210738102	1	2	4	3	3	3	2	3	3
210738102	1	0	4	2	4	5	2	3	4
210738102	1	1	4	2	4	3	2	4	3
210741103	1	1	3	4	2	3	2	4	4
210741103	1	2	2	2	3	3	2	2	3
210741103	0	2	4	3	3	2	2	3	5
210741103	0	2	4	3	4	3	2	5	5
210741103	0	2	4	2	4	3	3	5	5
210741103	0	0	4	2	5	5	2	5	5
210752102	0	1	2	4	3	3	2	4	3
210752102	1	2	4	2	4	3	4	2	3
210752102	1	2	4	3	4	4	3	4	4
210752102	0	1	3	5	4	3	3	4	4
210752102	1	1	4	2	5	5	4	5	5
210752102	0	1	4	2	4	5	2	5	5
210753102	0	1	1	4	0	0	3	4	4
210753102	0	2	4	2	4	3	3	5	2
210753102	1	2	4	3	3	3	3	3	3
210753102	1	1	4	2	4	3	3	3	2
210753102	0	0	4	5	3	3	2	5	5
210753102	0	1	4	2	4	5	3	5	5
210753103	0	1	1	4	0	0	3	2	3
210753103	0	2	4	2	4	3	3	4	3
210753103	0	2	4	3	3	3	3	3	3
210753103	0	1	4	2	4	3	4	4	4
210753103	0	0	4	3	3	3	2	4	4
210753103	0	1	4	2	2	2	3	5	4
210760101	1	1	1	4	0	0	1	4	3
210760101	1	2	4	2	4	3	1	4	4
210760101	0	2	1	3	3	2	2	4	3
210760101	0	2	1	3	4	3	1	4	4
210760101	1	0	4	2	4	3	3	3	3
210760101	1	1	4	3	4	3	2	4	5
210760102	1	1	1	4	0	0	3	5	5
210760102	1	1	3	2	4	4	4	5	5
210760102	0	2	1	3	4	4	2	5	5
210760102	0	2	1	3	5	3	3	5	5
210760102	0	0	1	2	3	4	2	5	5
210760102	0	2	1	2	5	4	3	5	5
210763101	1	1	1	4	0	0	2	3	3
210763101	1	1	4	2	4	3	2	3	3
210763101	1	1	4	3	2	3	3	3	3
210763101	1	1	4	3	2	2	3	3	3
210763101	1	1	1	2	3	3	3	5	4
210763101	0	2	4	5	3	4	2	3	3
210763102	1	1	1	4	0	0	2	1	4
210763102	1	1	4	2	4	3	2	5	4
210763102	1	1	4	3	3	3	3	4	3
210763102	1	1	4	3	2	3	2	4	4
210763102	1	1	1	2	5	3	2	5	5
210763102	0	2	4	5	3	5	2	4	5
210766102	0	1	1	4	0	0	3	3	3
210766102	0	2	4	5	4	4	2	3	3
210766102	0	1	4	3	3	3	3	3	3
210766102	0	1	4	5	4	4	3	3	3
210766102	0	0	1	2	3	3	3	2	5
210766102	0	1	4	5	4	5	2	5	3
210829101	0	1	1	4	0	0	3	3	4
210829101	0	1	4	3	4	3	3	4	4
210829101	1	2	4	3	4	3	3	5	5
210829101	1	2	4	5	4	5	3	5	5
210829101	1	2	4	3	4	4	4	4	5
210829101	0	2	4	4	4	4	2	5	5
210866101	0	1	1	4	0	0	2	5	5
210866101	0	2	4	3	3	3	2	3	3
210866101	1	2	4	3	3	3	2	4	3
210866101	1	2	1	3	5	3	2	4	5
210866101	1	1	4	5	2	2	3	4	5
210866101	1	2	1	3	3	3	3	5	5
210866102	0	1	1	4	0	0	3	5	5
210866102	0	2	4	3	5	5	3	4	4
210866102	0	2	1	5	5	5	3	3	3
210866102	1	2	4	5	5	5	4	5	5
210866102	1	1	4	2	4	5	3	5	5
210866102	1	2	4	5	5	5	3	5	5
210890101	0	1	1	4	0	0	4	5	5
210890101	0	1	4	5	5	5	3	5	5
210890101	0	2	4	5	4	4	3	5	5
210890101	0	1	1	5	4	4	4	5	5
210890101	0	1	4	5	5	4	3	5	5
210890101	0	0	1	5	4	4	3	5	5
210918103	0	1	1	4	0	0	2	5	5
210918103	0	2	4	2	4	3	2	4	3
210918103	0	1	1	2	5	3	2	5	5
210918103	0	0	1	2	4	3	2	3	3
210918103	0	0	4	5	3	3	2	5	5
210918103	0	1	3	5	4	5	2	5	5
210919102	0	1	1	4	0	0	2	4	4
210919102	1	1	4	2	4	4	2	5	5
210919102	1	1	4	5	5	5	3	4	4
210919102	0	2	4	5	4	3	2	3	3
210919102	0	1	4	2	3	3	3	5	5
210919102	0	2	4	5	4	5	3	5	5
210934101	1	1	1	4	0	0	3	5	5
210934101	1	2	2	2	4	5	3	5	5
210934101	1	2	4	2	4	4	0	5	5
210934101	1	2	1	2	5	4	3	4	4
210934101	1	2	4	5	3	4	2	4	4
210934101	1	2	1	3	4	4	2	5	5
210934102	1	1	1	4	0	0	2	5	5
210934102	1	2	2	2	4	4	2	5	5
210934102	1	2	4	2	4	5	3	4	5
210934102	1	2	4	2	3	5	0	3	3
210934102	1	1	4	2	3	3	2	5	5
210934102	1	2	4	5	5	5	2	5	5
210974101	0	1	1	4	0	0	4	5	4
210974101	0	1	4	5	4	4	2	1	3
210974101	0	2	4	5	4	4	3	3	3
210974101	0	2	4	5	4	5	2	4	4
210974101	0	1	4	5	2	3	4	5	5
210974101	0	2	4	5	5	5	3	5	5
210994102	0	2	1	4	0	0	3	3	3
210994102	0	0	4	5	4	4	3	4	4
210994102	0	2	4	5	4	4	3	4	4
210994102	0	1	4	5	4	4	3	3	4
210994102	0	2	4	5	4	3	4	4	4
210994102	0	1	1	5	3	3	3	3	3
210998101	0	2	1	4	0	0	3	4	4
210998101	0	0	4	2	4	3	3	5	5
210998101	0	2	4	3	5	3	3	3	5
210998101	0	1	1	5	5	5	2	5	4
210998101	0	2	4	4	4	4	2	3	3
210998101	0	1	1	4	4	5	3	4	4
211041101	1	1	1	4	0	0	0	3	4
211041101	0	1	4	5	2	3	4	4	3
211041101	0	2	4	3	3	4	3	5	3
211041101	0	2	4	5	4	5	2	3	2
211041101	1	1	1	5	2	3	3	3	3
211041101	1	1	1	2	4	5	2	3	3
211062101	0	1	1	4	0	0	0	0	0
211062101	1	2	4	3	3	3	2	5	3
211062101	1	2	4	3	2	3	2	5	2
211062101	0	2	4	3	4	5	4	5	5
211062101	0	0	4	2	4	4	2	5	5
211062101	0	2	4	2	5	4	2	2	3
211063101	0	1	1	4	0	0	1	4	4
211063101	0	1	4	5	4	4	2	2	2
211063101	1	2	4	5	4	3	3	3	5
211063101	0	1	4	5	4	4	3	5	5
211063101	0	2	4	5	4	4	2	4	4
211063101	0	1	4	5	4	5	2	5	5
211063102	0	1	1	4	0	0	1	4	4
211063102	0	1	4	5	4	4	3	4	4
211063102	1	2	4	5	4	3	2	4	3
211063102	0	1	4	5	4	3	3	5	5
211063102	0	1	4	5	4	4	1	4	4
211063102	1	2	4	5	5	5	2	4	4
211068101	0	1	1	4	0	0	2	3	3
211068101	1	2	4	3	3	3	2	4	3
211068101	1	2	1	3	0	0	4	5	5
211068101	1	2	4	3	4	4	3	4	4
211068101	1	2	4	3	4	4	4	5	5
211068101	1	2	4	2	4	5	3	5	5
211070101	0	1	2	4	3	3	2	5	3
211070101	1	2	4	3	2	2	2	3	5
211070101	0	2	4	3	4	4	3	3	3
211070101	0	0	4	3	4	3	2	3	3
211070101	0	1	4	3	4	3	4	5	5
211070101	0	2	4	3	4	4	3	5	5
211071102	0	1	1	4	0	0		5	5
211071102	0	1	4	2	3	3	2	4	4
211071102	0	1	4	3	4	2	3	5	5
211071102	0	1	4	5	4	4	3	4	5
211071102	0	0	4	5	4	5	2	5	5
211071102	0	1	4	3	4	3	3	3	4
211078102	0	1	1	4	0	0	4	5	5
211078102	0	2	3	2	4	3	3	5	4
211078102	1	2	4	2	4	4	3	3	4
211078102	0	0	4	5	4	5	3	3	3
211078102	0	2	4	5	4	3	3	4	4
211078102	0	1	4	5	5	5	2	5	5
211083102	0	2	1	2	0	0	2	4	4
211083102	0	1	4	5	4	3	3	5	5
211083102	0	2	1	4	4	4	3	4	4
211083102	0	2	4	5	4	3	4	4	5
211083102	0	2	1	3	5	5	2	5	5
211083102	0	2	1	3	4	4	3	5	5
211106101	0	2	1	4	0	0	3	4	4
211106101	0	2	4	3	3	3	3	3	5
211106101	0	2	1	3	4	3	4	5	5
211106101	0	2	4	4	4	3	3	5	5
211106101	0	2	4	5	4	4	3	5	5
211106101	0	2	4	4	5	5	2	5	5
211244102	0	1	1	4	0	0	3	4	4
211244102	0	2	2	5	4	4	2	4	3
211244102	0	2	1	5	3	4	2	3	4
211244102	0	1	1	5	3	3	2	4	4
211244102	0	2	4	5	4	3	2	4	5
211244102	0	1	4	5	3	3	3	4	4
211281103	0	1	1	4	0	0	1	3	3
211281103	0	1	4	5	3	2	1	4	4
211281103	1	2	4	5	4	3	3	5	5
211281103	0	2	4	5	4	3	3	4	5
211281103	0	2	4	5	3	3	3	5	5
211281103	1	2	1	5	4	3	2	5	5
211312101	0	1	1	4	0	0	2	5	5
211312101	0	1	4	5	3	4	3	5	4
211312101	0	2	4	5	3	3	3	5	5
211312101	0	2	4	5	3	3	3	5	5
211312101	0	2	4	5	4	4	3	5	5
211312101	0	1	1	5	3	3	3	5	5
211315101	0	2	1	1	0	0	3	2	3
211315101	0	2	4	5	4	5	4	4	4
211315101	0	2	4	5	3	3	4	5	5
211315101	0	1	4	5	3	3	3	5	5
211315101	0	2	4	5	4	2	3	5	5
211315101	0	2	4	5	5	4	3	1	5
211316101	0	2	1	4	0	0	3	3	4
211316101	0	2	4	5	4	3	3	5	5
211316101	0	2	4	5	3	3	3	5	5
211316101	0	2	4	5	2	3	2	5	5
211316101	0	2	4	5	4	4	3	5	5
211316101	0	2	4	5	4	3	3	5	5
211317101	0	2	1	1	0	0	3	4	4
211317101	0	2	4	5	4	2	3	5	3
211317101	0	2	4	5	3	3	3	4	4
211317101	0	1	3	5	4	4	3	5	4
211317101	0	2	4	5	2	2	3	4	5
211317101	0	2	1	5	2	3	2	5	5
211324101	0	2	1	4	0	0	3	4	5
211324101	0	1	4	5	4	5	3	3	4
211324101	0	2	4	5	4	4	3	5	4
211324101	0	2	4	4	4	3	3	5	4
211324101	0	1	4	5	4	5	3	5	4
211324101	0	2	1	5	4	4	3	5	4
211358102	0	1	1	4	0	0	2	5	5
211358102	0	1	4	2	3	3	2	4	4
211358102	0	2	1	2	3	3	2	5	4
211358102	0	2	4	3	2	3	2	5	5
211358102	0	1	4	3	4	2	2	5	5
211358102	0	2	4	5	5	4	3	5	5
211359101	0	1	1	4	0	0	2	4	5
211359101	0	1	4	5	4	4	3	5	5
211359101	0	2	4	5	4	5	2	5	5
211359101	0	2	4	5	5	5	2	5	5
211359101	0	2	4	5	5	5	2	5	5
211359101	0	1	4	5	5	4	2	5	5
211359102	0	1	1	4	0	0	2	4	4
211359102	0	2	4	5	4	4	3	3	4
211359102	0	2	4	5	4	4	3	5	5
211359102	0	2	4	4	4	5	3	5	5
211359102	0	2	1	5	4	4	3	5	5
211359102	0	1	1	5	5	5	3	5	4
211374101	0	1	3	4	5	5	4	5	5
211374101	1	2	4	3	3	3	2	3	3
211374101	1	2	4	3	4	5	3	5	5
211374101	0	2	4	3	4	5	2	1	1
211374101	1	2	4	2	5	5	2	5	5
211374101	1	2	4	3	4	5	2	3	4
211375101	1	1	1	4	0	0	3	3	4
211375101	1	2	4	3	4	3	2	4	3
211375101	1	2	4	3	3	3	4	5	5
211375101	0	2	1	5	4	3	3	4	4
211375101	1	2	4	3	3	3	3	3	4
211375101	1	1	4	3	4	2	3	3	3
211384102	1	1	1	4	0	0	2	4	4
211384102	1	2	4	2	3	3	2	4	3
211384102	1	2	4	3	2	3	3	4	3
211384102	1	2	4	2	3	3	3	5	3
211384102	1	1	4	5	2	2	2	4	3
211384102	1	2	4	5	5	5	3	5	4
211409102	0	1	1	4	0	0	3	5	5
211409102	0	2	4	3	3	2	3	5	4
211409102	0	2	4	3	4	3	3	5	5
211409102	0	2	4	3	2	2	3	3	5
211409102	1	2	4	3	2	2	2	2	3
211409102	1	2	1	3	2	3	2	5	5
211417102	1	1	3	4	3	3	4	5	4
211417102	1	2	4	3	5	3	4	4	4
211417102	0	2	4	3	4	5	4	5	5
211417102	1	2	4	3	4	5	3	4	4
211417102	1	2	4	5	4	4	2	4	4
211417102	0	1	4	5	5	5	3	4	5
211424103	0	1	1	4	0	0	3	3	4
211424103	0	2	4	3	5	3	3	4	3
211424103	0	1	4	3	5	3	3	4	3
211424103	0	2	4	3	4	3	3	3	4
211424103	0	2	4	3	4	3	2	3	5
211424103	1	2	4	3	5	3	2	5	4
211424104	0	1	1	4	0	0	2	2	5
211424104	1	2	4	3	4	3	3	1	1
211424104	0	2	1	3	4	5	2	3	3
211424104	1	1	4	3	4	5	3	4	5
211424104	0	2	4	3	4	5	4	3	5
211424104	1	2	1	3	5	3	4	5	5
211438102	0	1	1	4	0	0	3	4	4
211438102	0	2	4	2	4	4	2	1	2
211438102	0	2	4	2	4	4	4	3	5
211438102	0	2	4	5	4	5	4	4	4
211438102	0	2	4	5	4	4	2	5	5
211438102	1	2	4	2	4	4	3	5	5
211467101	1	1	1	4	0	0	2	2	2
211467101	1	2	2	3	4	3	2	4	3
211467101	1	2	4	3	3	3	2	1	1
211467101	1	2	4	3	3	3	3	3	3
211467101	0	2	4	3	5	3	2	5	4
211467101	1	2	4	3	5	5	4	4	5
211496102	1	2	3	4	4	3	3	4	3
211496102	1	2	4	3	4	5	4	5	5
211496102	1	1	4	2	4	5	2	5	5
211496102	1	2	4	3	4	5	2	5	5
211496102	1	2	4	3	4	4	2	5	5
211496102	0	2	4	2	2	2	4	5	5
211496105	0	1	1	4	0	0	2	5	4
211496105	0	1	4	3	5	3	4	3	4
211496105	0	1	4	2	5	5	2	5	5
211496105	0	1	4	5	2	2	2	5	5
211496105	0	2	4	4	1	2	2	5	5
211496105	0	2	4	2	4	5	4	5	5
211499105	0	1	3	4	4	3	3	2	3
211499105	0	1	4	3	3	3	4	1	1
211499105	0	2	4	3	4	5	4	5	3
211499105	0	1	4	2	4	3	4	5	4
211499105	0	2	4	3	5	5	4	5	5
211499105	0	1	4	3	4	4	2	5	5
211513102	0	1	1	4	0	0	0	1	1
211513102	0	2	3	2	5	4	3	1	1
211513102	0	2	3	5	3	3	1	3	3
211513102	0	1	4	2	3	3	0	1	4
211513102	0	2	4	5	4	3	2	3	3
211513102	0	2	4	2	4	4	2	3	4
211524102	0	1	1	4	0	0	0	3	3
211524102	0	2	4	5	3	3	2	2	2
211524102	0	1	4	2	3	4	2	5	1
211524102	0	1	4	5	3	3	2	2	2
211524102	0	1	4	5	4	3	2	1	4
211524102	0	2	4	5	2	3	2	3	3
211533101	0	1	1	4	0	0	2	5	4
211533101	0	2	4	2	3	3	2	3	4
211533101	1	2	4	2	3	3	2	3	3
211533101	0	2	4	5	3	3	2	3	2
211533101	0	2	4	2	3	3	2	3	5
211533101	0	2	4	2	4	4	2	5	5
211533102	1	1	1	4	0	0	3	4	4
211533102	0	2	4	2	4	5	4	5	3
211533102	1	1	4	5	4	5	4	5	3
211533102	0	2	1	5	4	5	3	3	3
211533102	1	2	4	5	4	4	3	5	4
211533102	0	1	1	5	4	4	3	3	3
211582101	0	1	1	4	0	0	4	5	5
211582101	0	1	4	5	4	4	3	4	3
211582101	0	2	1	5	4	3	4	5	5
211582101	0	1	4	5	5	4	3	5	5
211582101	1	1	1	5	4	4	3	5	5
211582101	0	1	4	5	4	5	3	5	5
211601104	0	1	1	4	0	0	1	5	5
211601104	0	1	4	5	4	4	2	5	5
211601104	0	2	4	4	4	3	2	4	4
211601104	0	0	4	5	3	3	3	3	5
211601104	0	2	1	5	0	0	2	4	5
211601104	1	2	4	5	4	2	3	5	4
211603101	0	1	1	4	0	0	2	4	3
211603101	0	1	4	5	4	4	3	5	4
211603101	0	2	4	5	5	4	2	5	5
211603101	0	2	4	5	4	4	3	5	4
211603101	0	2	4	5	4	4	3	5	5
211603101	0	2	4	5	4	5	3	4	4
211616101	0	2	1	4	0	0	3	3	3
211616101	0	1	4	5	4	2	3	3	3
211616101	0	2	4	5	2	3	3	4	4
211616101	0	1	4	5	3	3	3	3	4
211616101	0	1	4	5	4	3	2	4	4
211616101	0	2	4	5	4	2	3	3	4
211616102	0	2	1	4	0	0	3	3	1
211616102	0	1	4	5	3	3	3	3	3
211616102	0	2	4	5	3	3	3	4	4
211616102	0	1	4	5	4	3	3	3	4
211616102	0	1	4	4	4	3	2	4	4
211616102	0	2	4	5	4	3	2	4	4
211651101	0	2	1	4	0	0	3	2	3
211651101	0	1	4	5	4	5	3	5	3
211651101	0	2	4	5	3	3	3	5	5
211651101	0	1	1	5	3	3	3	5	5
211651101	0	2	4	2	5	4	2	3	4
211651101	0	2	4	5	4	4	3	3	5
211651102	0	2	1	4	0	0	4	3	3
211651102	0	1	4	5	3	3	2	4	4
211651102	0	2	4	5	3	3	3	5	3
211651102	0	2	1	5	4	3	3	5	5
211651102	0	2	4	2	4	4	3	4	4
211651102	0	2	1	5	4	4	2	5	5
211652101	0	2	1	4	0	0	4	4	4
211652101	0	0	4	5	4	5	3	5	5
211652101	0	2	4	5	4	5	2	3	4
211652101	0	2	1	5	4	5	3	5	5
211652101	0	2	4	5	2	5	2	5	4
211652101	0	1	1	5	4	5	2	5	4
211652102	0	2	1	4	0	0	3	5	5
211652102	0	2	4	5	4	4	4	5	3
211652102	0	2	4	5	4	3	3	5	5
211652102	0	1	4	5	4	5	3	5	4
211652102	0	2	4	5	2	4	4	5	5
211652102	0	2	4	5	2	3	4	5	5
211654103	0	2	1	4	0	0	3	4	3
211654103	0	0	4	5	4	5	3	5	5
211654103	0	2	4	5	3	3	3	4	3
211654103	0	2	4	5	3	3	4	2	2
211654103	0	2	4	4	4	3	2	3	4
211654103	0	2	4	5	2	3	2	4	5
211672101	0	1	1	4	0	0	3	3	3
211672101	0	2	4	4	4	4	3	2	3
211672101	0	2	4	5	4	4	3	4	4
211672101	0	2	4	5	3	3	3	4	4
211672101	0	2	4	5	3	3	2	4	4
211672101	0	2	4	4	4	4	3	4	4
211672102	0	1	3	4	3	3	4	5	4
211672102	0	2	4	2	4	4	3	5	4
211672102	0	2	4	3	4	3	4	5	5
211672102	0	2	4	3	3	3	3	5	5
211672102	0	2	4	5	4	4	4	5	5
211672102	0	1	1	4	5	5	4	5	5
211673101	0	2	3	4	3	3	3	4	4
211673101	0	1	4	5	3	3	3	3	4
211673101	0	2	4	5	3	4	3	1	4
211673101	0	2	4	5	3	4	3	4	4
211673101	0	2	4	5	3	3	3	3	4
211673101	0	2	4	5	4	4	3	5	4
211673102	0	2	1	4	0	0	3	5	4
211673102	0	1	4	5	4	4	3	3	4
211673102	0	2	4	4	3	3	3	3	2
211673102	0	2	4	5	3	3	3	4	4
211673102	0	2	4	5	4	3	2	3	4
211673102	0	2	4	5	3	3	2	5	4
211677101	0	1	1	4	0	0	3	3	3
211677101	0	0	4	5	4	3	0	3	3
211677101	0	2	4	4	4	4	3	4	4
211677101	0	2	4	5	3	3	3	4	4
211677101	0	2	4	5	4	3	3	4	3
211677101	0	2	4	5	4	4	3	4	5
211697101	0	1	1	4	0	0	3	5	5
211697101	0	1	4	5	3	3	2	5	5
211697101	0	2	4	4	3	3	3	5	5
211697101	0	2	4	5	4	3	2	5	5
211697101	0	2	4	5	3	3	2	5	5
211697101	0	1	4	4	4	4	3	5	5
211697102	0	2	1	4	0	0	3	5	5
211697102	0	1	4	5	4	4	2	5	5
211697102	0	2	4	5	4	4	3	4	5
211697102	0	2	4	5	3	3	3	5	4
211697102	0	2	4	5	3	3	3	5	5
211697102	0	1	4	4	4	3	3	4	4
211705101	0	2	1	4	0	0	3	3	3
211705101	0	1	4	4	4	3	2	2	2
211705101	0	2	4	5	2	2	2	2	4
211705101	0	2	4	5	2	3	2	5	4
211705101	0	2	4	4	2	2	2	3	2
211705101	0	1	4	5	4	4	2	3	3
211705102	0	2	1	4	0	0	3	4	4
211705102	1	1	4	3	4	4	3	5	5
211705102	0	2	4	4	4	4	3	5	4
211705102	0	2	4	4	4	4	3	5	4
211705102	0	2	4	5	4	5	3	5	5
211705102	0	2	4	5	4	4	3	5	5
211714102	0	1	1	4	0	0	3	2	3
211714102	0	0	4	4	4	4	3	3	3
211714102	0	0	4	5	4	4	3	2	3
211714102	0	0	4	4	4	3	2	3	2
211714102	0	0	4	5	4	4	3	3	5
211714102	0	0	1	5	4	4	4	4	5
211719101	0	2	1	4	0	0	2	5	3
211719101	0	0	4	2	3	3	3	5	4
211719101	0	2	4	5	4	3	4	3	3
211719101	0	2	4	5	4	3	3	3	3
211719101	0	2	4	5	4	4	3	5	5
211719101	0	1	4	4	4	4	3	4	4
211765101	1	1	3	4	3	3	4	1	1
211765101	1	2	4	3	3	3	4	1	1
211765101	1	2	4	5	4	5	4	3	3
211765101	1	1	4	3	4	5	2	5	5
211765101	1	2	4	2	4	4	2	5	5
211765101	0	1	4	3	5	5	2	5	5
211773103	0	1	1	4	0	0	3	4	5
211773103	0	2	4	3	3	3	3	2	1
211773103	0	2	1	5	4	3	2	4	5
211773103	0	2	1	3	4	3	2	3	5
211773103	0	2	4	2	5	3	3	1	3
211773103	0	1	4	3	4	3	3	5	5
211780102	0	1	1	4	0	0	3	2	4
211780102	0	2	4	3	3	3	4	2	3
211780102	0	2	4	2	4	3	4	5	5
211780102	1	1	4	3	3	3	2	5	3
211780102	0	1	4	3	3	3	2	5	4
211780102	1	2	4	2	3	3	4	5	5
211784102	0	1	1	4	0	0	3	4	3
211784102	0	2	4	5	5	5	2	3	3
211784102	0	2	4	2	2	2	2	3	3
211784102	0	2	4	5	5	5	2	3	3
211784102	0	1	4	2	3	3	0	5	5
211784102	0	1	4	5	3	3	2	5	5
211837102	0	1	1	4	0	0	1	1	1
211837102	0	1	4	5	2	3	3	3	3
211837102	0	2	4	5	3	3	2	5	5
211837102	0	2	4	5	3	3	2	3	2
211837102	0	2	4	5	3	3	2	4	5
211837102	0	1	4	5	2	3	2	3	3
211837103	0	1	1	4	0	0	2	3	3
211837103	0	1	4	5	3	3	3	3	3
211837103	0	2	4	5	4	3	2	5	5
211837103	0	2	4	5	3	4	2	4	3
211837103	0	2	4	5	4	3	2	4	5
211837103	0	2	4	5	2	4	4	5	3
211850101	0	1	1	4	0	0	3	4	3
211850101	0	1	4	5	3	3	2	3	3
211850101	0	2	4	5	4	4	2	3	4
211850101	0	2	4	5	3	3	2	3	3
211850101	0	2	4	5	2	2	2	2	3
211850101	0	2	4	4	4	3	2	4	4
211884101	0	2	1	4	0	0	3	2	2
211884101	0	1	4	5	3	3	3	4	3
211884101	0	2	4	5	3	3	3	1	3
211884101	0	1	4	5	3	3	3	3	3
211884101	0	2	4	5	3	4	3	4	4
211884101	0	2	4	5	4	5	3	5	5
211885101	1	1	3	4	5	5	3	1	2
211885101	0	2	4	2	4	4	3	2	3
211885101	1	2	4	3	4	4	2	1	1
211885101	1	2	4	3	4	5	3	2	3
211885101	0	2	4	5	5	5	3	1	2
211885101	1	2	4	2	5	5	3	3	3
211923101	0	1	1	4	0	0	3	5	5
211923101	1	2	4	5	4	5	2	4	4
211923101	1	2	4	2	2	2	2	5	5
211923101	1	1	1	3	2	2	2	5	4
211923101	0	2	4	3	4	3	4	5	5
211923101	0	1	1	3	5	2	4	5	5
211929101	1	1	1	4	0	0	2	3	1
211929101	1	2	4	2	3	3	1	2	2
211929101	1	2	4	5	3	3	3	3	5
211929101	1	2	4	3	3	3	3	5	5
211929101	1	2	4	3	4	4	1	4	4
211929101	1	2	1	3	2	2	3	5	3
220060101	1	2	2	4	4	3	3	4	4
220060101	1	2	4	2	3	3	3	4	4
220060101	1	2	4	4	4	3	2	5	5
220060101	1	2	4	5	4	5	3	3	4
220060101	1	2	4	2	4	2	2	5	4
220060101	1	2	4	3	4	3	3	4	4
220060102	0	1	2	4	4	3	2	4	4
220060102	0	2	4	2	3	3	2	3	3
220060102	1	2	4	2	3	3	2	5	5
220060102	0	2	4	5	5	5	2	5	5
220060102	1	2	4	2	2	2	2	5	5
220060102	1	2	4	2	4	5	2	5	5
220081101	1	2	1	4	0	0	4	4	4
220081101	0	2	2	2	4	3	3	4	3
220081101	0	2	4	5	4	5	4	4	4
220081101	0	2	4	3	3	3	3	3	3
220081101	0	0	4	2	4	4	4	5	5
220081101	0	2	1	3	4	4	2	3	3
220091104	0	1	1	4	0	0	3	3	4
220091104	0	2	4	3	4	3	3	4	4
220091104	1	2	1	5	3	3	3	5	5
220091104	1	2	4	3	4	3	3	5	5
220091104	0	2	1	3	4	4	3	5	5
220091104	0	2	4	5	4	3	3	4	5
220137101	0	2	1	4	0	0	1	2	2
220137101	0	1	4	4	3	3	2	2	3
220137101	0	2	4	4	2	3	2	1	3
220137101	0	1	4	5	5	4	3	4	4
220137101	0	1	4	5	2	2	2	3	3
220137101	0	2	4	2	3	2	4	3	5
220165102	0	1	1	4	0	0	3	3	3
220165102	0	2	4	3	4	4	4	5	5
220165102	1	1	4	5	4	3	3	4	4
220165102	0	1	4	5	4	3	3	5	4
220165102	0	1	4	4	4	5	3	4	5
220165102	0	2	4	3	4	3	2	3	3
220186102	0	1	1	4	0	0	4	2	2
220186102	0	1	4	5	4	3	2	4	4
220186102	0	2	4	5	2	3	2	5	5
220186102	0	1	4	5	4	5	3	4	4
220186102	0	2	1	5	4	4	2	5	5
220186102	0	2	1	5	4	4	2	5	5
220186103	0	1	1	4	0	0	4	4	4
220186103	0	1	4	5	4	4	4	4	4
220186103	0	1	4	5	4	4	3	5	5
220186103	0	1	4	5	4	5	3	5	5
220186103	0	1	4	5	5	4	2	5	5
220186103	0	0	4	5	5	5	3	5	5
220257101	0	1	3	4	4	3	3	3	3
220257101	0	1	4	3	4	3	3	4	3
220257101	0	2	4	3	4	3	3	5	3
220257101	0	2	1	5	4	3	3	5	5
220257101	0	1	1	5	4	3	4	5	5
220257101	0	0	4	5	4	4	4	5	5
220287102	0	1	1	4	0	0	2	5	4
220287102	0	1	4	3	3	3	3	5	4
220287102	0	2	4	5	4	3	3	5	4
220287102	0	1	4	2	4	4	2	5	5
220287102	1	2	4	3	4	4	2	4	5
220287102	1	2	1	3	4	3	3	5	5
220290101	0	1	1	4	0	0	3	4	3
220290101	0	1	4	3	3	3	2	2	3
220290101	1	1	4	5	4	3	2	4	4
220290101	0	1	4	3	4	4	3	4	5
220290101	1	2	4	3	4	3	3	3	5
220290101	1	2	4	3	4	4	2	5	4
220323101	0	2	1	4	0	0	2	2	4
220323101	0	1	4	5	4	4	3	5	2
220323101	0	2	4	4	4	3	3	5	4
220323101	0	1	4	5	4	4	2	4	4
220323101	1	2	4	4	4	4	3	4	4
220323101	0	1	4	5	4	4	3	4	4
220328101	0	1	1	4	0	0	2	4	4
220328101	0	1	3	3	3	4	2	5	5
220328101	0	2	4	3	4	5	4	5	4
220328101	0	0	4	5	3	3	3	5	5
220328101	0	2	2	5	3	3	4	5	5
220328101	0	2	4	5	1	2	2	5	5
220330101	0	1	1	4	0	0	3	3	4
220330101	0	0	4	0	4	4	3	5	5
220330101	0	2	4	2	4	5	2	3	1
220330101	0	1	4	5	2	4	4	4	5
220330101	0	1	4	2	4	2	3	4	4
220330101	0	0	4	5	1	4	3	5	5
220330102	0	1	3	4	4	4	3	5	4
220330102	0	2	4	5	4	5	2	5	5
220330102	0	1	4	2	4	4	3	2	4
220330102	0	1	4	5	3	3	4	1	1
220330102	0	2	4	5	2	4	2	5	5
220330102	0	2	4	2	5	5	2	5	5
220352104	0	1	1	4	0	0	3	2	3
220352104	0	2	4	5	3	3	2	3	3
220352104	0	1	4	5	5	4	2	3	4
220352104	0	1	4	4	4	4	3	3	4
220352104	0	1	4	5	3	5	2	3	5
220352104	0	2	4	2	4	4	2	3	3
230034101	0	1	1	4	0	0	4	2	2
230034101	0	1	4	3	4	4	2	5	5
230034101	1	2	4	3	4	4	2	5	5
230034101	0	2	4	3	5	5	3	5	5
230034101	0	2	4	3	4	5	2	5	5
230034101	1	2	4	5	5	5	2	5	5
230071101	1	1	1	4	0	0	3	5	5
230071101	1	2	4	3	4	3	4	3	2
230071101	1	2	4	5	4	4	3	3	5
230071101	1	1	4	3	4	3	3	5	5
230071101	1	2	4	3	2	2	2	5	5
230071101	0	2	4	3	4	4	3	1	5
230081101	0	1	1	4	0	0	3	5	5
230081101	0	2	4	3	5	5	3	4	2
230081101	1	2	4	3	5	5	4	5	3
230081101	1	2	4	2	3	4	3	5	5
230081101	1	2	4	3	4	5	4	5	5
230081101	1	2	4	3	4	5	3	5	4
230088101	0	1	1	4	0	0	2	1	1
230088101	0	2	4	3	3	3	4	2	1
230088101	0	1	4	5	4	4	2	5	5
230088101	0	2	4	3	4	3	3	3	2
230088101	1	1	1	3	1	1	4	5	5
230088101	0	0	3	2	4	3	3	5	5
230155101	0	1	1	4	0	0	2	4	3
230155101	0	1	4	2	2	1	1	4	4
230155101	0	2	4	5	3	3	3	5	5
230155101	0	1	4	5	4	3	3	5	5
230155101	0	2	4	5	3	2	2	5	4
230155101	0	1	4	5	5	4	2	5	5
230167101	0	2	1	4	0	0	3	5	2
230167101	0	2	4	5	5	4	2	5	3
230167101	1	1	4	3	4	3	4	4	4
230167101	1	2	4	3	4	3	2	4	4
230167101	1	1	4	3	4	3	4	5	5
230167101	0	2	1	4	5	5	4	5	5
230191101	0	1	1	4	0	0	2	2	2
230191101	0	2	4	5	4	4	3	4	4
230191101	1	2	4	3	2	3	3	5	5
230191101	1	2	4	3	3	2	2	5	5
230191101	1	1	4	3	4	4	3	5	5
230191101	0	2	4	2	4	5	3	5	5
230191102	1	1	1	4	0	0	2	5	5
230191102	0	2	4	3	4	3	3	4	4
230191102	1	2	4	3	4	3	2	4	3
230191102	1	2	4	3	3	2	2	5	5
230191102	1	2	4	3	4	4	4	5	5
230191102	1	2	4	3	4	3	3	5	5
230283101	0	1	1	4	0	0	3	5	4
230283101	0	2	4	5	3	3	2	4	4
230283101	0	2	4	5	2	2	3	3	4
230283101	0	1	4	5	4	5	0	2	5
230283101	0	2	4	5	3	3	3	5	5
230283101	0	2	4	5	4	4	2	1	5
230329101	0	2	1	4	0	0	3	5	3
230329101	0	1	4	5	4	4	3	5	4
230329101	0	2	4	5	4	4	3	5	5
230329101	0	2	4	3	5	5	4	5	5
230329101	0	2	1	5	5	4	3	5	5
230329101	1	1	4	5	5	5	4	5	5
230355102	0	2	3	4	4	5	3	5	5
230355102	0	1	4	2	4	4	3	5	5
230355102	0	2	4	5	4	3	3	5	5
230355102	0	2	4	5	4	4	3	5	5
230355102	0	2	4	5	3	3	2	5	5
230355102	0	2	4	5	5	5	4	5	5
230375103	0	1	1	4	0	0	3	2	3
230375103	0	1	4	5	4	4	3	3	3
230375103	0	2	4	5	4	5	3	5	3
230375103	0	2	4	5	4	4	3	4	4
230375103	0	2	4	5	4	4	3	5	5
230375103	0	1	4	5	4	2	4	4	3
230454101	0	1	1	2	0	0	3	5	5
230454101	0	1	4	5	4	3	3	5	4
230454101	0	2	4	4	4	3	2	5	4
230454101	0	1	4	5	2	3	3	4	4
230454101	0	1	4	5	2	3	2	5	4
230454101	0	1	1	5	2	4	3	5	4
230509103	0	1	1	4	0	0	3	3	4
230509103	0	2	4	3	2	2	3	3	3
230509103	0	1	4	5	4	5	2	3	3
230509103	0	2	4	5	2	3	2	3	3
230509103	0	2	4	3	3	3	3	3	5
230509103	0	1	4	5	5	4	3	5	5
230511101	1	1	1	4	0	0	3	3	3
230511101	0	1	4	3	3	3	2	1	3
230511101	1	1	4	3	3	2	2	3	3
230511101	1	2	4	2	3	3	2	2	2
230511101	0	1	4	3	3	3	2	5	5
230511101	1	2	4	2	2	2	0	3	4
230520102	0	1	1	4	0	0	4	5	5
230520102	0	2	4	4	4	5	2	5	5
230520102	0	2	4	5	4	5	0	1	5
230520102	0	2	4	5	3	5	2	5	5
230520102	0	1	4	5	4	3	2	5	5
230520102	0	1	4	5	4	3	4	5	5
230530101	0	2	1	4	0	0	2	4	3
230530101	0	2	4	4	2	2	2	5	3
230530101	0	2	4	5	3	3	3	5	5
230530101	0	1	4	5	3	3	2	5	3
230530101	0	2	4	4	3	4	3	5	5
230530101	0	0	4	4	3	4	2	5	4
230537102	0	1	1	4	0	0	2	5	2
230537102	0	2	4	4	4	3	2	5	4
230537102	0	2	4	5	3	3	2	2	2
230537102	0	1	4	3	2	3	2	2	1
230537102	0	2	4	5	1	1	1	2	2
230537102	0	2	4	3	3	2	2	4	4
230537103	0	1	1	4	0	0	3	5	5
230537103	0	2	4	4	4	4	2	5	3
230537103	0	2	4	5	3	3	2	5	5
230537103	0	2	4	2	3	1	2	4	3
230537103	0	1	4	3	4	3	2	5	4
230537103	0	1	4	3	4	4	3	5	4
230542101	0	1	1	4	0	0	2	4	5
230542101	0	2	4	5	5	4	2	5	5
230542101	0	2	4	5	4	4	2	4	4
230542101	0	2	4	5	4	3	2	5	5
230542101	0	1	4	4	2	2	3	5	5
230542101	0	1	4	5	3	3	3	5	5
230544101	0	2	1	4	0	0	3	5	4
230544101	0	2	4	4	2	3	3	5	5
230544101	0	2	4	5	4	3	2	3	3
230544101	0	1	4	5	4	5	3	5	5
230544101	0	2	4	3	3	2	2	5	5
230544101	0	2	4	5	4	5	2	5	5
230549103	0	1	1	4	0	0	3	2	4
230549103	0	2	4	3	3	4	3	3	3
230549103	0	1	4	3	4	3	2	2	3
230549103	0	2	4	3	3	3	3	3	3
230549103	0	2	4	3	2	3	2	3	3
230549103	1	1	4	5	2	4	2	1	3
230565101	0	1	3	4	4	4	2	4	4
230565101	0	2	4	3	3	4	3	1	4
230565101	1	1	4	3	4	4	3	5	5
230565101	0	2	4	3	3	3	2	3	4
230565101	0	2	4	5	2	4	2	5	5
230565101	0	2	4	2	4	4	2	5	5
230565105	0	1	1	4	0	0	3	4	4
230565105	0	2	4	3	4	3	3	3	3
230565105	0	1	4	3	4	3	2	3	3
230565105	0	2	4	5	4	4	2	3	3
230565105	0	2	4	5	4	3	2	5	5
230565105	0	2	4	3	4	3	2	5	5
230568101	0	1	1	4	0	0	3	4	4
230568101	0	2	4	2	3	3	3	3	3
230568101	0	2	4	5	4	4	3	5	5
230568101	0	1	4	5	3	3	3	5	4
230568101	0	1	4	5	2	2	0	4	4
230568101	0	1	4	5	3	3	3	3	5
230585102	0	1	1	4	0	0	2	4	4
230585102	0	2	4	4	2	1	2	5	5
230585102	0	2	4	5	4	4	2	3	3
230585102	0	2	4	3	3	3	3	4	4
230585102	0	2	4	5	4	3	3	5	5
230585102	1	1	1	5	4	3	3	5	5
310052101	0	1	1	4	0	0	3	4	3
310052101	0	1	4	4	3	3	3	3	3
310052101	0	2	4	5	3	4	3	3	3
310052101	0	2	4	5	4	5	3	2	2
310052101	0	2	1	3	4	4	2	1	3
310052101	0	2	1	3	4	4	3	2	3
310087101	0	2	0	4	4	3	3	2	3
310087101	0	1	2	3	4	3	3	3	3
310087101	0	2	1	5	4	4	3	3	3
310087101	0	2	1	3	4	3	2	3	3
310087101	0	2	1	3	4	4	4	4	4
310087101	0	2	1	3	4	4	3	3	3
310119101	0	1	0	1	4	4	4	4	4
310119101	0	2	4	5	2	2	2	1	4
310119101	0	2	4	5	5	4	3	5	5
310119101	0	0	4	3	3	2	3	3	5
310119101	0	1	4	5	5	5	4	5	5
310119101	0	1	1	3	5	4	3	5	5
310182102	0	2	3	4	4	4	3	1	4
310182102	0	2	2	3	4	4	3	4	4
310182102	0	2	4	3	4	4	2	4	4
310182102	0	2	4	3	5	5	3	3	3
310182102	0	2	4	3	4	4	3	3	4
310182102	0	2	4	5	5	5	3	3	4
310211101	1	1	0	3	5	4	4	3	2
310211101	0	1	3	5	5	5	2	4	5
310211101	1	2	3	5	2	4	0	4	4
310211101	0	1	2	5	5	5	2	5	5
310211101	0	2	1	5	4	5	0	3	5
310211101	0	1	2	5	5	5	4	3	4
310273101	0	2	3	4	4	4	2	4	4
310273101	0	2	4	5	4	4	3	5	4
310273101	0	2	1	4	4	4	2	4	4
310273101	0	2	4	3	4	4	4	5	4
310273101	0	2	4	3	4	3	2	4	4
310273101	0	2	4	3	4	4	3	4	4
310273102	0	2	3	4	4	4	3	5	5
310273102	0	1	4	3	2	3	2	3	3
310273102	0	2	4	3	3	3	2	4	4
310273102	0	2	4	3	4	3	3	5	5
310273102	0	2	4	3	4	3	2	5	5
310273102	0	2	4	3	4	3	4	3	4
310309101	0	1	1	4	0	0	3	3	4
310309101	0	1	4	3	4	4	3	4	5
310309101	0	2	4	3	4	3	3	5	5
310309101	0	1	1	5	4	3	3	5	3
310309101	0	2	4	3	4	3	4	5	5
310309101	0	2	4	5	4	4	3	3	3
310309102	0	1	1	4	0	0	3	4	3
310309102	0	1	4	3	4	4	3	3	4
310309102	0	2	4	3	3	3	3	3	5
310309102	0	2	4	5	4	4	3	5	3
310309102	0	2	4	3	4	3	3	5	5
310309102	0	2	4	2	4	3	3	4	5
310391102	0	2	0	4	2	2	3	3	3
310391102	0	0	4	3	2	2	3	3	2
310391102	0	2	4	5	2	3	2	1	1
310391102	0	2	4	3	4	1	0	1	1
310391102	0	2	1	3	1	1	2	1	1
310391102	0	0	1	5	5	5	2	1	1
310417101	0	2	1	4	0	0	4	5	4
310417101	0	0	4	3	3	3	3	4	4
310417101	0	2	4	3	3	3	4	5	5
310417101	0	1	4	3	3	3	3	4	3
310417101	0	2	4	3	4	4	3	5	5
310417101	0	2	4	5	4	4	2	4	4
310417102	0	2	1	4	0	0	4	5	5
310417102	0	0	4	5	5	4	1	2	1
310417102	0	2	4	5	5	4	3	4	3
310417102	0	1	1	5	4	5	3	5	5
310417102	0	2	1	3	4	3	3	5	3
310417102	0	2	4	5	4	5	3	4	5
310457101	0	1	1	4	0	0	3	3	3
310457101	0	0	4	5	4	3	2	3	3
310457101	0	1	4	3	3	3	2	5	4
310457101	0	1	4	5	3	3	2	5	4
310457101	0	1	4	5	4	3	2	5	4
310457101	0	0	4	5	4	4	2	3	5
310457102	0	1	3	4	4	3	4	3	5
310457102	0	0	4	3	4	3	3	3	4
310457102	0	1	4	3	3	3	2	3	5
310457102	0	1	4	5	4	3	3	5	4
310457102	0	1	4	3	4	3	3	5	5
310457102	0	0	4	5	4	3	2	3	5
310480101	0	1	1	1	0	0	3	3	3
[truncated: 4,331 more rows]
