# Supplementary material for: Association between changes in social capital and mental well-being among older people in China
Source: PeerJ. 2022 Aug 25;10:e13938. doi: 10.7717/peerj.13938 (PMC9420402; doi:10.7717/peerj.13938)
Supplement: Supplemental Information 6 [file peerj-10-13938-s006.xlsx]

## Sheet: Sheet1
yt1	yt2	yt3	yt4	yt5	yt6
1	1	0	0	0	0
0	0	0	0	0	0
1	1	1	0	1	1
1	0	0	0	0	0
1	0	0	0	0	0
1	1	0	0	0	0
0	1	0	0	0	0
1	1	1	1	1	0
1	1	1	1	1	1
1	1	1	1	1	0
1	1	1	1	1	1
1	0	1	1	1	1
0	0	0	0	0	1
1	0	1	0	1	0
1	0	0	0	1	0
1	1	1	0	0	0
1	1	1	0	1	1
0	0	0	0	0	1
0	0	0	0	0	0
0	0	0	0	0	0
0	0	0	0	0	0
1	0	1	1	0	0
0	1	1	0	1	0
1	1	0	0	1	0
1	1	1	1	1	1
0	0	1	1	1	0
0	1	1	1	1	0
1	1	1	1	1	1
1	1	1	1	1	1
1	1	0	1	1	0
1	1	1	1	1	1
1	1	1	1	1	1
1	1	1	1	1	0
1	1	1	1	0	1
0	0	0	0	0	0
1	1	1	1	1	1
0	0	1	1	0	0
0	0	0	1	0	0
1	1	1	1	1	1
1	1	1	1	1	0
0	0	0	0	0	0
0	0	0	0	0	0
1	1	1	1	1	1
0	1	1	0	1	1
0	1	0	0	0	0
1	1	0	0	0	0
1	1	1	1	1	1
0	0	1	1	1	1
1	0	0	1	0	0
1	1	0	0	1	1
1	1	1	0	1	1
1	0	0	0	0	1
0	1	1	0	0	0
0	0	0	0	0	0
0	0	0	0	0	0
1	1	1	0	0	0
0	0	0	0	0	1
0	0	1	0	0	1
0	0	0	0	0	0
1	1	1	0	1	0
1	1	1	1	1	0
1	1	1	0	1	1
1	1	1	0	1	1
1	1	0	0	1	0
0	0	1	0	0	0
0	0	0	1	0	1
1	0	1	0	0	0
1	0	1	0	1	0
1	0	1	1	1	1
1	1	1	1	1	0
1	0	1	0	0	1
0	0	0	0	0	0
0	0	0	1	1	0
1	0	0	0	0	0
0	0	0	0	0	0
0	1	0	0	0	0
0	0	1	0	0	0
0	0	0	0	0	0
1	0	1	0	0	0
0	0	0	0	0	0
1	1	1	1	1	0
0	0	1	0	0	0
1	1	0	0	1	0
1	1	0	0	0	1
0	1	1	0	0	0
0	0	0	0	0	0
0	0	0	1	1	0
1	1	0	0	0	0
1	0	0	1	0	0
1	0	0	1	0	0
0	0	0	0	0	0
1	1	1	1	0	1
0	1	1	0	0	1
1	0	0	0	0	0
0	1	0	0	0	0
1	0	1	0	0	1
0	0	1	0	0	0
0	0	0	1	0	0
1	1	0	0	0	1
0	1	1	1	1	0
1	1	1	0	0	0
1	1	1	0	1	0
1	1	1	0	0	0
0	1	0	0	0	0
0	0	1	0	0	0
0	0	0	1	1	1
0	1	0	1	0	0
0	0	1	0	0	0
0	0	0	0	0	0
1	1	1	0	0	0
1	1	1	1	1	0
1	1	1	1	1	1
1	1	0	1	1	1
1	1	1	1	1	1
1	1	0	1	1	1
1	1	1	0	1	1
0	1	0	0	0	0
0	0	0	0	0	0
1	1	1	0	0	0
1	1	0	0	0	0
1	1	1	1	1	1
0	1	1	0	0	1
0	1	1	0	0	1
0	0	1	1	0	1
0	0	1	0	0	0
1	1	1	0	0	1
0	0	0	0	0	0
1	1	1	1	1	1
1	0	1	0	0	0
0	1	0	1	0	0
0	1	1	1	1	1
0	0	0	1	0	1
1	1	1	0	0	1
0	0	1	0	0	0
1	1	1	0	1	1
0	1	1	1	1	1
0	0	0	0	0	0
0	0	0	0	0	0
1	1	0	0	0	0
0	0	1	0	0	0
1	1	1	1	0	0
0	0	1	0	0	0
1	0	1	1	1	0
1	1	1	1	1	0
0	1	0	1	0	1
1	0	1	1	1	1
1	1	0	0	0	1
1	1	1	1	1	1
1	1	1	1	1	1
1	1	1	1	1	1
1	1	1	1	1	1
1	1	1	1	0	0
1	0	1	1	1	1
1	0	1	0	0	0
1	1	1	1	1	0
0	1	1	1	1	1
1	1	1	1	1	1
1	1	1	1	0	1
1	1	1	1	1	1
0	1	1	1	1	1
1	1	1	1	1	1
0	1	0	0	0	0
0	0	0	0	0	1
0	0	0	0	0	0
1	1	1	1	0	0
1	0	1	1	0	0
0	1	1	1	0	0
1	0	1	0	0	1
0	1	1	0	1	1
0	1	0	0	1	0
1	1	1	0	1	1
0	0	1	0	0	0
1	1	0	0	0	0
1	1	1	1	0	0
1	1	1	1	1	1
1	1	1	0	1	1
0	0	0	0	0	0
1	1	1	1	0	1
1	1	1	0	0	1
0	0	1	0	1	0
1	1	1	1	0	1
1	1	1	1	1	0
0	1	1	0	0	0
1	1	1	1	1	1
1	1	1	1	1	0
1	0	1	0	0	0
1	1	0	0	0	0
1	1	1	1	1	0
1	1	1	0	0	0
1	1	1	1	1	0
0	1	1	0	1	0
1	0	0	1	0	1
0	1	0	0	0	0
1	0	1	1	0	0
1	1	1	1	1	1
1	1	1	1	1	0
1	1	1	1	1	0
0	0	0	0	0	0
0	1	1	1	0	1
1	1	1	1	1	1
1	0	0	0	1	0
1	1	1	1	1	1
1	0	1	1	1	1
1	1	0	0	0	1
1	1	1	1	1	1
1	1	0	0	1	1
1	1	1	1	1	1
0	0	0	0	0	0
1	1	1	1	1	0
1	0	0	0	0	1
0	0	0	0	0	0
1	0	0	0	0	1
1	1	0	0	0	0
1	1	1	1	0	1
0	0	0	0	0	0
1	0	1	0	0	0
0	1	1	1	1	0
1	1	1	1	1	0
1	1	1	1	0	1
1	0	1	0	1	0
0	1	0	1	1	1
1	1	1	1	1	1
1	1	0	0	0	0
1	1	1	1	1	1
1	1	1	1	1	1
1	0	1	0	1	1
1	1	0	0	1	0
1	1	1	1	1	1
1	1	1	1	1	1
1	0	0	0	0	1
1	0	0	1	1	0
0	0	0	1	1	1
0	1	1	0	0	0
0	1	1	0	1	0
0	0	0	0	0	1
1	1	1	1	1	1
0	1	0	0	0	0
1	1	1	0	0	0
1	0	1	1	0	0
0	1	0	0	0	1
0	0	0	0	0	0
0	0	0	0	0	0
0	0	0	0	0	0
1	0	0	0	0	0
1	1	1	1	1	1
1	1	1	1	1	1
1	1	1	1	1	0
0	1	1	1	1	1
0	0	1	0	0	0
0	0	1	0	0	0
0	1	1	0	1	1
1	1	1	1	0	1
1	1	1	1	1	1
1	0	1	1	1	0
1	0	1	1	1	0
1	1	1	0	1	0
1	1	1	1	1	1
1	1	1	1	1	1
0	1	0	0	0	1
1	1	1	1	0	0
0	1	0	0	1	0
1	1	0	0	0	0
1	1	1	1	1	0
1	0	0	0	1	1
1	1	0	1	0	0
0	1	0	0	0	0
0	0	1	0	1	1
1	0	0	1	0	1
0	1	1	1	0	0
0	0	1	0	1	0
1	1	1	1	1	1
1	0	1	1	0	1
1	0	0	1	0	0
1	1	1	1	0	0
0	0	0	0	1	0
1	1	1	0	0	0
0	1	1	1	1	0
1	1	1	1	1	1
1	1	0	0	0	0
1	1	1	0	0	0
1	1	1	1	1	0
0	0	0	0	0	0
0	1	0	0	0	1
1	1	1	1	1	0
1	0	1	0	0	1
1	1	0	1	1	1
1	1	1	0	0	0
1	0	1	1	0	1
1	1	1	1	1	1
1	0	1	1	0	1
1	1	1	1	1	1
1	0	0	0	0	0
0	0	0	0	1	0
1	1	1	1	0	1
0	0	0	0	1	1
0	0	0	0	0	0
0	0	0	0	0	0
0	0	0	0	1	0
0	1	1	0	1	0
0	1	0	1	1	1
1	1	1	1	1	1
0	1	1	0	1	0
1	1	1	0	1	0
1	1	1	1	1	1
1	0	1	0	0	1
1	1	1	1	1	1
0	1	0	0	0	0
1	0	0	1	1	0
0	1	0	0	1	0
0	1	1	0	1	1
0	1	1	0	0	0
0	0	0	0	0	0
0	1	1	0	1	1
0	1	0	1	1	0
1	1	0	0	0	0
1	1	1	1	0	0
1	1	0	0	0	0
1	0	1	1	0	1
1	1	1	1	1	1
1	1	1	1	1	1
1	1	1	0	1	0
0	0	1	0	0	0
1	1	1	1	1	1
1	1	1	0	0	0
1	1	1	1	1	1
1	1	1	0	1	1
1	1	1	1	1	1
0	1	1	1	1	1
0	1	1	0	0	1
1	1	1	0	1	1
1	0	1	1	0	0
1	1	1	1	1	1
1	1	0	1	1	0
1	1	1	1	0	0
1	1	1	0	1	1
1	1	1	0	1	1
1	0	1	0	0	0
1	1	1	0	0	1
1	1	0	1	0	1
1	1	1	1	1	1
1	1	1	0	0	0
1	1	1	1	0	1
1	1	1	1	1	1
1	1	1	1	1	1
1	1	1	1	1	1
1	0	1	1	0	0
1	1	1	0	1	1
1	1	1	1	1	1
1	1	1	0	0	0
0	1	1	0	0	0
1	1	1	1	0	1
1	1	1	1	1	1
1	1	0	1	0	0
1	0	1	1	1	1
0	1	0	0	1	1
1	0	1	1	0	1
1	0	0	1	0	1
1	1	1	1	1	1
1	1	1	1	1	1
1	0	0	0	0	0
1	0	1	0	1	0
1	1	1	0	0	0
1	0	1	1	1	1
1	0	1	1	1	1
1	1	1	1	1	1
0	1	1	1	1	1
1	1	1	1	1	1
1	1	1	1	1	1
1	1	0	0	1	1
1	1	1	1	0	1
0	1	0	1	0	1
1	1	1	1	1	1
1	1	1	1	1	1
1	0	0	0	0	0
0	1	1	1	1	1
0	1	1	1	1	1
1	1	1	1	1	1
1	1	1	1	1	1
1	1	1	1	1	1
1	1	0	1	1	1
0	1	1	0	1	0
1	0	0	0	0	0
1	1	1	1	1	1
1	1	1	1	1	1
1	1	1	1	1	1
1	1	1	0	1	1
1	1	1	0	0	1
1	1	1	1	0	1
1	1	1	1	0	1
1	1	1	0	1	1
1	0	0	1	0	0
1	1	1	1	0	1
1	1	1	0	1	1
0	0	0	1	0	1
1	1	1	1	1	1
1	0	0	0	0	0
1	1	1	1	1	1
1	0	1	1	0	0
1	1	1	1	1	1
1	1	1	1	1	1
1	1	1	1	1	1
0	0	0	0	0	1
0	0	1	0	0	1
1	1	1	0	0	0
1	0	1	0	1	1
0	0	0	0	1	1
0	0	1	0	0	0
0	1	0	0	0	0
0	1	1	1	1	0
0	0	1	1	1	0
0	1	1	0	1	1
0	1	1	0	0	0
0	1	1	1	1	1
0	1	1	0	1	0
0	0	0	1	1	0
1	1	1	1	0	1
1	0	1	1	0	0
1	1	1	1	1	0
0	1	1	1	0	1
1	1	1	1	1	0
0	1	1	1	1	1
0	1	1	1	1	1
1	1	1	1	1	1
1	1	1	1	0	0
1	1	0	1	0	0
1	1	1	0	1	0
1	1	1	1	1	1
0	1	1	0	0	1
1	1	1	0	0	0
1	1	1	1	1	1
1	1	1	1	1	0
1	1	1	1	1	0
0	1	0	0	0	0
0	1	0	0	0	0
1	0	0	0	0	0
1	1	0	1	0	0
1	1	1	1	1	1
1	0	1	0	1	1
1	1	1	1	1	1
1	1	1	1	1	1
1	0	1	0	1	1
1	1	1	1	1	1
1	0	0	0	0	0
1	1	1	0	1	1
1	1	1	0	1	1
0	1	1	1	0	0
1	1	0	0	1	1
1	1	0	0	0	1
0	0	0	1	0	1
1	0	1	0	0	0
1	1	1	0	1	0
0	0	1	0	0	0
0	1	1	0	0	0
0	1	1	1	1	1
0	1	1	0	0	1
1	1	1	0	1	1
0	1	0	1	1	0
1	1	1	1	1	1
0	1	0	1	0	0
1	0	1	1	0	1
1	1	1	1	1	1
0	1	1	0	0	0
1	0	1	1	0	0
1	1	1	0	1	1
0	1	1	0	0	0
0	1	1	1	0	0
1	1	1	0	0	0
0	1	1	0	0	0
1	1	1	1	1	1
1	0	0	0	0	0
1	1	0	1	0	1
0	1	1	1	1	0
1	0	0	1	0	0
0	1	1	0	0	1
0	0	0	0	0	0
1	0	1	0	0	1
0	0	0	0	0	0
1	0	1	0	0	1
1	0	1	0	0	0
1	1	1	0	1	0
1	0	1	1	1	1
0	0	0	0	1	0
1	1	1	0	0	1
1	1	0	0	0	0
1	1	0	1	1	0
0	1	1	0	1	1
0	1	0	0	0	1
1	0	1	0	1	0
1	1	0	0	1	1
1	1	1	1	1	0
1	1	1	1	0	1
1	0	1	0	0	0
1	1	0	0	1	1
0	0	1	0	0	1
0	0	1	0	0	0
1	0	1	1	1	1
0	0	0	0	0	0
0	0	0	0	0	0
0	0	1	0	0	0
0	0	1	0	0	0
0	0	0	0	0	0
0	0	0	0	0	0
1	0	0	0	0	0
1	0	0	0	1	1
1	1	1	1	1	1
1	1	0	0	1	0
0	0	0	0	0	0
0	1	1	0	1	1
1	0	0	0	0	0
1	1	1	0	0	0
1	1	0	0	1	0
0	0	0	0	1	0
1	1	1	1	0	1
1	1	1	0	0	0
1	0	0	0	0	0
1	1	1	1	1	1
0	0	0	0	0	0
1	1	1	0	1	0
1	1	1	1	0	0
1	1	1	0	0	0
1	1	1	0	1	1
0	0	0	0	1	1
1	1	1	0	1	1
1	1	1	0	0	1
0	0	0	1	0	0
0	0	0	0	0	0
0	0	0	1	0	0
1	1	1	1	0	0
1	0	1	0	0	1
1	1	1	1	0	0
0	0	1	1	1	0
1	1	1	0	1	1
1	1	1	0	0	1
0	1	0	0	0	0
0	1	0	1	0	1
1	1	1	0	1	1
1	1	1	0	1	1
1	1	1	0	1	0
1	0	1	1	0	1
1	0	1	1	1	1
1	0	0	0	0	1
0	0	0	0	1	1
1	0	1	1	0	0
1	1	1	1	1	1
1	0	1	0	1	0
1	0	0	0	1	1
1	1	0	0	0	1
0	0	0	0	1	1
0	0	1	1	0	1
0	1	1	1	1	0
0	1	0	0	0	0
1	1	1	0	0	0
1	1	1	1	1	1
1	1	1	1	1	1
0	1	0	0	0	0
0	0	1	1	0	1
1	0	0	0	0	0
1	1	1	0	0	0
0	1	1	0	0	0
0	0	0	1	0	0
1	1	1	1	0	1
1	1	0	1	0	0
1	1	1	1	0	0
1	1	1	1	1	1
1	1	1	1	1	0
1	0	0	1	0	0
0	0	1	0	1	1
0	0	1	1	0	0
0	0	1	0	0	0
1	1	1	0	1	1
1	1	1	1	0	1
1	1	1	1	1	1
0	0	0	0	0	0
1	0	1	0	0	0
1	1	1	1	1	1
1	1	1	1	1	1
0	0	0	0	0	0
0	0	1	0	1	0
0	0	1	0	0	1
1	1	1	1	1	1
1	0	0	0	1	0
1	1	0	0	0	0
1	1	1	1	1	1
1	1	0	0	1	1
1	1	0	1	1	1
1	1	1	1	1	1
1	1	1	1	1	0
1	1	1	1	1	1
1	0	1	0	0	1
1	1	1	0	0	0
1	1	0	0	0	1
1	1	0	0	1	1
0	1	1	0	1	0
1	1	0	1	0	0
1	0	1	0	1	1
0	0	0	1	1	0
1	1	1	1	1	1
1	1	0	1	1	0
0	1	1	0	1	1
1	1	0	1	1	1
1	1	1	1	1	1
0	1	1	1	0	0
1	1	1	0	1	1
1	1	0	1	0	1
1	1	0	0	1	1
1	0	0	0	0	0
0	0	0	0	0	0
1	1	1	1	1	1
0	1	0	0	0	0
1	1	1	1	0	1
0	1	1	0	1	1
1	1	1	0	1	1
1	0	0	0	0	1
0	0	0	0	0	1
0	1	1	0	1	1
0	1	1	1	1	1
1	1	1	1	1	1
0	1	0	1	0	0
1	1	1	0	1	1
0	0	1	1	1	0
1	1	1	1	1	0
0	1	1	0	0	0
0	0	0	0	0	0
0	1	1	0	1	0
0	1	0	1	1	0
1	1	1	0	0	0
0	1	1	1	0	0
1	1	0	0	0	0
0	0	0	1	0	0
1	1	1	0	1	1
0	1	1	0	1	1
0	1	1	0	0	0
1	1	1	1	0	0
0	0	0	0	0	0
1	1	1	1	1	1
1	0	1	0	0	0
1	1	1	1	1	1
1	1	1	1	0	1
1	1	1	1	1	1
0	1	0	0	0	0
1	1	0	0	1	1
1	1	1	1	0	0
1	0	0	0	1	1
1	1	1	0	0	1
1	1	1	1	1	1
1	1	1	0	1	1
1	1	0	0	1	1
1	0	0	0	0	0
1	0	1	0	0	0
0	0	1	0	0	0
1	0	1	0	1	1
1	1	1	1	1	1
1	1	0	0	0	0
0	1	0	1	1	1
1	0	0	1	0	0
1	0	0	0	0	0
1	1	0	1	0	0
1	1	1	1	1	1
0	0	0	0	0	0
0	0	1	0	0	0
0	0	0	0	0	0
1	0	1	0	0	1
1	1	1	0	1	1
1	0	1	0	1	0
0	1	0	0	1	0
0	0	0	0	0	0
1	0	1	0	0	0
1	0	1	1	1	0
0	0	0	0	0	0
1	1	1	1	0	0
1	1	1	1	0	0
0	0	1	1	0	0
0	1	1	0	0	0
1	1	1	0	1	0
1	1	1	1	0	1
1	1	1	1	1	0
1	0	0	1	0	0
1	1	1	1	0	1
1	1	1	1	1	0
1	1	1	1	1	0
1	1	1	1	1	0
1	1	1	0	1	0
1	0	1	1	1	0
1	1	1	0	1	1
1	0	1	0	1	1
1	1	1	0	1	1
0	0	0	1	1	0
0	1	0	0	0	0
1	1	1	1	0	0
1	1	1	0	1	1
1	1	1	0	1	0
0	1	1	0	0	0
1	0	0	0	0	0
0	1	1	0	1	1
1	1	1	0	1	0
0	1	1	0	0	0
1	1	1	1	0	0
1	1	1	0	1	0
0	0	0	0	0	0
1	1	1	0	1	0
1	0	1	0	0	0
0	0	1	0	0	0
1	0	1	0	0	0
1	1	0	0	0	0
0	0	1	0	1	0
0	0	0	1	0	0
1	1	1	1	1	1
1	1	1	0	1	1
1	1	1	1	1	1
1	1	1	0	1	0
1	1	1	1	1	1
0	0	1	0	0	0
0	1	1	1	1	1
1	1	1	0	0	0
0	1	1	1	1	0
0	1	1	0	1	1
1	1	1	1	1	1
1	1	1	0	1	1
0	1	0	1	0	0
1	0	0	0	1	1
0	0	0	0	0	0
0	1	1	0	1	0
0	1	0	0	0	0
1	0	1	0	1	0
0	1	0	1	0	0
0	1	0	0	1	0
1	1	1	1	1	1
0	0	0	0	0	0
0	0	0	0	1	0
0	0	0	0	0	0
0	0	0	0	0	0
0	1	0	0	0	0
1	1	0	0	0	0
1	1	1	0	1	1
0	0	0	0	1	0
0	1	0	1	0	1
1	1	1	0	1	1
0	1	0	0	0	0
1	1	1	1	1	1
0	0	0	0	0	0
0	1	1	0	1	1
1	1	1	0	1	1
0	1	1	0	1	1
0	0	0	1	0	0
0	0	0	0	1	0
1	1	1	1	0	0
0	0	0	1	0	0
0	0	0	1	1	1
1	0	0	1	1	0
0	1	1	0	0	1
1	1	1	0	1	1
1	1	1	0	0	0
1	0	0	0	0	1
0	0	0	1	1	1
0	0	0	0	0	0
1	0	1	1	1	1
0	0	0	1	0	1
0	0	1	1	1	0
1	1	1	0	1	1
1	1	1	1	0	0
1	1	1	0	1	1
1	1	1	1	0	1
1	1	1	1	0	0
0	1	1	0	1	0
1	1	0	1	1	1
0	0	0	0	0	0
1	0	0	1	1	0
1	1	0	1	1	0
0	1	1	0	0	0
0	0	1	0	1	0
1	0	0	0	0	0
1	0	1	1	0	0
1	0	1	1	1	0
1	1	1	0	0	0
0	1	0	0	0	0
1	1	1	1	1	1
0	0	0	0	0	0
1	1	0	0	0	0
1	1	0	0	0	1
1	1	1	0	1	1
1	1	1	0	0	1
1	1	1	0	0	0
0	1	1	0	1	1
1	1	1	1	1	1
1	1	1	1	1	1
1	1	1	1	1	1
0	0	1	0	0	0
0	1	0	0	0	0
1	1	1	1	0	1
1	1	1	1	0	0
0	1	1	0	0	0
0	1	0	1	0	0
0	1	0	0	0	0
1	1	1	1	0	1
1	1	1	1	0	0
1	1	1	0	1	1
0	1	1	1	1	0
1	1	1	1	1	0
0	1	0	0	0	1
0	0	0	0	0	0
1	0	1	0	0	0
0	0	0	1	0	1
0	0	1	0	0	0
1	1	1	1	1	1
0	1	1	0	0	1
1	1	1	0	1	1
1	1	0	1	0	1
1	1	1	0	1	1
0	1	1	0	1	0
1	0	0	0	0	0
1	0	1	0	1	0
1	1	0	0	1	0
1	1	0	0	0	1
1	1	1	0	1	1
1	1	1	0	0	1
1	1	1	1	1	1
1	1	1	1	0	0
1	0	1	0	1	0
1	1	1	0	1	1
1	1	1	1	1	1
1	1	1	0	1	1
1	1	1	1	1	0
0	1	0	1	0	0
1	0	1	0	1	1
1	0	0	1	1	1
1	1	1	0	0	1
1	1	1	1	1	1
1	1	1	1	1	1
1	1	0	1	1	1
1	0	0	1	0	0
1	0	0	1	0	0
1	0	1	1	0	1
1	1	1	0	1	1
1	1	1	1	1	0
1	1	1	0	1	1
1	1	1	0	0	1
1	1	1	1	1	0
1	0	1	0	1	0
1	0	0	0	0	0
0	0	1	1	0	0
1	0	1	1	0	0
1	1	1	1	1	1
1	1	1	0	1	0
1	1	1	0	0	1
1	1	1	0	1	1
1	1	1	1	1	1
0	0	0	1	0	0
0	0	0	0	1	1
0	0	1	0	0	0
0	0	0	0	0	0
1	1	1	1	1	1
0	1	0	1	0	0
1	1	1	1	0	0
1	1	1	1	1	1
1	1	1	1	1	1
1	1	1	1	1	1
0	1	0	1	0	0
0	1	0	0	0	1
0	1	0	0	1	1
1	1	1	1	0	1
0	0	0	0	0	0
0	1	0	1	1	0
0	0	0	0	0	1
0	1	0	0	0	1
0	0	1	0	0	1
1	1	0	0	1	0
1	1	0	0	1	0
1	0	1	0	1	0
1	1	1	1	1	0
0	0	0	0	0	0
0	0	0	0	0	0
0	1	0	1	0	0
0	1	0	0	1	1
0	0	0	0	0	0
0	0	0	0	0	1
1	0	0	0	0	0
1	1	1	0	1	1
1	1	1	0	1	1
0	1	0	0	0	0
1	1	1	0	1	1
1	0	1	1	1	0
1	0	0	0	1	0
1	0	0	0	0	0
1	1	1	1	1	1
0	1	1	1	1	1
1	0	0	0	0	0
1	0	1	0	1	0
1	0	0	0	0	0
1	0	1	1	0	0
0	0	1	0	0	1
1	1	1	0	1	1
0	0	0	1	0	0
0	1	0	0	1	1
0	0	0	0	1	1
0	0	1	1	1	1
0	1	0	0	1	1
1	0	1	1	0	0
0	0	0	1	0	1
1	1	0	0	0	0
1	1	0	0	0	0
1	0	1	0	1	0
1	1	0	0	1	1
1	1	1	0	1	1
1	0	0	0	0	0
1	0	1	0	1	1
1	0	0	1	0	0
0	1	1	1	1	1
1	1	1	0	1	0
1	1	1	0	1	1
0	0	0	0	0	0
1	1	1	1	1	0
1	1	1	1	0	1
1	0	1	0	0	1
1	0	1	0	0	0
0	0	0	0	0	0
0	0	0	0	0	0
0	1	0	0	1	0
1	1	0	1	0	0
1	0	0	1	0	0
0	1	1	0	1	1
0	0	0	1	0	0
0	1	1	1	0	0
1	0	1	0	0	1
1	0	0	1	0	1
0	1	0	0	0	0
1	1	1	0	0	1
1	1	1	0	0	1
1	1	1	0	0	1
1	1	1	1	1	1
1	0	0	0	0	0
1	1	1	1	1	0
0	0	0	0	1	0
1	0	0	0	0	0
1	1	1	1	1	1
0	1	1	0	1	0
1	0	0	1	1	0
1	0	0	0	1	0
1	1	1	1	1	1
1	1	1	0	1	1
1	1	1	0	1	1
1	1	1	1	1	1
0	1	0	0	0	0
0	0	0	0	0	0
1	1	1	1	1	1
1	0	1	1	1	1
1	0	1	1	0	0
1	0	0	0	0	1
0	0	0	0	1	0
1	1	0	0	0	0
1	1	1	0	1	1
0	0	1	0	0	1
0	0	0	0	0	0
0	0	1	0	1	1
1	1	1	0	0	0
1	0	1	0	0	0
1	1	1	1	1	1
1	1	1	1	1	1
0	1	1	0	0	0
0	1	1	0	1	1
1	0	1	0	0	0
1	1	1	1	1	1
1	1	1	1	1	0
1	1	1	0	1	0
1	1	1	0	1	1
1	1	1	0	1	1
1	1	1	0	1	0
1	1	1	0	1	1
1	1	1	0	0	0
1	1	0	1	0	0
1	1	0	1	0	0
1	1	1	1	0	0
0	1	0	0	0	0
0	0	0	0	0	0
0	0	1	0	0	0
0	0	1	1	0	0
0	0	0	1	0	1
0	1	0	0	0	0
0	0	0	1	0	0
0	0	0	1	0	0
1	1	1	0	0	1
0	0	0	0	0	1
0	0	0	0	0	1
0	0	1	1	0	0
0	1	1	1	1	1
1	0	0	0	0	0
0	0	1	1	1	0
0	0	0	0	0	0
0	0	0	0	0	0
0	0	0	0	0	0
0	1	0	0	0	0
1	1	1	0	0	1
0	0	0	1	0	1
0	0	0	0	0	1
0	1	0	0	0	1
1	0	0	1	0	1
0	0	0	0	0	0
0	0	0	0	0	0
0	0	0	0	0	0
0	0	0	0	0	0
1	0	1	1	0	0
1	0	0	0	0	1
1	1	1	0	1	1
0	0	0	0	1	0
1	0	0	1	0	0
0	0	0	0	0	0
1	0	0	0	1	0
1	0	0	0	0	0
0	0	1	0	0	1
0	1	0	0	0	0
1	0	0	0	0	0
1	1	1	0	1	1
0	1	1	0	0	1
1	0	0	0	0	1
0	1	1	0	1	0
0	1	0	1	0	1
0	0	0	0	1	1
1	1	1	0	0	1
0	1	1	0	0	1
0	0	0	0	0	0
1	0	0	0	1	0
1	1	1	1	1	0
1	1	1	0	0	1
0	0	1	1	1	1
0	1	1	0	1	0
0	0	0	0	0	0
1	0	0	0	0	0
0	0	1	0	0	1
1	1	0	0	0	0
1	1	1	0	1	1
1	1	0	0	1	0
1	0	1	0	0	1
1	1	1	0	1	0
0	1	0	0	0	0
1	0	1	0	0	0
1	0	1	0	1	0
1	0	0	0	0	0
1	1	1	0	0	0
1	0	1	0	1	1
1	0	1	0	1	1
1	0	1	0	0	1
0	0	0	0	0	0
0	0	0	0	0	0
1	0	1	1	0	1
1	0	1	0	0	1
0	1	0	0	0	1
1	0	1	0	0	1
1	1	0	0	0	0
1	0	1	0	0	0
1	1	1	0	0	0
1	1	1	1	1	1
0	0	0	0	0	1
1	0	0	1	0	0
1	1	1	0	1	0
1	1	1	0	1	1
0	1	0	1	0	1
